# Supplementary material
Source: publisher figshare collection journal article supplement (https://springernature.figshare.com/ndownloader/files/18127868)
Supplement: Supplementary file 1 [file 18127868]

## Sheet: Raw Data
E	Site	Hole	Core	Type	Sect	Interval Top (cm)	Interval Bottom (cm)	Interval Median (cm)	median CCSF-D (m)	Age (ka)	weight (g)	Volume (ml)	Micropipette (ml)	Number of rads in Q slide	Rads Absolute abundances (skel/g)	Acanthodesmia vinculata	Anthocyrtidium zanguebaricum/ophirense	Archipera triclavigera	Arachnocoralium calvata	Arachnocorys castanerides	Amphimelissa setosa	Botryostrobus aquilonaris	Botryostrobus auritus/australis gr.	Botryopyle scatum	Carpocanarium papillosum	Carpocanistrum ensigerum	Cornutella profunda	Corocalyptra cervus	Corocalyptra kruegeri	Cycladophora bicornis	Cycladophora cornuta	Cycladophora davisiana	Dictyophimus crisiae	Eucecryphalus sp.	Eucyrtidium acuminatum	Eucyrtidium anomalus	Eucyrtidium sp.	Lamprocyclas maritalis	Lampromitra cracenta	Lampromitra erosa	Liriospyris leticulata	Lithomelissa setosa	Lophophaena hispida	Lophophaena thoracites	Lophophaena spp.	Lophospylis pentagona	Peridium spinipes	Peryphiramis circumtexta	Phormacantha hystrix
346	U1429	A	1	H	1	27	29	28	0.45	0.789403	5.02	100	0.5	948	37768.9	7	4	12	27	22			6	5	4		3		2	6	2			8	7	3				21	2	19	26	13	24
346	U1429	A	1	H	1	69	70	69.5	0.865	1.51741	2.56	100	0.5	259	20234.4			13	14	11			4		3		3					1		2	2	2		3			1		2	6	7
346	U1429	A	1	H	2	27	29	28	1.95	3.42074	5.04	100	0.5	532	21111.1	3	1	11	27	21			8	3	1	1	2	2		8		1		3	3	6				14		13	15	11	18	6
346	U1429	A	1	H	3	27	29	28	3.45	6.05209	4.99	100	0.5	725	29058.1	5	5	10	33	25			6	7	2		6	4		14				1	7	3		2		19		8	23	15	29	3
346	U1429	A	1	H	3	69	70	69.5	3.865	6.78009	2.59	100	0.5	280	21621.6	2		11	16	3			5	4			1			1		2			5					3		2	6	4	13
346	U1429	A	1	H	3	109	110	109.5	4.265	7.48178	2.37	100	0.5	214	18059.1	4	4	3	22	3			14	1			1			7						5	1	1		6		3	5	3	24				3
346	U1429	B	2	H	2	27	29	28	4.98	8.73606	5.01	100	0.5	581	23193.6	1	3	16	35	28			8	1	3		4	2		9	1	4		7		1	2			17		21	5	5	28	3
346	U1429	B	2	H	2	109	110	109.5	5.795	10.1658	1.78	100	0.5	40	4494.38	1	1	5	9	17			10	1		2	4			7		2		4	1					6	1	6	1	4	14				4
346	U1429	B	2	H	3	27	29	28	6.48	11.3674	5.19	100	0.5	411	15838.2	4	1	13	27	38		3	18		2	1	3	6		6	2	2		3	6		2	1		21	2	12	3	24	26	2		2
346	U1429	B	2	H	4	27	29	28	7.98	13.9987	5.45	100	0.5	246	9027.52	1	2	34	19	32							2	4		4	1			1	3		3			11		135	1	16	14
346	U1429	B	2	H	4	69	70	69.5	8.395	14.7267	1.86	100	0.5	91	9784.95		2		6	10		1	10				1			3				3								93	2	4	6
346	U1429	A	2	H	3	27	29	28	10.16	17.823	5.11	100	0.5	365	14285.7	2		10	14	45			8					3		7		3		2			1			7		210	2	4	14
346	U1429	A	2	H	4	27	29	28	11.66	20.4543	5.11	100	0.5	220	8610.57	1		3	17	17			2		3		4			4		9			7		2	2		12		205	4	25	6
346	U1429	A	2	H	5	27	29	28	13.16	23.0856	5.09	100	0.5	237	9312.38			5	29	18				1	4		3	2		8	1	6			3	1	4			9		86	3	30	16	7		2
346	U1429	A	2	H	6	27	29	28	14.66	25.717	5.1	100	0.5	418	16392.2			2	22						3		2			1		3		1	2		1			3		106		3	17				3
346	U1429	B	3	H	3	27	29	28	16.37	28.7167	5.31	100	0.5	478	18003.8	2		7	25								4			11		1			3		2			8		112	5	6	27				3
346	U1429	B	3	H	4	27	29	28	17.87	31.3481	5.1	100	0.5	112	4392.16	2		3	13	6				2			2			8		3		2	2					4	1	36			15
346	U1429	A	3	H	2	27	29	28	18.32	32.1375	5.11	100	0.5	318	12446.2			6	6	2			7	1	2		4	3		12		2			4			1		10		171	2		14			2	4
346	U1429	A	3	H	3	27	29	28	19.82	34.7688	5.02	100	0.5	260	10358.6		1	2	10	8		1		1	6		7	6		1		3		1	3		2	3		8		28	1	11	23	2			15
346	U1429	A	3	H	4	27	29	28	21.32	37.2894	5.03	100	0.5	432	17176.9		3	8	9	7		2					3	1		6		1		1	1		4			5		134	3	4	9	2			11
346	U1429	A	3	H	5	27	29	28	22.82	39.7511	5.45	100	0.5	346	12697.2	1		1	7	1		2	4	1		3	2			5	1	2			5		2			13		164	9	12	8	8		1	13
346	U1429	A	3	H	6	27	29	28	24.32	42.2129	5.12	100	0.5	385	15039.1			5	21	5		2	5		3					6		1		2	3		1			8		211	2		11
346	U1429	B	4	H	2	27	29	28	25.83	44.6911	5.04	100	0.5	576	22857.1		2	2	16	7		1	5		3					5	2	2		2	4							175		13	19	8			3
346	U1429	B	4	H	3	27	29	28	27.33	47.1529	5.09	100	0.5	436	17131.6	4	3	1	25	8		4					1			3					2			1		9		83	4	9	15	9		2	15
346	U1429	B	4	H	4	27	29	28	28.83	49.6147	5.4	100	0.5	372	13777.8			2	12	13			8	1	2		5	7		6	1				1					8		144	5	1	17	5		1	2
346	U1429	B	4	H	5	27	29	28	30.33	52.0765	5.11	100	0.5	433	16947.2	2	4		24	4				2	2		7	4		4	1				8					12		117	6	3	29	5			9
346	U1429	B	4	H	6	27	29	28	31.83	54.5383	5.12	100	0.5	505	19726.6	3		7	34			1	8	1			2				1	2			1					8		83	6	12	13			4	14
346	U1429	A	4	H	4	112	114	113	33.38	57.0821	5.22	100	0.5	206	7892.72	2	1	1	17	10		1	5				8	4		9		3			1					16		15	2	7	18				21
346	U1429	A	4	H	5	27	29	28	34.03	58.1489	5.46	100	0.5	473	17326		2		29	7		1	10	2		1	3			3		1		3	4		4			18		16	8	12	20	1		2	11
346	U1429	A	4	H	6	27	29	28	35.53	60.6106	5.03	100	0.5	422	16779.3		1		10	1		2	2	2	3	2	2	1		1	2			2			3			7		195	2	5	16				23
346	U1429	B	5	H	3	27	29	28	37.34	63.5812	5.6	100	0.5	201	7178.57			6	12	7		1	10	1	3		7			9					4					1		56	7	7	16				3
346	U1429	B	5	H	4	27	29	28	38.84	66.043	5.49	100	0.5	313	11402.6			6	12	4		1			2		3			5		2			3					5		112	6	12	21			2	11
346	U1429	B	5	H	5	27	29	28	40.34	68.5048	5.1	100	0.5	339	13294.1	4	1	4	23	3			3	2	5		4			6		5						1		2		155	5	6	31				3
346	U1429	B	5	H	6	27	29	28	41.84	71.3445	5.3	100	0.5	639	24113.2		1	2	36	39			17	2	5		4	2		5	1	4		2	3				1	2		119	7	14	42			1	1
346	U1429	A	5	H	5	27	29	28	43.97	75.5526	5.12	100	0.5	476	18593.8			2	38	23			6	1	3		2	4		4	4	4		3						2		42	8	7	16			2
346	U1429	A	5	H	6	27	29	28	45.47	78.5161	5.2	100	0.5	605	23269.2	2	1	8	27	35		3	9		1	1	5	2		14	1	1		2	3					9		37	18	8	32	2		2	5
346	U1429	B	6	H	2	102	104	103	46.53	80.6103	5.03	100	0.5	664	26401.6	4	3	8	29	43			6	1	3	4	4			12				6	9					17		49	12	6	21			1	1
346	U1429	B	6	H	3	27	29	28	47.28	82.0921	5.32	100	0.5	368	13834.6	4		3	9	24			11	1	2		1	1		7		2		4	4					10		114	9	13	28				2
346	U1429	B	6	H	4	27	29	28	48.78	85.0555	5.09	100	0.5	331	13005.9	2		5	14	17			7		3		3	2		9	2	10			3					7		18	7	7	39			4	6
346	U1429	C	8	H	1	27	29	28	53.38	94.1436	5.16	100	0.5	431	16705.4	2	2	6	21	13			6	3	5		4	1		7	1			1	4					9		48	9	13	15	4		2	9
346	U1429	C	8	H	2	27	29	28	54.88	97.1071	5.27	100	0.5	5	189.753	1		1	5	5			7		1		1	1	1	2		1		2	1					6		16	2		6
346	U1429	A	7	H	1	27	29	28	56.09	99.4976	5.37	100	0.5	1	37.2439
346	U1429	A	7	H	2	27	29	28	57.59	102.461	5.15	100	0.5	597	23184.5	2	2	22	34	4			10	3	5		4	1		1	1	1		2	4					2		49	9	18	6				1
346	U1429	A	7	H	3	27	29	28	59.09	105.425	5.27	100	0.5	519	19696.4	1		8	26	27			7	4	1	1	1	5		4	1	1		5	3					7		16	7	11	11	7			6
346	U1429	A	7	H	4	27	29	28	60.59	108.419	5.12	100	0.5	394	15390.6			20	24	32			6	2	2	1	2	3		7	2	3		2	5		1			8		35	5	1	34	3			5
346	U1429	A	7	H	5	27	29	28	62.09	111.969	5.02	100	0.5	709	28247			6	25	10			14	3	3	2	6	4	1	10	2	3			4					11		143	6	7	38	7		2	1
346	U1429	A	7	H	6	27	29	28	63.59	115.519	5.02	100	0.5	852	33944.2	5	1	20	38	17			14	4	9	4	5	7	2	7	3	4		3						14		28	8	12	31	10		3	3
346	U1429	B	8	H	3	27	29	28	65.12	119.14	5.04	100	0.5	837	33214.3	1	6	9	25	16			12	11	4	1	5	4	4	6		2	1	4	1					12		15	19	7	49	5		2	7
346	U1429	B	8	H	3	69	70	69.5	65.535	120.122	2.15	100	0.5	230	21395.3	1	1	2	8				5				1			4				3	4					3		1	3	3	7	1
346	U1429	B	8	H	4	27	29	28	66.62	122.689	5.06	100	0.5	442	17470.4	2	1	4	12	2			9	2	1		5	6	1	1		2		7	1					7		17	7	2	15	1	4		6
346	U1429	B	8	H	5	27	29	28	68.12	126.239	5.17	100	0.5	299	11566.7	4	2	5	21	4			12	1			4	3	1	3			1	2	1					7		35	3	8	50	1	2	2	24
346	U1429	B	8	H	6	27	29	28	69.62	129.789	5.12	100	0.5	159	6210.94	3		4	7	10					3		3	1		5	1	2		3						6		21	9		22				3
346	U1429	C	10	H	2	27	29	28	69.92	130.499	5.04	100	0.5	224	8888.89			3	18	14			7							2										1		18	3		27			1	18
346	U1429	C	10	H	3	27	29	28	71.42	134.049	5.12	100	0.5	317	12382.8			6	39	10			11				1			2				1	1	1				2		13	2	8	44				6
346	U1429	C	10	H	4	27	29	28	72.92	137.599	6.13	100	0.5	342	11158.2				12	4			6				4			4		10			2					3		46	2	8	26				20
346	U1429	C	10	H	5	27	29	28	74.42	141.148	6.31	100	0.5	339	10744.8		2	2	10	10			3					1		1		3								3		123	1	3	13	1		1	8
346	U1429	C	10	H	6	27	29	28	75.92	144.698	5.48	100	0.5	344	12554.7	2	1		2	14			5				1			1		1		2	1					7		40	3	3	12			1	4
346	U1429	A	9	H	1	128	130	129	77.3	147.964	4.85	100	0.5	447	18433			14	38	23			8		2		3	2		1		2			1							114	5	15	33				5
346	U1429	A	9	H	2	27	29	28	77.79	149.123	4.86	100	0.5	299	12304.5	3		9	27	15			10							2	1	5										77		5	24			1	5
346	U1429	A	9	H	3	27	29	28	79.29	152.673	5.94	100	0.5	417	14040.4	1		13	41	22							1			7												21	5	4	39				5
346	U1429	A	9	H	4	27	29	28	80.79	156.321	6.42	100	0.5	463	14423.7			9	13	4			3				4			2		12		3								205	3	1	14				6
346	U1429	A	9	H	5	27	29	28	82.29	159.168	5.08	100	0.5	301	11850.4			44	17	5			9				1			5		4		3								23	3		43	3			4
346	U1429	A	9	H	6	27	29	28	83.79	162.015	6.44	100	0.5	348	10807.5	2		5	13	8			12				2								3					4		28	5		42			2	7
346	U1429	B	10	H	4	27	29	28	85.24	164.767	7.36	100	0.5	193	5244.57		2	1	13	10			15				2			4		2			1							13	1	1	13			3	13
346	U1429	B	10	H	5	27	29	28	86.77	167.67	7.05	100	0.5	408	11574.5	1		2	17	14			12		3					4		27			2		4			5		14	8	7	30	1			13
346	U1429	B	10	H	6	27	29	28	88.27	170.517	5.47	100	0.5	511	18683.7		1	11	15	20			15				4			5		20										125	1	2	14				9
346	U1429	A	10	H	3	27	29	28	89.48	172.813	6.27	100	0.5	465	14832.5	1		9	13	19			15	1	3		3	2		4		19		2								12	6	3	30				8
346	U1429	A	10	H	4	27	29	28	90.98	175.66	5.38	100	0.5	444	16505.6	2		3	13	12			14	1	3		9			6		23		2	1					2		10	5	4	15				11
346	U1429	A	10	H	5	27	29	28	92.49	178.526	6.53	100	0.5	392	12006.1				13	3			2		3			2		2		4		2								153	3	1	34	1
346	U1429	B	11	H	2	92	94	93	93.54	180.518	6.03	100	0.5	356	11807.6	1			5				17				1	3		2		6			2			1		2		17	1		20				8
346	U1429	B	11	H	3	27	29	28	94.41	182.17	6.43	100	0.5	331	10295.5	1	1	2	10	2			8					2		5	1	10			4					2		6			42
346	U1429	B	11	H	4	27	29	28	95.92	185.035	5.742	100	0.5	365	12713.3				10	9			16		1		4	2		5		3			6					2		9	1	3	38	1			9
346	U1429	B	11	H	5	27	29	28	97.42	187.882	6.23	100	0.5	245	7865.17	1		2	22	18			7		4		1	1		4		20			1		2			3		5			19	1			4
346	U1429	B	11	H	6	27	29	28	98.92	190.729	7.96	100	0.5	306	7688.44	1	2		13	6			17	2	3		1	4		8	1	9		3	6					4		1	1	2	33			2	7
346	U1429	C	13	H	3	27	29	28	101.44	195.682	3.97	100	0.5	452	22770.8	2	1	3	6	6			9	1	5		1	6		1	1	9			2					4		39	1	4	28	2		1	11
346	U1429	C	13	H	4	27	29	28	102.94	199.203	4.47	100	0.5	615	27516.8	1	3		18	18			12	4	1		5			9		2		5	10		1			8		18	17	2	15				8
346	U1429	C	13	H	5	27	29	28	104.44	202.724	3.36	100	0.5	514	30595.2				13	14			8	1			3	1		12	1	10		1	1					12		25	4	1	33
346	U1429	C	13	H	6	27	29	28	105.94	206.245	4.78	100	0.5	583	24393.3	2		7	15	3			10	4			3	5		6		2		2						1		39	10	6	45	2		1	3
346	U1429	A	12	H	2	27	29	28	108.12	211.362	7.2	100	0.5	31	861.111				2	2				1	2							3											1	3	8
346	U1429	A	12	H	3	27	29	28	109.62	214.882	5.33	100	0.5	677	25403.4	1		1	22	7		1	13	7			5			6	4	2			10					10		5	15	1	36				5
346	U1429	A	12	H	4	27	29	28	111.12	218.403	5.13	100	0.5	348	13567.3	2		1	3	4			6	9	3		4			3	1	6		3			2			6		28	7	1	28				9
346	U1429	A	12	H	5	27	29	28	112.61	221.901	6.67	100	0.5	358	10734.6	1		1	4	3		1	10		4					7		19		8				1		4		10	3		20	3			1
346	U1429	B	13	H	5	27	29	28	115.57	228.849	5.13	100	0.5	334	13021.4	2		3	2	2			9		2		2	2		10		5		2			2			14		57	2	4	24
346	U1429	B	13	H	6	27	29	28	117.07	232.369	4.23	100	0.5	416	19669	1		9	5	4		1	8		5		2	4		5		8			1					7		1	3	2	32				5
346	U1429	B	13	H	7	27	29	28	118.58	235.914	5.1	100	0.5	640	25098		2	5	13	8		1	6	2	3		8	4		9	3	10			1			2		9		3	8		29	4		1	3
346	U1429	A	13	H	3	27	29	28	119.61	238.332	5.78	100	0.5	320	11072.7		1	4	10	14			1		3		2	3		1		14		2	3							1	1	2	13
346	U1429	A	13	H	3	112	113	112.5	120.455	239.994	4.24	100	0.5	120	5660.38	2	1	8	5	2			6							6		3						2		8		11	2		18
346	U1429	A	13	H	4	27	29	28	121.07	241.023	7.02	100	0.5	3	85.4701
346	U1429	A	15	H	2	27	29	28	127.53	251.825	5.43	100	0.5	220	8103.13	1		17		5			1				2			7		1		1						10		38	6	4	1				2
346	U1429	A	15	H	3	27	29	28	129.03	254.333	5.09	100	0.5	178	6994.11	1	1		8	10	7		3		4	1		3				7	1		1					1	3	6	2	7	3	1	2		5
346	U1429	B	16	H	3	27	29	28	131.41	258.312	4.77	100	0.5	170	7127.88			2	15	8	7		7			3				3		10								1		10	1	2	7				8
346	U1429	B	16	H	4	27	29	28	132.91	260.821	4.45	100	0.5	209	9393.26			5	4	7	1		5	1			3	2		2		10			1						2	5	7	2	15				6
346	U1429	B	16	H	5	27	29	28	134.41	263.329	4.09	100	0.5	255	12469.4	1		2	5	1		1	4		1			1		4		7			1			1	1	4		65			20				4
346	U1429	B	16	H	6	27	29	28	135.91	265.837	4.56	100	0.5	269	11798.2			6	17	9			4		2			3		5		10			1					4		12	1	1	6	1	4		18
346	U1429	C	18	H	5	27	29	28	138.91	270.853	4.57	100	0.5	217	9496.72	1		1	18	4		1	1		2		2	1		6		20			1					5		56	2	1	15	1	2		10
346	U1429	B	17	H	2	27	29	28	141.43	275.809	4.12	100	0.5	115	5582.52	2		5	15	4			15				3	1		6	2	6		1				1				6	3		24				1
346	U1429	B	17	H	5	27	29	28	145.93	288.242	3.2	100	0.5	226	14125	3	2		5	3			6		3		4	2		2	1	3		5	1		2			3	2	4	4	5	18			3	10
346	U1429	C	19	H	3	27	29	28	146.7	290.369	4.4	100	0.5	452	20545.5		1	3	19	6			8	1	1			10	1	3	1	5		4	1					4		3			17	1	2	1	9
346	U1429	C	19	H	4	27	29	28	148.2	294.514	3.91	100	0.5	331	16930.9	1		2	6	2			6		4			2		3		10		1	3		2			3		30	3		11		3		7
346	U1429	C	19	H	5	27	29	28	150.44	300.703	3.64	100	0.5	196	10769.2	1		1	1	8		1	3	1	5	1		2		5		13			4		2			3		41	2		16		2		4
346	U1429	C	19	H	6	27	29	28	151.23	302.885	4.448	100	0.5	173	7778.78	2	1		12	3			5				1			2		30		2	2							4		8	5				3
346	U1429	B	18	H	2	27	29	28	151.95	304.875	3.74	100	0.5	320	17112.3	2	1	2	17	8			5				2	1		1		26			6		5			1	1	9	3	1	10		1	2
346	U1429	B	18	H	3	27	29	28	153.45	309.019	3.64	100	0.5	235	12912.1	2	1		10	2			5		2			3		5		9		2	1		1			1		47	2		10	2	2	2
346	U1429	B	18	H	5	27	29	28	156.45	317.308	3.97	100	0.5	284	14307.3		1	2	11	3			4	1			4	2		5	6	17			4		4			4		24	7		14
346	U1429	C	20	H	3	27	29	28	157.18	319.325	4.3	100	0.5	234	10883.7			3	6	6			8				1	1		4	1			1			1			7		76	4		4			3	1
346	U1429	C	20	H	4	27	29	28	158.69	323.497	4.4	100	0.5	303	13772.7	1		5	3			6	11	1	1		3	1		2	1	10								6		6	5	3	9
346	U1429	C	20	H	4	70	71	70.5	159.115	324.671	2.96	100	0.5	115	7770.27				4				3							2													10		5
346	U1429	A	18	H	3	27	29	28	160.35	328.083	4.56	100	0.5	1	43.8596
346	U1429	B	19	H	1	27	29	28	161.77	332.007	4.68	100	0.5	330	14102.6	3		4	11	2			7	2	2		1			2		1		1	3					5	1	7	8	3	6				5
346	U1429	B	19	H	1	108	109	108.5	162.575	334.231	2.63	100	0.5	95	7224.33			4	11	3			31				3			2		2		1						2		7	2		11
346	U1429	B	19	H	2	27	29	28	163.27	336.151	3.8	100	0.5	223	11736.8	2		2	5	1			23	1	1		5			8		20		1						5		71	3		8				8
346	U1429	B	19	H	3	27	29	28	164.77	340.295	5.38	100	0.5	267	9925.65			3	14				12							1					3					7		119	1		4	1			12
346	U1429	B	19	H	3	69	70	69.5	165.185	341.442	2.79	100	0.5	37	2652.33		3	5	8				10		1					2		1		2			2					43			8
346	U1429	B	19	H	4	27	29	28	166.27	344.44	4.36	100	0.5	124	5688.07			2	5	1	1	1	4	1			3			4	1	6								2		5	3	2	17				2
346	U1429	B	19	H	5	27	29	28	167.77	348.584	5.33	100	0.5	188	7054.41		2	3	8	1			3		6		4		1	9	1	16		1								66	4	7	8
346	U1429	A	20	H	2	27	29	28	170.72	356.735	4.27	100	0.5	156	7306.79		2	3	8			1	23		2		1			6		27			3					2		108	2	1	5
346	U1429	A	20	H	3	27	29	28	171.51	358.917	4.06	100	0.5	109	5369.46		1	3	15	3			11	1			5			7		19			3			1		3		41	2	6		1			14
346	U1429	A	20	H	4	27	29	28	173.01	363.062	4.31	100	0.5	129	5986.08	1			6	2			16	1	3	1	1		1	5	1	3		2	2			2		4		4	3	4	6	1			3
346	U1429	A	20	H	5	27	29	28	174.49	367.151	4.58	100	0.5	117	5109.17			1	3				11	1	2	1	2		2	2		11			3					2		2	2	4	22
346	U1429	B	20	H	3	27	29	28	175.14	368.947	3.78	100	0.5	133	7037.04	1			8				12		4		2	1				24			4					1	1	3	2	5	5			3
346	U1429	B	20	H	4	27	29	28	176.64	373.091	4.8	100	0.5	136	5666.67				8	1			8		4	1	3	3		1		21			5					3		26	5	4	15				1
346	U1429	B	20	H	5	27	29	28	178.14	377.236	3.77	100	0.5	135	7161.8	2	1	2	5	2			11	2	5		3		1	2		9		1	1					10		5	5	3	19	1		1
346	U1429	A	21	H	2	27	29	28	180.02	382.43	4.13	100	0.5	210	10169.5	1			7				6		4		2			4		10			1		1	1		3		11	2		10				2
346	U1429	A	21	H	3	27	29	28	181.52	386.574	4.5	100	0.5	115	5111.11	1			1	1			4		9	1	2			1		12		1						1		19	3		7
															17398.2
[truncated: 111 more columns]

## Sheet: Feuil1
Age (ka)	Rads Absolute abundances (skel/g)	TOC (%)
1.51741	20234.4	1.39024
3.42074	21111.1	1.97
6.05209	29058.1	2.58
8.73606	23193.6	1.81
11.3674	15838.2	1.87
13.9987	9027.52	1.25
14.7267	9784.95	1.67
17.823	14285.7	1.59
20.4543	8610.57	1.69
25.717	16392.2	1.66
28.7167	18003.8	1.65
32.1375	12446.2	2.06
34.7688	10358.6	1.6
37.2894	17176.9	2.02
39.7511	12697.2	1.94
42.2129	15039.1	1.96
44.6911	22857.1	1.85
47.1529	17131.6	1.1
49.6147	13777.8	1.3
52.0765	16947.2	1.39
54.5383	19726.6	1.84
60.6106	16779.3	2.2
63.5812	7178.57	1.8
68.5048	13294.1	2.27
71.3445	24113.2	1.73
75.5526	18593.8	1.4
78.5161	23269.2	1.9
94.1436	16705.4	1.87
97.1071	189.753	2.15
99.4976	37.2439	2.27
102.461	23184.5	2.21
108.419	15390.6	1.99
115.519	33944.2	1.5
119.14	33214.3	1.26
120.122	21395.3	1.3
122.689	17470.4	1.06
130.499	8888.89	1.64
134.049	12382.8	1.57
137.599	11158.2	1.42
141.148	10744.8	1.31
144.698	12554.7	1.28
147.964	18433	1.29
149.123	12304.5	1.24
152.673	14040.4	1.14
156.321	14423.7	1.05
159.168	11850.4	1.32
162.015	10807.5	1.32
164.767	5244.57	1.46
167.67	11574.5	1.43
170.517	18683.7	1.56
172.813	14832.5	1.88
175.66	16505.6	1.35
178.526	12006.1	1.6
180.518	11807.6	1.83
182.17	10295.5	1.1
185.035	12713.3	1.53
187.882	7865.17	1.92
195.682	22770.8	0.16
199.203	27516.8	1.74
202.724	30595.2	1.52
211.362	861.111	2.16
214.882	25403.4	1.32
218.403	13567.3	2.17
221.901	10734.6	1.32
232.369	19669	0.21
235.914	25098	0.07
238.332	11072.7	1.41
239.994	5660.38	1.62
241.023	85.4701	1.68
254.333	6994.11	0.81
265.837	11798.2	2.09
270.853	9496.72	1.26
275.809	5582.52	1.62
288.242	14125	1.55
290.369	20545.5
294.514	16930.9	0.13
300.703	10769.2
302.885	7778.78
304.875	17112.3
309.019	12912.1
317.308	14307.3
319.325	10883.7
323.497	13772.7
324.671	7770.27	0.69
328.083	43.8596	0.94
332.007	14102.6
334.231	7224.33	0.93
336.151	11736.8
340.295	9925.65
341.442	2652.33
344.44	5688.07
348.584	7054.41
356.735	7306.79
358.917	5369.46
363.062	5986.08
367.151	5109.17
368.947	7037.04
373.091	5666.67
377.236	7161.8
382.43	10169.5
386.574	5111.11

## Sheet: Age estimation
E	Site	Hole	Core	Type	Sect	Interval Top (cm)	Interval Bottom (cm)	Interval Median (cm)	median CCSF-D (m)	Age (ka)	Sed. Rates (m/kyr)			Interval Median (cm)	median CCSF-D (m)	Age (ka)
346	U1429	A	1	H	1	27	29	28	0.45	0.789403				28	0.45	0.789403
346	U1429	A	1	H	1	69	70	69.5	0.865	1.51741				69.5	0.865	1.51741
346	U1429	A	1	H	2	27	29	28	1.95	3.42074				28	1.95	3.42074
346	U1429	A	1	H	3	27	29	28	3.45	6.05209				28	3.45	6.05209
346	U1429	A	1	H	3	69	70	69.5	3.865	6.78009				69.5	3.865	6.78009
346	U1429	A	1	H	3	109	110	109.5	4.265	7.48178				109.5	4.265	7.48178
346	U1429	B	2	H	2	27	29	28	4.98	8.73606				28	4.98	8.73606
346	U1429	B	2	H	2	109	110	109.5	5.795	10.1658				109.5	5.795	10.1658
346	U1429	B	2	H	3	27	29	28	6.48	11.3674				28	6.48	11.3674
346	U1429	B	2	H	4	27	29	28	7.98	13.9987				28	7.98	13.9987
346	U1429	B	2	H	4	69	70	69.5	8.395	14.7267				69.5	8.395	14.7267
346	U1429	A	2	H	3	27	29	28	10.16	17.823				28	10.16	17.823
346	U1429	A	2	H	4	27	29	28	11.66	20.4543				28	11.66	20.4543
346	U1429	A	2	H	5	27	29	28	13.16	23.0856				28	13.16	23.0856
346	U1429	A	2	H	6	27	29	28	14.66	25.717				28	14.66	25.717
346	U1429	B	3	H	3	27	29	28	16.37	28.7167				28	16.37	28.7167
346	U1429	B	3	H	4	27	29	28	17.87	31.3481				28	17.87	31.3481
346	U1429	A	3	H	2	27	29	28	18.32	32.1375				28	18.32	32.1375
346	U1429	A	3	H	3	27	29	28	19.82	34.7688				28	19.82	34.7688
									20.34	35.681	0.570051			28	21.32	37.2894
346	U1429	A	3	H	4	27	29	28	21.32	37.2894				28	22.82	39.7511
346	U1429	A	3	H	5	27	29	28	22.82	39.7511				28	24.32	42.2129
346	U1429	A	3	H	6	27	29	28	24.32	42.2129				28	25.83	44.6911
346	U1429	B	4	H	2	27	29	28	25.83	44.6911				28	27.33	47.1529
346	U1429	B	4	H	3	27	29	28	27.33	47.1529				28	28.83	49.6147
346	U1429	B	4	H	4	27	29	28	28.83	49.6147				28	30.33	52.0765
346	U1429	B	4	H	5	27	29	28	30.33	52.0765				28	31.83	54.5383
346	U1429	B	4	H	6	27	29	28	31.83	54.5383				113	33.38	57.0821
346	U1429	A	4	H	4	112	114	113	33.38	57.0821				28	34.03	58.1489
346	U1429	A	4	H	5	27	29	28	34.03	58.1489				28	35.53	60.6106
346	U1429	A	4	H	6	27	29	28	35.53	60.6106				28	37.34	63.5812
346	U1429	B	5	H	3	27	29	28	37.34	63.5812				28	38.84	66.043
346	U1429	B	5	H	4	27	29	28	38.84	66.043				28	40.34	68.5048
346	U1429	B	5	H	5	27	29	28	40.34	68.5048				28	41.84	71.3445
									40.71	69.112	0.609315			28	43.97	75.5526
346	U1429	B	5	H	6	27	29	28	41.84	71.3445				28	45.47	78.5161
346	U1429	A	5	H	5	27	29	28	43.97	75.5526				103	46.53	80.6103
346	U1429	A	5	H	6	27	29	28	45.47	78.5161				28	47.28	82.0921
346	U1429	B	6	H	2	102	104	103	46.53	80.6103				28	48.78	85.0555
346	U1429	B	6	H	3	27	29	28	47.28	82.0921				28	53.38	94.1436
346	U1429	B	6	H	4	27	29	28	48.78	85.0555				28	54.88	97.1071
346	U1429	C	8	H	1	27	29	28	53.38	94.1436				28	56.09	99.4976
346	U1429	C	8	H	2	27	29	28	54.88	97.1071				28	57.59	102.461
346	U1429	A	7	H	1	27	29	28	56.09	99.4976				28	59.09	105.425
346	U1429	A	7	H	2	27	29	28	57.59	102.461				28	60.59	108.419
346	U1429	A	7	H	3	27	29	28	59.09	105.425				28	62.09	111.969
									60.51	108.23	0.506161			28	63.59	115.519
346	U1429	A	7	H	4	27	29	28	60.59	108.419				28	65.12	119.14
346	U1429	A	7	H	5	27	29	28	62.09	111.969				69.5	65.535	120.122
346	U1429	A	7	H	6	27	29	28	63.59	115.519				28	66.62	122.689
346	U1429	B	8	H	3	27	29	28	65.12	119.14				28	68.12	126.239
346	U1429	B	8	H	3	69	70	69.5	65.535	120.122				28	69.62	129.789
346	U1429	B	8	H	4	27	29	28	66.62	122.689				28	69.92	130.499
346	U1429	B	8	H	5	27	29	28	68.12	126.239				28	71.42	134.049
346	U1429	B	8	H	6	27	29	28	69.62	129.789				28	72.92	137.599
346	U1429	C	10	H	2	27	29	28	69.92	130.499				28	74.42	141.148
346	U1429	C	10	H	3	27	29	28	71.42	134.049				28	75.92	144.698
346	U1429	C	10	H	4	27	29	28	72.92	137.599				129	77.3	147.964
346	U1429	C	10	H	5	27	29	28	74.42	141.148				28	77.79	149.123
346	U1429	C	10	H	6	27	29	28	75.92	144.698				28	79.29	152.673
346	U1429	A	9	H	1	128	130	129	77.3	147.964				28	80.79	156.321
346	U1429	A	9	H	2	27	29	28	77.79	149.123				28	82.29	159.168
346	U1429	A	9	H	3	27	29	28	79.29	152.673				28	83.79	162.015
									81	156.72	0.422561			28	85.24	164.767
346	U1429	A	9	H	4	27	29	28	80.79	156.321				28	86.77	167.67
346	U1429	A	9	H	5	27	29	28	82.29	159.168				28	88.27	170.517
346	U1429	A	9	H	6	27	29	28	83.79	162.015				28	89.48	172.813
346	U1429	B	10	H	4	27	29	28	85.24	164.767				28	90.98	175.66
346	U1429	B	10	H	5	27	29	28	86.77	167.67				28	92.49	178.526
346	U1429	B	10	H	6	27	29	28	88.27	170.517				93	93.54	180.518
346	U1429	A	10	H	3	27	29	28	89.48	172.813				28	94.41	182.17
346	U1429	A	10	H	4	27	29	28	90.98	175.66				28	95.92	185.035
346	U1429	A	10	H	5	27	29	28	92.49	178.526				28	97.42	187.882
346	U1429	B	11	H	2	92	94	93	93.54	180.518				28	98.92	190.729
346	U1429	B	11	H	3	27	29	28	94.41	182.17				28	101.44	195.682
346	U1429	B	11	H	4	27	29	28	95.92	185.035				28	102.94	199.203
346	U1429	B	11	H	5	27	29	28	97.42	187.882				28	104.44	202.724
346	U1429	B	11	H	6	27	29	28	98.92	190.729				28	105.94	206.245
									101.06	194.79	0.526924			28	108.12	211.362
346	U1429	C	13	H	3	27	29	28	101.44	195.682				28	109.62	214.882
346	U1429	C	13	H	4	27	29	28	102.94	199.203				28	111.12	218.403
346	U1429	C	13	H	5	27	29	28	104.44	202.724				28	112.61	221.901
346	U1429	C	13	H	6	27	29	28	105.94	206.245				28	115.57	228.849
346	U1429	A	12	H	2	27	29	28	108.12	211.362				28	117.07	232.369
346	U1429	A	12	H	3	27	29	28	109.62	214.882				28	118.58	235.914
346	U1429	A	12	H	4	27	29	28	111.12	218.403				28	119.61	238.332
346	U1429	A	12	H	5	27	29	28	112.61	221.901				112.5	120.455	239.994
346	U1429	B	13	H	5	27	29	28	115.57	228.849				28	121.07	241.023
346	U1429	B	13	H	6	27	29	28	117.07	232.369				28	127.53	251.825
346	U1429	B	13	H	7	27	29	28	118.58	235.914				28	129.03	254.333
346	U1429	A	13	H	3	27	29	28	119.61	238.332				28	131.41	258.312
									119.98	239.2	0.42603			28	132.91	260.821
346	U1429	A	13	H	3	112	113	112.5	120.455	239.994				28	134.41	263.329
346	U1429	A	13	H	4	27	29	28	121.07	241.023				28	135.91	265.837
346	U1429	A	15	H	2	27	29	28	127.53	251.825				28	138.91	270.853
346	U1429	A	15	H	3	27	29	28	129.03	254.333				28	141.43	275.809
346	U1429	B	16	H	3	27	29	28	131.41	258.312				28	145.93	288.242
346	U1429	B	16	H	4	27	29	28	132.91	260.821				28	146.7	290.369
346	U1429	B	16	H	5	27	29	28	134.41	263.329				28	148.2	294.514
346	U1429	B	16	H	6	27	29	28	135.91	265.837				28	150.44	300.703
346	U1429	C	18	H	5	27	29	28	138.91	270.853				28	151.23	302.885
									140.75	273.93	0.598042			28	151.95	304.875
346	U1429	B	17	H	2	27	29	28	141.43	275.809				28	153.45	309.019
346	U1429	B	17	H	5	27	29	28	145.93	288.242				28	156.45	317.308
346	U1429	C	19	H	3	27	29	28	146.7	290.369				28	157.18	319.325
346	U1429	C	19	H	4	27	29	28	148.2	294.514				28	158.69	323.497
346	U1429	C	19	H	5	27	29	28	150.44	300.703				70.5	159.115	324.671
346	U1429	C	19	H	6	27	29	28	151.23	302.885				28	160.35	328.083
346	U1429	B	18	H	2	27	29	28	151.95	304.875				28	161.77	332.007
346	U1429	B	18	H	3	27	29	28	153.45	309.019				108.5	162.575	334.231
346	U1429	B	18	H	5	27	29	28	156.45	317.308				28	163.27	336.151
346	U1429	C	20	H	3	27	29	28	157.18	319.325				28	164.77	340.295
346	U1429	C	20	H	4	27	29	28	158.69	323.497				69.5	165.185	341.442
346	U1429	C	20	H	4	70	71	70.5	159.115	324.671				28	166.27	344.44
346	U1429	A	18	H	3	27	29	28	160.35	328.083				28	167.77	348.584
									160.87	329.52	0.361936			28	170.72	356.735
346	U1429	B	19	H	1	27	29	28	161.77	332.007				28	171.51	358.917
346	U1429	B	19	H	1	108	109	108.5	162.575	334.231				28	173.01	363.062
346	U1429	B	19	H	2	27	29	28	163.27	336.151				28	174.49	367.151
346	U1429	B	19	H	3	27	29	28	164.77	340.295				28	175.14	368.947
346	U1429	B	19	H	3	69	70	69.5	165.185	341.442				28	176.64	373.091
346	U1429	B	19	H	4	27	29	28	166.27	344.44				28	178.14	377.236
346	U1429	B	19	H	5	27	29	28	167.77	348.584				28	180.02	382.43
346	U1429	A	20	H	2	27	29	28	170.72	356.735				28	181.52	386.574
346	U1429	A	20	H	3	27	29	28	171.51	358.917
346	U1429	A	20	H	4	27	29	28	173.01	363.062
346	U1429	A	20	H	5	27	29	28	174.49	367.151
346	U1429	B	20	H	3	27	29	28	175.14	368.947
346	U1429	B	20	H	4	27	29	28	176.64	373.091
346	U1429	B	20	H	5	27	29	28	178.14	377.236
346	U1429	A	21	H	2	27	29	28	180.02	382.43
346	U1429	A	21	H	3	27	29	28	181.52	386.574
									181.58	390.7	0.338509

## Sheet: Benthic Isotopes and Age (ka)
Site	Hole	Core	Type	Sect	W / A half	Interval Top (cm)	Interval Bottom (cm)	CCSF-D (cm)	δ 18O (‰ VPDB)+correction	CCSF-D (cm)	CCSF-D (m)	Age (ka)
U1429	A	1	H	1	W	5	7	22	2.536	22	0.22	0.23327
U1429	A	1	H	1	W	115	117	132	2.5905	132	1.32	3.5953
U1429	A	1	H	2	W	95	97	262	2.698	262	2.62	7.5686
U1429	A	1	H	3	W	95	97	412	3.017	412	4.12	10.677
U1429	B	2	H	2	W	125	127	595	3.274	595	5.95	13.672
U1429	B	2	H	4	W	30	32	800	3.648	800	8	17.028
U1429	B	2	H	5	W	20	22	940	3.845	940	9.4	19.218
U1429	A	2	H	3	W	65	67	1053	3.91	1053	10.53	20.919
U1429	A	2	H	4	W	35	37	1173	4.061	1173	11.73	22.725
U1429	A	2	H	5	W	5	7	1293	3.891	1293	12.93	24.53
U1429	A	2	H	5	W	125	127	1413	3.677	1413	14.13	26.336
U1429	A	2	H	6	W	95	97	1533	3.849	1533	15.33	28.142
U1429	B	3	H	3	W	50	52	1659	3.85	1659	16.59	30.038
U1429	B	3	H	4	W	35	37	1794	3.506	1794	17.94	32.07
U1429	A	3	H	2	W	110	112	1914	3.839	1914	19.14	33.876
U1429	A	3	H	3	W	80	82	2034	3.53	2034	20.34	35.681
U1429	A	3	H	4	W	50	52	2154	3.319	2154	21.54	37.487
U1429	A	3	H	5	W	20	22	2274	3.566	2274	22.74	39
U1429	A	3	H	5	W	140	142	2394	3.458	2394	23.94	40.409
U1429	A	3	H	6	W	110	112	2514	3.401	2514	25.14	41.818
U1429	B	4	H	2	W	80	82	2635	3.449	2635	26.35	43.238
U1429	B	4	H	3	W	50	52	2755	3.365	2755	27.55	44.647
U1429	B	4	H	4	W	20	22	2875	3.5	2875	28.75	46.335
U1429	B	4	H	4	W	140	142	2995	3.307	2995	29.95	48.127
U1429	B	4	H	5	W	110	112	3115	3.434	3115	31.15	49.92
U1429	B	4	H	6	W	80	82	3235	3.613	3235	32.35	51.713
U1429	A	4	H	4	W	125	127	3350	3.526	3350	33.5	53.431
U1429	A	4	H	5	W	95	97	3470	3.324	3470	34.7	55.296
U1429	A	4	H	6	W	65	67	3590	3.423	3590	35.9	58.055
U1429	B	5	H	3	W	5	7	3711	3.535	3711	37.11	60.836
U1429	B	5	H	3	W	125	127	3831	3.724	3831	38.31	63.595
U1429	B	5	H	4	W	95	97	3951	3.452	3951	39.51	66.354
U1429	B	5	H	5	W	65	67	4071	3.554	4071	40.71	69.112
U1429	B	5	H	6	W	35	37	4191	3.152	4191	41.91	71.871
U1429	A	5	H	4	W	95	97	4314	3.071	4314	43.14	74.698
U1429	A	5	H	5	W	95	97	4464	3.193	4464	44.64	78.126
U1429	A	5	H	6	W	80	82	4599	3.072	4599	45.99	81.209
U1429	B	6	H	3	W	20	22	4720	3.167	4720	47.2	83.223
U1429	B	6	H	4	W	5	7	4855	3.036	4855	48.55	85.215
U1429	B	6	H	4	W	130	132	4980	3.291	4980	49.8	87.09
U1429	C	8	H	1	W	110	112	5420	3.219	5420	54.2	95.774
U1429	A	7	H	1	W	110	112	5691	2.913	5691	56.91	101.12
U1429	A	7	H	2	W	80	82	5811	2.922	5811	58.11	103.49
U1429	A	7	H	3	W	50	52	5931	2.838	5931	59.31	105.86
U1429	A	7	H	4	W	20	22	6051	3.098	6051	60.51	108.23
U1429	A	7	H	5	W	5	7	6186	3.271	6186	61.86	112.75
U1429	A	7	H	5	W	125	127	6306	2.675	6306	63.06	117.27
U1429	A	7	H	6	W	95	97	6426	2.422	6426	64.26	121.79
U1429	B	8	H	3	W	65	67	6549	2.278	6549	65.49	126.85
U1429	B	8	H	4	W	35	37	6669	3.387	6669	66.69	131.01
U1429	B	8	H	5	W	5	7	6789	3.538	6789	67.89	133.7
U1429	B	8	H	5	W	125	127	6909	3.637	6909	69.09	136.39
U1429	C	10	H	2	W	80	82	7044	3.66	7044	70.44	139.42
U1429	C	10	H	3	W	20	22	7134	3.823	7134	71.34	141.04
U1429	C	10	H	3	W	140	142	7254	3.73	7254	72.54	142.97
U1429	C	10	H	4	W	110	112	7374	3.74	7374	73.74	144.91
U1429	C	10	H	5	W	75	77	7489	3.958	7489	74.89	146.77
U1429	C	10	H	6	W	50	52	7614	3.663	7614	76.14	148.78
U1429	A	9	H	1	W	140	142	7741	3.803	7741	77.41	150.83
U1429	A	9	H	2	W	110	112	7861	3.857	7861	78.61	152.77
U1429	A	9	H	3	W	80	82	7981	3.899	7981	79.81	154.71
U1429	A	9	H	4	W	49	51	8100	3.949	8100	81	156.72
U1429	A	9	H	5	W	20	22	8221	3.797	8221	82.21	158.78
U1429	A	9	H	5	W	140	142	8341	3.853	8341	83.41	160.82
U1429	B	10	H	3	W	125	127	8466	3.881	8466	84.66	162.95
U1429	B	10	H	4	W	95	97	8591	3.915	8591	85.91	165.08
U1429	B	10	H	5	W	65	67	8714	3.562	8714	87.14	167.2
U1429	B	10	H	6	W	35	37	8834	3.553	8834	88.34	169.46
U1429	A	10	H	3	W	35	37	8955	3.517	8955	89.55	171.74
U1429	A	10	H	4	W	5	7	9075	3.229	9075	90.75	174
U1429	A	10	H	4	W	125	127	9195	3.3	9195	91.95	176.06
U1429	A	10	H	5	W	95	97	9316	3.485	9316	93.16	178.15
U1429	B	11	H	3	W	15	17	9428	3.622	9428	94.28	180.07
U1429	B	11	H	3	W	140	142	9553	3.375	9553	95.53	182.22
U1429	B	11	H	4	W	140	142	9704	3.527	9704	97.04	184.82
U1429	B	11	H	5	W	125	127	9839	3.437	9839	98.39	188.12
U1429	B	11	H	6	W	95	97	9959	3.441	9959	99.59	191.12
U1429	C	13	H	2	W	140	142	10106	3.149	10106	101.06	194.79
U1429	C	13	H	3	W	110	112	10226	2.969	10226	102.26	197.78
U1429	C	13	H	4	W	80	82	10346	2.489	10346	103.46	200.78
U1429	C	13	H	5	W	50	52	10466	3.06	10466	104.66	203.61
U1429	C	13	H	6	W	20	22	10586	2.671	10586	105.86	206.44
U1429	A	12	H	2	W	125	127	10909	2.716	10909	109.09	214.06
U1429	A	12	H	3	W	95	97	11029	2.618	11029	110.29	216.89
U1429	A	12	H	4	W	65	67	11149	3.161	11149	111.49	219.54
U1429	A	12	H	5	W	35	37	11268	3.21	11268	112.68	222.17
U1429	A	12	H	6	W	5	7	11383	3.362	11383	113.83	224.72
U1429	B	13	H	4	W	125	127	11504	3.341	11504	115.04	227.4
U1429	B	13	H	5	W	110	112	11639	3.393	11639	116.39	230.38
U1429	B	13	H	6	W	80	82	11759	3.098	11759	117.59	233.04
U1429	B	13	H	7	W	50	52	11880	2.687	11880	118.8	235.72
U1429	A	13	H	3	W	65	67	11998	2.657	11998	119.98	239.2
U1429	A	15	H	1	W	70	72	12645	2.978	12645	126.45	243.57
U1429	A	15	H	2	W	35	37	12760	3.421	12760	127.6	246.07
U1429	A	15	H	3	W	5	7	12880	3.355	12880	128.8	248.69
U1429	A	15	H	3	W	125	127	13000	3.587	13000	130	251.31
U1429	B	16	H	2	W	125	127	13106	3.464	13106	131.06	253.55
U1429	B	16	H	3	W	110	112	13223	3.447	13223	132.23	256.01
U1429	B	16	H	4	W	80	82	13343	3.468	13343	133.43	258.54
U1429	B	16	H	5	W	50	52	13463	3.423	13463	134.63	261.06
U1429	B	16	H	6	W	20	22	13583	3.467	13583	135.83	263.59
U1429	B	16	H	7	W	5	7	13709	3.683	13709	137.09	266.24
U1429	C	18	H	4	W	125	127	13838	3.722	13838	138.38	268.95
U1429	C	18	H	5	W	95	97	13958	3.883	13958	139.58	271.47
U1429	B	17	H	1	W	110	112	14075	3.617	14075	140.75	273.93
U1429	B	17	H	2	W	80	82	14195	3.578	14195	141.95	276.46
U1429	B	17	H	3	W	65	67	14330	3.335	14330	143.3	279.29
U1429	B	17	H	4	W	35	37	14450	3.228	14450	144.5	281.82
U1429	B	17	H	5	W	5	7	14570	2.974	14570	145.7	284.71
U1429	C	19	H	3	W	50	52	14692	2.983	14692	146.92	288.31
U1429	C	19	H	4	W	20	22	14812	3.236	14812	148.12	291.85
U1429	C	19	H	4	W	140	142	14932	3.148	14932	149.32	295.4
U1429	C	19	H	5	W	110	112	15055	3.204	15055	150.55	299.03
U1429	B	18	H	2	W	5	7	15172	3.074	15172	151.72	302.49
U1429	B	18	H	2	W	125	127	15292	2.854	15292	152.92	306.03
U1429	B	18	H	3	W	95	97	15412	2.998	15412	154.12	309.58
U1429	B	18	H	4	W	65	67	15532	2.879	15532	155.32	313.12
U1429	B	18	H	5	W	35	37	15652	2.614	15652	156.52	316.67
U1429	C	20	H	3	W	80	82	15770	2.956	15770	157.7	320.15
U1429	C	20	H	4	W	50	52	15891	2.485	15891	158.91	323.73
U1429	A	18	H	3	W	80	82	16087	2.327	16087	160.87	329.52
U1429	B	19	H	1	W	50	52	16199	2.507	16199	161.99	332.83
U1429	B	19	H	2	W	20	22	16319	3.149	16319	163.19	336.37
U1429	B	19	H	3	W	20	22	16469	3.398	16469	164.69	340.8
U1429	B	19	H	4	W	5	7	16604	3.649	16604	166.04	344.79
U1429	B	19	H	4	W	125	127	16724	3.655	16724	167.24	348.34
U1429	B	19	H	5	W	95	97	16844	3.61	16844	168.44	351.88
U1429	B	19	H	6	W	65	67	16964	3.37	16964	169.64	355.43
U1429	A	20	H	2	W	110	112	17083	3.4885	17083	170.83	358.94
U1429	A	20	H	3	W	95	97	17218	3.599	17218	172.18	362.93
U1429	A	20	H	5	W	5	7	17426	3.565	17426	174.26	369.07
U1429	B	20	H	3	W	65	67	17551	3.223	17551	175.51	372.77
U1429	B	20	H	4	W	35	37	17671	3.366	17671	176.71	376.31
U1429	B	20	H	5	W	5	7	17791	3.031	17791	177.91	379.86
U1429	B	20	H	5	W	125	127	17911	2.961	17911	179.11	383.4
U1429	A	21	H	2	W	65	67	18039	2.918	18039	180.39	387.18
U1429	A	21	H	3	W	35	37	18158	3.149	18158	181.58	390.7

## Sheet: (%)
median CCSF-D (m)		Age (ka)	Sed. Rates	Rads Absolute abundances (skel/g)	Average dry bulk density	RAR	Acanthodesmia vinculata	Anthocyrtidium zanguebaricum/ophirense	Archipera triclavigera	Arachnocoralium calvata	Arachnocorys castanerides	Amphimelissa setosa	Botryostrobus aquilonaris	Botryostrobus auritus/australis gr.	Botryopyle scatum	Carpocanarium papillosum	Carpocanistrum ensigerum	Cornutella profunda	Corocalyptra cervus	Corocalyptra kruegeri	Cycladophora bicornis	Cycladophora cornuta	Cycladophora davisiana	Dictyophimus crisiae	Eucecryphalus sp.	Eucyrtidium acuminatum	Eucyrtidium anomalus	Eucyrtidium sp.	Lamprocyclas maritalis	Lampromitra cracenta	Lampromitra erosa	Liriospyris leticulata	Lithomelissa setosa	Lophophaena hispida	Lophophaena thoracites	Lophophaena spp.	Lophospylis pentagona	Peridium spinipes	Peryphiramis circumtexta	Phormacantha hystrix	Phormospyris stabilis	Phormospyris stabilis capoi	Plectacantha oikiskos	Pseudocubus obeliscus	Pseudodictyophimus gracilipes	Pterocanium praetextum	Pterocanium trilobum	Pterocorys claudas	Stichocorys seriata
0.45		0.789403	57.0051	37768.9	1.5	3229533.59064513	0.998573	0.570613	1.71184	3.85164	3.13837	0	0	0.85592	0.713267	0.570613	0	0.42796	0	0.285307	0.85592	0.285307	0	0	1.14123	0.998573	0.42796	0	0	0	2.99572	0.285307	2.71041	3.70899	1.85449	3.42368	0	0	0	0	0.42796	0.142653	1.71184	3.99429	2.71041	0.285307	0.285307	1.28388	0.85592
0.865	0.415	1.51741	57.0051	20234.4	1.5	1730194.72898742	0	0	4.77941	5.14706	4.04412	0	0	1.47059	0	1.10294	0	1.10294	0	0	0	0	0.367647	0	0.735294	0.735294	0.735294	0	1.10294	0	0	0.367647	0	0.735294	2.20588	2.57353	0	0	0	0	1.10294	0.367647	0.367647	1.47059	1.47059	0	0	0.735294	0.367647
1.95	1.085	3.42074	57.0051	21111.1	1.5	1805162.41136739	0.566038	0.188679	2.07547	5.09434	3.96226	0	0	1.50943	0.566038	0.188679	0.188679	0.377358	0.377358	0	1.50943	0	0.188679	0	0.566038	0.566038	1.13208	0	0	0	2.64151	0	2.45283	2.83019	2.07547	3.39623	1.13208	0	0	0	0.754717	0	1.69811	4.90566	3.39623	0.566038	0	1.50943	1.69811
3.45	1.5	6.05209	57.0051	29058.1	1.5	2484692.48690481	0.691563	0.691563	1.38313	4.56432	3.45781	0	0	0.829876	0.968188	0.276625	0	0.829876	0.55325	0	1.93638	0	0	0	0.138313	0.968188	0.414938	0	0.276625	0	2.62794	0	1.1065	3.18119	2.07469	4.01107	0.414938	0	0	0	0.691563	0	2.90456	5.94744	1.52144	1.38313	0	1.38313	1.93638
3.865	0.415	6.78009	57.0051	21621.6	1.5	1848814.9874602	0.70922	0	3.90071	5.67376	1.06383	0	0	1.77305	1.41844	0	0	0.35461	0	0	0.35461	0	0.70922	0	0	1.77305	0	0	0	0	1.06383	0	0.70922	2.12766	1.41844	4.60993	0	0	0	0	0.70922	6.38298	0.35461	0	0	1.41844	0	0	0
4.265	0.4	7.48178	57.0051	18059.1	1.5	1544189.56442088	1.21581	1.21581	0.911854	6.68693	0.911854	0	0	4.25532	0.303951	0	0	0.303951	0	0	2.12766	0	0	0	0	0	1.51976	0.303951	0.303951	0	1.82371	0	0.911854	1.51976	0.911854	7.29483	0	0	0	0.911854	1.21581	0	2.12766	4.25532	2.12766	0.911854	0	0.911854	0.607903
4.98	0.715	8.73606	57.0051	23193.6	1.5	1983232.32462236	0.17301	0.519031	2.76817	6.05536	4.84429	0	0	1.38408	0.17301	0.519031	0	0.692042	0.346021	0	1.55709	0.17301	0.692042	0	1.21107	0	0.17301	0.346021	0	0	2.94118	0	3.63322	0.865052	0.865052	4.84429	0.519031	0	0	0	0.346021	0	3.2872	12.9758	5.70934	0.17301	0	1.21107	1.55709
5.795	0.815	10.1658	57.0051	4494.38	1.5	384304.238966447	0.381679	0.381679	1.9084	3.43511	6.48855	0	0	3.81679	0.381679	0	0.763359	1.52672	0	0	2.67176	0	0.763359	0	1.52672	0.381679	0	0	0	0	2.29008	0.381679	2.29008	0.381679	1.52672	5.34351	0	0	0	1.52672	0	0	5.34351	6.48855	5.34351	0.381679	0	1.9084	0
6.48	0.685	11.3674	57.0051	15838.2	1.5	1354283.69529419	0.661157	0.165289	2.14876	4.46281	6.28099	0	0.495868	2.97521	0	0.330579	0.165289	0.495868	0.991736	0	0.991736	0.330579	0.330579	0	0.495868	0.991736	0	0.330579	0.165289	0	3.47107	0.330579	1.98347	0.495868	3.96694	4.29752	0.330579	0	0.330579	0	0.661157	0	2.97521	5.78512	5.45455	0.330579	0.165289	0.826446	1.4876
7.98	1.5	13.9987	57.0051	9027.52	1.5	771922.661278109	0.217865	0.43573	7.40741	4.13943	6.97168	0	0	0	0	0	0	0.43573	0.87146	0	0.87146	0.217865	0	0	0.217865	0.653595	0	0.653595	0	0	2.39651	0	29.4118	0.217865	3.48584	3.05011	0	0	0	0	0	0	0.653595	9.58606	3.26797	0.43573	0.217865	0.43573	0.87146
8.395	0.415	14.7267	57.0051	9784.95	1.5	836688.180480982	0	0.8	0	2.4	4	0	0.4	4	0	0	0	0.4	0	0	1.2	0	0	0	1.2	0	0	0	0	0	0	0	37.2	0.8	1.6	2.4	0	0	0	0	0.4	0	2.8	0.8	4	0.4	0	0	0
10.16	1.765	17.823	57.0051	14285.7	1.5	1221538.47385764	0.421941	0	2.1097	2.95359	9.49367	0	0	1.68776	0	0	0	0	0.632911	0	1.47679	0	0.632911	0	0.421941	0	0	0.21097	0	0	1.47679	0	44.3038	0.421941	0.843882	2.95359	0	0	0	0	0	0	0.632911	4.85232	1.68776	0	0	0.843882	0.632911
11.66	1.5	20.4543	57.0051	8610.57	1.5	736269.765064876	0.191205	0	0.573614	3.25048	3.25048	0	0	0.382409	0	0.573614	0	0.764818	0	0	0.764818	0	1.72084	0	0	1.33843	0	0.382409	0.382409	0	2.29446	0	39.1969	0.764818	4.78011	1.14723	0	0	0	0	0	0	0.956023	3.44168	3.63289	0.764818	0	1.14723	0.956023
13.16	1.5	23.0856	57.0051	9312.38	1.5	796279.893174781	0	0	0.88968	5.16014	3.20285	0	0	0	0.177936	0.711744	0	0.533808	0.355872	0	1.42349	0.177936	1.06762	0	0	0.533808	0.177936	0.711744	0	0	1.60142	0	15.3025	0.533808	5.33808	2.84698	1.24555	0	0.355872	0	0	0	1.77936	6.76157	6.76157	0.88968	0	0.711744	1.42349
14.66	1.5	25.717	57.0051	16392.2	1.5	1401655.51941468	0	0	0.540541	5.94595	0	0	0	0	0	0.810811	0	0.540541	0	0	0.27027	0	0.810811	0	0.27027	0.540541	0	0.27027	0	0	0.810811	0	28.6486	0	0.810811	4.59459	0	0	0	0.810811	1.62162	0	0	5.67568	4.59459	0	0.810811	0.540541	1.62162
16.37	1.71	28.7167	57.0051	18003.8	1.5	1539460.53993508	0.419287	0	1.46751	5.24109	0	0	0	0	0	0	0	0.838574	0	0	2.30608	0	0.209644	0	0	0.628931	0	0.419287	0	0	1.67715	0	23.4801	1.04822	1.25786	5.66038	0	0	0	0.628931	0.419287	0	0	4.8218	4.8218	0.838574	0	0.838574	1.04822
17.87	1.5	31.3481	57.0051	4392.16	1.5	375563.201374269	0.623053	0	0.934579	4.04984	1.86916	0	0	0	0.623053	0	0	0.623053	0	0	2.49221	0	0.934579	0	0.623053	0.623053	0	0	0	0	1.24611	0.311526	11.215	0	0	4.6729	0	0	0	0	1.55763	0	0	2.49221	0.934579	0.311526	0	1.24611	2.49221
18.32	0.45	32.1375	57.0051	12446.2	1.5	1064244.47859377	0	0	1.00334	1.00334	0.334448	0	0	1.17057	0.167224	0.334448	0	0.668896	0.501672	0	2.00669	0	0.334448	0	0	0.668896	0	0	0.167224	0	1.67224	0	28.5953	0.334448	0	2.34114	0	0	0.334448	0.668896	1.17057	0	0	6.35452	0.83612	0	1.00334	0.334448	1.00334
19.82	1.5	34.7688	57.0051	10358.6	1.5	885737.060725457	0	0.207469	0.414938	2.07469	1.65975	0	0.207469	0	0.207469	1.24481	0	1.45228	1.24481	0	0.207469	0	0.622407	0	0.207469	0.622407	0	0.414938	0.622407	0	1.65975	0	5.80913	0.207469	2.28216	4.77178	0.414938	0	0	3.11203	0.829876	0	0	5.18672	4.97925	1.24481	0	1.03734	3.3195
21.32	1.5	37.2894	59.5105	17176.9	1.5	1533312.72028918	0	0.688073	1.83486	2.06422	1.6055	0	0.458716	0	0	0	0	0.688073	0.229358	0	1.37615	0	0.229358	0	0.229358	0.229358	0	0.917431	0	0	1.14679	0	30.7339	0.688073	0.917431	2.06422	0.458716	0	0	2.52294	1.37615	0	0	2.98165	3.89908	0.688073	0	1.37615	0.688073
22.82	1.5	39.7511	60.9315	12697.2	1.5	1160492.96661699	0.199601	0	0.199601	1.39721	0.199601	0	0.399202	0.798403	0.199601	0	0.598802	0.399202	0	0	0.998004	0.199601	0.399202	0	0	0.998004	0	0.399202	0	0	2.59481	0	32.7345	1.79641	2.39521	1.59681	1.59681	0	0.199601	2.59481	0.399202	0	0	5.38922	4.79042	0.199601	0	0.798403	1.79641
24.32	1.5	42.2129	60.9315	15039.1	1.5	1374528.29615476	0	0	1.0352	4.34783	1.0352	0	0.414079	1.0352	0	0.621118	0	0	0	0	1.24224	0	0.207039	0	0.414079	0.621118	0	0.207039	0	0	1.65631	0	43.6853	0.414079	0	2.27743	0	0	0	0	0.414079	0	0	4.34783	2.48447	0.828157	0	0.414079	1.65631
25.83	1.51	44.6911	60.9315	22857.1	1.5	2089078.99853429	0	0.341297	0.341297	2.73038	1.19454	0	0.170648	0.853242	0	0.511945	0	0	0	0	0.853242	0.341297	0.341297	0	0.341297	0.682594	0	0	0	0	0	0	29.8635	0	2.21843	3.24232	1.36519	0	0	0.511945	1.36519	0	0	8.19113	4.09556	0.682594	0	2.04778	2.21843
27.33	1.5	47.1529	60.9315	17131.6	1.5	1565783.17866568	0.925926	0.694444	0.231481	5.78704	1.85185	0	0.925926	0	0	0	0	0.231481	0	0	0.694444	0	0	0	0	0.462963	0	0	0.231481	0	2.08333	0	19.213	0.925926	2.08333	3.47222	2.08333	0	0.462963	3.47222	0	0	0	4.16667	1.85185	0	0	2.08333	2.08333
28.83	1.5	49.6147	60.9315	13777.8	1.5	1259250.39633873	0	0	0.438596	2.63158	2.85088	0	0	1.75439	0.219298	0.438596	0	1.09649	1.53509	0	1.31579	0.219298	0	0	0	0.219298	0	0	0	0	1.75439	0	31.5789	1.09649	0.219298	3.72807	1.09649	0	0.219298	0.438596	0	0	0	5.48246	4.38596	0.657895	0	0.438596	2.19298
30.33	1.5	52.0765	60.9315	16947.2	1.5	1548923.2985708	0.351494	0.702988	0	4.21793	0.702988	0	0	0	0.351494	0.351494	0	1.23023	0.702988	0	0.702988	0.175747	0	0	0	1.40598	0	0	0	0	2.10896	0	20.5624	1.05448	0.527241	5.09666	0.878735	0	0	1.58172	0	0	0	10.1933	7.38137	0.878735	0	0.527241	1.58172
31.83	1.5	54.5383	60.9315	19726.6	1.5	1802952.70015106	0.608519	0	1.41988	6.89655	0	0	0.20284	1.62272	0.20284	0	0	0.40568	0	0	0	0.20284	0.40568	0	0	0.20284	0	0	0	0	1.62272	0	16.8357	1.21704	2.43408	2.63692	0	0	0.811359	2.83976	0.811359	0.20284	0	11.5619	7.50507	0	0	0.608519	0.811359
33.38	1.55	57.0821	60.9315	7892.72	1.5	721372.585221852	0.40404	0.20202	0.20202	3.43434	2.0202	0	0.20202	1.0101	0	0	0	1.61616	0.808081	0	1.81818	0	0.606061	0	0	0.20202	0	0	0	0	3.23232	0	3.0303	0.40404	1.41414	3.63636	0	0	0	4.24242	1.41414	0	0	7.87879	6.26263	0.40404	0	1.41414	3.63636
34.03	0.65	58.1489	60.9315	17326	1.5	1583548.66395307	0	0.433839	0	6.29067	1.51844	0	0.21692	2.1692	0.433839	0	0.21692	0.650759	0	0	0.650759	0	0.21692	0	0.650759	0.867679	0	0.867679	0	0	3.90456	0	3.47072	1.73536	2.60304	4.33839	0.21692	0	0.433839	2.38612	0.650759	0	0	10.1952	5.20607	0	0	0	1.73536
35.53	1.5	60.6106	60.9315	16779.3	1.5	1533583.34037532	0	0.201613	0	2.01613	0.201613	0	0.403226	0.403226	0.403226	0.604839	0.403226	0.403226	0.201613	0	0.201613	0.403226	0	0	0.403226	0	0	0.604839	0	0	1.41129	0	39.3145	0.403226	1.00806	3.22581	0	0	0	4.6371	0	0	0	4.43548	3.83065	0	0	0.604839	1.41129
37.34	1.81	63.5812	60.9315	7178.57	1.5	656101.372977177	0	0	1.21704	2.43408	1.41988	0	0.20284	2.0284	0.20284	0.608519	0	1.41988	0	0	1.82556	0	0	0	0	0.811359	0	0	0	0	0.20284	0	11.359	1.41988	1.41988	3.24544	0	0	0	0.608519	0	0.40568	1.41988	4.66531	3.44828	1.41988	0	1.0142	3.0426
38.84	1.5	66.043	60.9315	11402.6	1.5	1042161.22171872	0	0	1.28205	2.5641	0.854701	0	0.213675	0	0	0.42735	0	0.641026	0	0	1.06838	0	0.42735	0	0	0.641026	0	0	0	0	1.06838	0	23.9316	1.28205	2.5641	4.48718	0	0	0.42735	2.35043	0.42735	0	1.7094	6.41026	2.77778	0.641026	0.213675	0.641026	1.49573
40.34	1.5	68.5048	60.9315	13294.1	1.5	1215045.21164752	0.759013	0.189753	0.759013	4.36433	0.56926	0	0	0.56926	0.379507	0.948767	0	0.759013	0	0	1.13852	0	0.948767	0	0	0	0	0	0.189753	0	0.379507	0	29.4118	0.948767	1.13852	5.88235	0	0	0	0.56926	0.189753	0	0.948767	3.41556	3.03605	0.189753	0.379507	0.948767	1.51803
41.84	1.5	71.3445	52.8219	24113.2	1.5	1910557.99557065	0	0.15748	0.314961	5.66929	6.14173	0	0	2.67717	0.314961	0.787402	0	0.629921	0.314961	0	0.787402	0.15748	0.629921	0	0.314961	0.472441	0	0	0	0.15748	0.314961	0	18.7402	1.10236	2.20472	6.61417	0	0	0.15748	0.15748	1.10236	0	4.56693	4.09449	1.88976	0.787402	0	0.787402	2.3622
43.97	2.13	75.5526	50.6161	18593.8	1.5	1411714.2364129	0	0	0.419287	7.96646	4.8218	0	0	1.25786	0.209644	0.628931	0	0.419287	0.838574	0	0.838574	0.838574	0.838574	0	0.628931	0	0	0	0	0	0.419287	0	8.80503	1.67715	1.46751	3.3543	0	0	0.419287	0	0.209644	0	6.91824	6.28931	2.93501	0.838574	0	1.04822	1.04822
45.47	1.5	78.5161	50.6161	23269.2	1.5	1766696.03212371	0.327869	0.163934	1.31148	4.42623	5.7377	0	0.491803	1.47541	0	0.163934	0.163934	0.819672	0.327869	0	2.29508	0.163934	0.163934	0	0.327869	0.491803	0	0	0	0	1.47541	0	6.06557	2.95082	1.31148	5.2459	0.327869	0	0.327869	0.819672	0.327869	0	1.14754	2.62295	3.77049	0.327869	0	2.13115	1.63934
46.53	1.06	80.6103	50.6161	26401.6	1.5	2004517.70688818	0.610687	0.458015	1.22137	4.42748	6.56489	0	0	0.916031	0.152672	0.458015	0.610687	0.610687	0	0	1.83206	0	0	0	0.916031	1.37405	0	0	0	0	2.59542	0	7.48092	1.83206	0.916031	3.20611	0	0	0.152672	0.152672	0.305344	0	4.73282	5.49618	2.59542	0.305344	0	1.52672	1.98473
47.28	0.75	82.0921	50.6161	13834.6	1.5	1050378.89985457	0.673401	0	0.505051	1.51515	4.0404	0	0	1.85185	0.16835	0.3367	0	0.16835	0.16835	0	1.17845	0	0.3367	0	0.673401	0.673401	0	0	0	0	1.6835	0	19.1919	1.51515	2.18855	4.7138	0	0	0	0.3367	0.16835	0	3.7037	2.86195	1.85185	0.673401	0	0.841751	1.3468
48.78	1.5	85.0555	50.6161	13005.9	1.5	987461.140947679	0.371058	0	0.927644	2.5974	3.15399	0	0	1.2987	0	0.556586	0	0.556586	0.371058	0	1.66976	0.371058	1.85529	0	0	0.556586	0	0	0	0	1.2987	0	3.33952	1.2987	1.2987	7.23562	0	0	0.742115	1.11317	1.48423	0	3.33952	4.82375	1.48423	0.927644	0	0.556586	1.48423
53.38	4.6	94.1436	50.6161	16705.4	1.5	1268344.9122928	0.374532	0.374532	1.1236	3.93258	2.43446	0	0	1.1236	0.561798	0.93633	0	0.749064	0.187266	0	1.31086	0.187266	0	0	0.187266	0.749064	0	0	0	0	1.68539	0	8.98876	1.68539	2.43446	2.80899	0.749064	0	0.374532	1.68539	5.05618	0	0.561798	1.87266	3.37079	0.561798	0	0.374532	2.05993
54.88	1.5	97.1071	50.6161	189.753	1.5	14406.8552182842	0.490196	0	0.490196	2.45098	2.45098	0	0	3.43137	0	0.490196	0	0.490196	0.490196	0.490196	0.980392	0	0.490196	0	0.980392	0.490196	0	0	0	0	2.94118	0	7.84314	0.980392	0	2.94118	0	0	0	0	1.47059	0	1.96078	1.47059	1.96078	0.980392	0	0	0.490196
56.09	1.21	99.4976	50.6161	37.2439	1.5	2827.71422720141	#DIV/0!	#DIV/0!	#DIV/0!	#DIV/0!	#DIV/0!	#DIV/0!	#DIV/0!	#DIV/0!	#DIV/0!	#DIV/0!	#DIV/0!	#DIV/0!	#DIV/0!	#DIV/0!	#DIV/0!	#DIV/0!	#DIV/0!	#DIV/0!	#DIV/0!	#DIV/0!	#DIV/0!	#DIV/0!	#DIV/0!	#DIV/0!	#DIV/0!	#DIV/0!		#DIV/0!	#DIV/0!	#DIV/0!	#DIV/0!	#DIV/0!	#DIV/0!	#DIV/0!	#DIV/0!	#DIV/0!	#DIV/0!	#DIV/0!	#DIV/0!	#DIV/0!	#DIV/0!	#DIV/0!	#DIV/0!
57.59	1.5	102.461	50.6161	23184.5	1.5	1760260.34249373	0.334448	0.334448	3.67893	5.68562	0.668896	0	0	1.67224	0.501672	0.83612	0	0.668896	0.167224	0	0.167224	0.167224	0.167224	0	0.334448	0.668896	0	0	0	0	0.334448	0	8.19398	1.50502	3.01003	1.00334	0	0	0	0.167224	2.34114	0	4.34783	5.18395	4.01338	1.33779	0	1.00334	0.668896
59.09	1.5	105.425	50.6161	19696.4	1.5	1495431.5716579	0.191939	0	1.53551	4.9904	5.18234	0	0	1.34357	0.767754	0.191939	0.191939	0.191939	0.959693	0	0.767754	0.191939	0.191939	0	0.959693	0.575816	0	0	0	0	1.34357	0	3.07102	1.34357	2.11132	2.11132	1.34357	0	0	1.15163	0.383877	0	0.383877	4.60653	1.53551	0.575816	0	1.53551	0.959693
60.59	1.5	108.419	50.0876	15390.6	1.5	1156318.91310327	0	0	3.46021	4.15225	5.53633	0	0	1.03806	0.346021	0.346021	0.17301	0.346021	0.519031	0	1.21107	0.346021	0.519031	0	0.346021	0.865052	0	0.17301	0	0	1.38408	0	6.05536	0.865052	0.17301	5.88235	0.519031	0	0	0.865052	1.38408	0	1.7301	1.55709	2.76817	0.519031	0	0.692042	1.90311
62.09	1.5	111.969	42.2561	28247	1.5	1790414.33769973	0	0	0.849858	3.54108	1.41643	0	0	1.983	0.424929	0.424929	0.283286	0.849858	0.566572	0.141643	1.41643	0.283286	0.424929	0	0	0.566572	0	0	0	0	1.55807	0	20.255	0.849858	0.991501	5.38244	0.991501	0	0.283286	0.141643	0.141643	0	0.849858	3.25779	2.40793	0.566572	0	1.13314	1.27479
63.59	1.5	115.519	42.2561	33944.2	1.5	2151527.5256984	0.591017	0.118203	2.36407	4.49173	2.00946	0	0	1.65485	0.472813	1.06383	0.472813	0.591017	0.827423	0.236407	0.827423	0.35461	0.472813	0	0.35461	0	0	0	0	0	1.65485	0	3.30969	0.945626	1.41844	3.6643	1.18203	0	0.35461	0.35461	0.70922	0	1.30024	1.89125	1.77305	0	0	0	0.945626
65.12	1.53	119.14	42.2561	33214.3	1.5	2105261.02583744	0.121065	0.726392	1.08959	3.02663	1.93705	0	0	1.45278	1.33172	0.484262	0.121065	0.605327	0.484262	0.484262	0.726392	0	0.242131	0.121065	0.484262	0.121065	0	0	0	0	1.45278	0	1.81598	2.30024	0.847458	5.9322	0.605327	0	0.242131	0.847458	0.242131	0	1.33172	4.60048	1.33172	1.08959	0	1.45278	0.726392
65.535	0.415	120.122	42.2561	21395.3	1.5	1356127.13242242	0.4329	0.4329	0.865801	3.4632	0	0	0	2.1645	0	0	0	0.4329	0	0	1.7316	0	0	0	1.2987	1.7316	0	0	0	0	1.2987	0	0.4329	1.2987	1.2987	3.0303	0.4329	0	0	0	1.2987	0	3.4632	4.7619	1.2987	2.5974	0	1.2987	1.2987
66.62	1.085	122.689	42.2561	17470.4	1.5	1107344.5729	0.451467	0.225734	0.902935	2.7088	0.451467	0	0	2.0316	0.451467	0.225734	0	1.12867	1.3544	0.225734	0.225734	0	0.451467	0	1.58014	0.225734	0	0	0	0	1.58014	0	3.83747	1.58014	0.451467	3.386	0.225734	0.902935	0	1.3544	0.677201	0	0.225734	5.86907	3.386	0.451467	0	0.902935	0.902935
68.12	1.5	126.239	42.2561	11566.7	1.5	733148.033872465	0.826446	0.413223	1.03306	4.33884	0.826446	0	0	2.47934	0.206612	0	0	0.826446	0.619835	0.206612	0.619835	0	0	0.206612	0.413223	0.206612	0	0	0	0	1.44628	0	7.2314	0.619835	1.65289	10.3306	0.206612	0.413223	0.413223	4.95868	0.826446	0	1.44628	7.43802	7.2314	1.03306	0	1.03306	2.06612
69.62	1.5	129.789	42.2561	6210.94	1.5	393675.322875849	0.974026	0	1.2987	2.27273	3.24675	0	0	0	0	0.974026	0	0.974026	0.324675	0	1.62338	0.324675	0.649351	0	0.974026	0	0	0	0	0	1.94805	0	6.81818	2.92208	0	7.14286	0	0	0	0.974026	0.649351	0	0	4.87013	5.84416	0.649351	0.324675	0.649351	1.62338
69.92	0.3	130.499	42.2561	8888.89	1.5	563415.137141683	0	0	0.990099	5.94059	4.62046	0	0	2.31023	0	0	0	0	0	0	0.660066	0	0	0	0	0	0	0	0	0	0.330033	0	5.94059	0.990099	0	8.91089	0	0	0.330033	5.94059	0.990099	0	1.65017	3.63036	7.92079	0	0	0.660066	2.9703
71.42	1.5	134.049	42.2561	12382.8	1.5	784874.70032481	0	0	1.89274	12.3028	3.15457	0	0	3.47003	0	0	0	0.315457	0	0	0.630915	0	0	0	0.315457	0.315457	0.315457	0	0	0	0.630915	0	4.10095	0.630915	2.52366	13.8801	0	0	0	1.89274	0	0	0	1.57729	10.4101	0	0	0.315457	1.57729
72.92	1.5	137.599	42.2561	11158.2	1.5	707256.032676219	0	0	0	3.5503	1.18343	0	0	1.77515	0	0	0	1.18343	0	0	1.18343	0	2.95858	0	0	0.591716	0	0	0	0	0.887574	0	13.6095	0.591716	2.36686	7.69231	0	0	0	5.91716	0.591716	0	0.591716	2.95858	3.25444	0	0	0.887574	2.36686
74.42	1.5	141.148	42.2561	10744.8	1.5	681053.717677996	0	0.58651	0.58651	2.93255	2.93255	0	0	0.879765	0	0	0	0	0.293255	0	0.293255	0	0.879765	0	0	0	0	0	0	0	0.879765	0	36.0704	0.293255	0.879765	3.81232	0.293255	0	0.293255	2.34604	0	0	2.05279	1.17302	2.34604	0	0	0.58651	0.879765
75.92	1.5	144.698	42.2561	12554.7	1.5	795772.474722007	0.574713	0.287356	0	0.574713	4.02299	0	0	1.43678	0	0	0	0.287356	0	0	0.287356	0	0.287356	0	0.574713	0.287356	0	0	0	0	2.01149	0	11.4943	0.862069	0.862069	3.44828	0	0	0.287356	1.14943	0.287356	0	3.73563	1.43678	3.73563	0.862069	0	0	2.87356
77.3	1.38	147.964	42.2561	18433	1.5	1168360.35913452	0	0	3.13199	8.50112	5.14541	0	0	1.78971	0	0.447427	0	0.671141	0.447427	0	0.223714	0	0.447427	0	0	0.223714	0	0	0	0	0	0	25.5034	1.11857	3.3557	7.38255	0	0	0	1.11857	0.447427	0	1.34228	4.02685	2.23714	0	0	0.671141	1.11857
77.79	0.49	149.123	42.2561	12304.5	1.5	779912.62039519	0.697674	0	2.09302	6.27907	3.48837	0	0	2.32558	0	0	0	0	0	0	0.465116	0.232558	1.16279	0	0	0	0	0	0	0	0	0	17.907	0	1.16279	5.5814	0	0	0.232558	1.16279	0.465116	0	0	6.51163	3.25581	0	0	0.930233	0.930233
79.29	1.5	152.673	42.2561	14040.4	1.5	889939.818894243	0.245098	0	3.18627	10.049	5.39216	0	0	0	0	0	0	0.245098	0	0	1.71569	0	0	0	0	0	0	0	0	0	0	0	5.14706	1.22549	0.980392	9.55882	0	0	0	1.22549	0	0	0	8.82353	2.69608	0.245098	0	0	0.980392
80.79	1.5	156.321	41.1161	14423.7	1.5	889566.905011509	0	0	1.95228	2.81996	0.867679	0	0	0.650759	0	0	0	0.867679	0	0	0.433839	0	2.60304	0	0.650759	0	0	0	0	0	0	0	44.4685	0.650759	0.21692	3.03688	0	0	0	1.30152	0.867679	0	0	3.2538	3.2538	0	0	0	0.650759
82.29	1.5	159.168	52.6924	11850.4	1.5	936638.682576029	0	0	10.0917	3.89908	1.14679	0	0	2.06422	0	0	0	0.229358	0	0	1.14679	0	0.917431	0	0.688073	0	0	0	0	0	0	0	5.27523	0.688073	0	9.86239	0.688073	0	0	0.917431	0.229358	0	0	4.81651	3.21101	0.458716	0	0.458716	1.14679
83.79	1.5	162.015	52.6924	10807.5	1.5	854206.128951739	0.473934	0	1.18483	3.08057	1.89573	0	0	2.8436	0	0	0	0.473934	0	0	0	0	0	0	0	0.7109	0	0	0	0	0.947867	0	6.63507	1.18483	0	9.95261	0	0	0.473934	1.65877	0.7109	0	1.89573	13.0332	4.50237	0	0	0.7109	1.4218
85.24	1.45	164.767	52.6924	5244.57	1.5	414523.160996334	0	0.49505	0.247525	3.21782	2.47525	0	0	3.71287	0	0	0	0.49505	0	0	0.990099	0	0.49505	0	0	0.247525	0	0	0	0	0	0	3.21782	0.247525	0.247525	3.21782	0	0	0.742574	3.21782	0.247525	0	1.48515	6.18812	5.19802	0.742574	0	0.247525	1.23762
86.77	1.53	167.67	52.6924	11574.5	1.5	914829.904599029	0.246305	0	0.492611	4.18719	3.44828	0	0	2.95567	0	0.738916	0	0	0	0	0.985222	0	6.65025	0	0	0.492611	0	0.985222	0	0	1.23153	0	3.44828	1.97044	1.72414	7.38916	0.246305	0	0	3.20197	0	0	1.72414	6.15764	3.20197	0.985222	0	0.246305	2.21675
88.27	1.5	170.517	52.6924	18683.7	1.5	1476736.06158962	0	0.197239	2.16963	2.95858	3.94477	0	0	2.95858	0	0	0	0.788955	0	0	0.986193	0	3.94477	0	0	0	0	0	0	0	0	0	24.6548	0.197239	0.394477	2.76134	0	0	0	1.77515	0.394477	0	3.94477	4.53649	0.788955	0	0	0.788955	0
89.48	1.21	172.813	52.6924	14832.5	1.5	1172343.06484027	0.208333	0	1.875	2.70833	3.95833	0	0	3.125	0.208333	0.625	0	0.625	0.416667	0	0.833333	0	3.95833	0	0.416667	0	0	0	0	0	0	0	2.5	1.25	0.625	6.25	0	0	0	1.66667	0.416667	0	3.75	7.5	3.75	1.04167	0	0	2.91667
90.98	1.5	175.66	52.6924	16505.6	1.5	1304577.85159992	0.454545	0	0.681818	2.95455	2.72727	0	0	3.18182	0.227273	0.681818	0	2.04545	0	0	1.36364	0	5.22727	0	0.454545	0.227273	0	0	0	0	0.454545	0	2.27273	1.13636	0.909091	3.40909	0	0	0	2.5	0	0	2.72727	8.18182	4.54545	0.454545	0	0.454545	1.59091
92.49	1.51	178.526	52.6924	12006.1	1.5	948947.513868822	0	0	0	3.3419	0.771208	0	0	0.514139	0	0.771208	0	0	0.514139	0	0.514139	0	1.02828	0	0.514139	0	0	0	0	0	0	0	39.3316	0.771208	0.257069	8.74036	0.257069	0	0	0	0.514139	0	0.514139	5.39846	0.257069	0	0	0	0.514139
93.54	1.05	180.518	52.6924	11807.6	1.5	933258.582318245	0.2331	0	0	1.1655	0	0	0	3.9627	0	0	0	0.2331	0.699301	0	0.4662	0	1.3986	0	0	0.4662	0	0	0.2331	0	0.4662	0	3.9627	0.2331	0	4.662	0	0	0	1.8648	0.699301	0	0.932401	6.52681	1.3986	0.4662	0	0.2331	1.1655
94.41	0.87	182.17	52.6924	10295.5	1.5	813741.241986502	0.232558	0.232558	0.465116	2.32558	0.465116	0	0	1.86047	0	0	0	0	0.465116	0	1.16279	0.232558	2.32558	0	0	0.930233	0	0	0	0	0.465116	0	1.39535	0	0	9.76744	0	0	0	0	0	0	1.62791	8.83721	2.7907	1.62791	0	0	0.697674
95.92	1.51	185.035	52.6924	12713.3	1.5	1004844.78490511	0	0	0	2.26757	2.04082	0	0	3.62812	0	0.226757	0	0.907029	0.453515	0	1.13379	0	0.680272	0	0	1.36054	0	0	0	0	0.453515	0	2.04082	0.226757	0.680272	8.61678	0.226757	0	0	2.04082	0.907029	0	0.453515	13.3787	2.04082	0.453515	0.453515	0.226757	2.49433
97.42	1.5	187.882	52.6924	7865.17	1.5	621652.01299794	0.2457	0	0.4914	5.40541	4.4226	0	0	1.7199	0	0.982801	0	0.2457	0.2457	0	0.982801	0	4.914	0	0	0.2457	0	0.4914	0	0	0.737101	0	1.2285	0	0	4.6683	0.2457	0	0	0.982801	0	0	0.4914	12.7764	2.457	0	0.2457	0.2457	1.2285
98.92	1.5	190.729	52.6924	7688.44	1.5	607683.809116507	0.197628	0.395257	0	2.56917	1.18577	0	0	3.35968	0.395257	0.592885	0	0.197628	0.790514	0	1.58103	0.197628	1.77866	0	0.592885	1.18577	0	0	0	0	0.790514	0	0.197628	0.197628	0.395257	6.52174	0	0	0.395257	1.3834	0	0	0.592885	4.74308	2.37154	0.790514	0	0.988142	0.592885
101.44	2.52	195.682	50.8756	22770.8	1.5	1737714.60349538	0.442478	0.221239	0.663717	1.32743	1.32743	0	0	1.99115	0.221239	1.10619	0	0.221239	1.32743	0	0.221239	0.221239	1.99115	0	0	0.442478	0	0	0	0	0.884956	0	8.62832	0.221239	0.884956	6.19469	0.442478	0	0.221239	2.43363	0	0	1.54867	2.43363	2.43363	1.32743	0	0.663717	0.663717
102.94	1.5	199.203	42.603	27516.8	1.5	1758446.68880127	0.162866	0.488599	0	2.9316	2.9316	0	0	1.9544	0.651466	0.162866	0	0.814332	0	0	1.4658	0	0.325733	0	0.814332	1.62866	0	0.162866	0	0	1.30293	0	2.9316	2.76873	0.325733	2.443	0	0	0	1.30293	0.162866	0	2.28013	4.72313	2.443	0.325733	0	0.651466	1.30293
104.44	1.5	202.724	42.603	30595.2	1.5	1955174.18856756	0	0	0	2.47148	2.6616	0	0	1.52091	0.190114	0	0	0.570342	0.190114	0	2.28137	0.190114	1.90114	0	0.190114	0.190114	0	0	0	0	2.28137	0	4.75285	0.760456	0.190114	6.27376	0	0	0	0	0	0	1.71103	2.09125	0.380228	0.95057	0	0.95057	0.95057
105.94	1.5	206.245	42.603	24393.3	1.5	1558842.62186039	0.352113	0	1.23239	2.64085	0.528169	0	0	1.76056	0.704225	0	0	0.528169	0.880282	0	1.05634	0	0.352113	0	0.352113	0	0	0	0	0	0.176056	0	6.8662	1.76056	1.05634	7.92254	0.352113	0	0.176056	0.528169	0	0	0	1.93662	0.704225	0.704225	0.176056	1.23239	0.176056
108.12	2.18	211.362	42.603	861.111	1.5	55028.8973954814	0	0	0	1.0929	1.0929	0	0	0	0.546448	1.0929	0	0	0	0	0	0	1.63934	0	0	0	0	0	0	0	0	0	0	0.546448	1.63934	4.37158	0	0	0	0	0	0	0	0	0.546448	0	0	0	0.546448
109.62	1.5	214.882	42.603	25403.4	1.5	1623390.77325264	0.147493	0	0.147493	3.24484	1.03245	0	0.147493	1.9174	1.03245	0	0	0.737463	0	0	0.884956	0.589971	0.294985	0	0	1.47493	0	0	0	0	1.47493	0	0.737463	2.21239	0.147493	5.30973	0	0	0	0.737463	0.737463	0	1.62242	3.9823	3.53982	0.294985	0.147493	0.884956	1.47493
111.12	1.5	218.403	42.603	13567.3	1.5	867008.773905037	0.455581	0	0.22779	0.683371	0.911162	0	0	1.36674	2.05011	0.683371	0	0.911162	0	0	0.683371	0.22779	1.36674	0	0.683371	0	0	0.455581	0	0	1.36674	0	6.37813	1.59453	0.22779	6.37813	0	0	0	2.05011	0.683371	0	2.2779	5.01139	3.87244	0.22779	0	0.22779	0.22779
112.61	1.49	221.901	42.603	10734.6	1.5	685991.613515469	0.220264	0	0.220264	0.881057	0.660793	0	0.220264	2.20264	0	0.881057	0	0	0	0	1.54185	0	4.18502	0	1.76211	0	0	0	0.220264	0	0.881057	0	2.20264	0.660793	0	4.40529	0.660793	0	0	0.220264	0.660793	0	1.76211	4.84581	3.0837	0.660793	0.660793	0.881057	1.32159
115.57	2.96	228.849	42.603	13021.4	1.5	832129.110587022	0.465116	0	0.697674	0.465116	0.465116	0	0	2.09302	0	0.465116	0	0.465116	0.465116	0	2.32558	0	1.16279	0	0.465116	0	0	0.465116	0	0	3.25581	0	13.2558	0.465116	0.930233	5.5814	0	0	0	0	0.232558	0	3.02326	3.48837	2.55814	0.232558	0.465116	0.465116	0.232558
117.07	1.5	232.369	42.603	19669	1.5	1256940.08601346	0.243309	0	2.18978	1.21655	0.973236	0	0.243309	1.94647	0	1.21655	0	0.486618	0.973236	0	1.21655	0	1.94647	0	0	0.243309	0	0	0	0	1.70316	0	0.243309	0.729927	0.486618	7.78589	0	0	0	1.21655	0.729927	0	3.64964	3.16302	3.16302	0.243309	0	1.21655	0
118.58	1.51	235.914	42.603	25098	1.5	1603878.29979999	0	0.315956	0.789889	2.05371	1.26382	0	0.157978	0.947867	0.315956	0.473934	0	1.26382	0.631912	0	1.4218	0.473934	1.57978	0	0	0.157978	0	0	0.315956	0	1.4218	0	0.473934	1.26382	0	4.58136	0.631912	0	0.157978	0.473934	0	0	1.57978	3.47551	4.42338	0.315956	0	1.57978	0.315956
119.61	1.03	238.332	42.603	11072.7	1.5	707593.36755882	0	0.263852	1.05541	2.63852	3.69393	0	0	0.263852	0	0.791557	0	0.527704	0.791557	0	0.263852	0	3.69393	0	0.527704	0.791557	0	0	0	0	0	0	0.263852	0.263852	0.527704	3.43008	0	0	0	0	0.527704	0	0.527704	3.95778	1.58311	0.527704	0	0.791557	0.263852
120.455	0.845	239.994	50.8197	5660.38	1.5	431487.860829417	0.796813	0.398406	3.18725	1.99203	0.796813	0	0	2.39044	0	0	0	0	0	0	2.39044	0	1.19522	0	0	0	0	0	0.796813	0	3.18725	0	4.38247	0.796813	0	7.17131	0	0	0	0	1.59363	0	4.38247	5.57769	3.18725	0.796813	0	0.398406	0.796813
121.07	0.615	241.023	59.8042	85.4701	1.5	7667.20562286363	#DIV/0!	#DIV/0!	#DIV/0!	#DIV/0!	#DIV/0!	#DIV/0!	#DIV/0!	#DIV/0!	#DIV/0!	#DIV/0!	#DIV/0!	#DIV/0!	#DIV/0!	#DIV/0!	#DIV/0!	#DIV/0!	#DIV/0!	#DIV/0!	#DIV/0!	#DIV/0!	#DIV/0!	#DIV/0!	#DIV/0!	#DIV/0!	#DIV/0!	#DIV/0!		#DIV/0!	#DIV/0!	#DIV/0!	#DIV/0!	#DIV/0!	#DIV/0!	#DIV/0!	#DIV/0!	#DIV/0!	#DIV/0!	#DIV/0!	#DIV/0!	#DIV/0!	#DIV/0!	#DIV/0!	#DIV/0!
127.53	6.46	251.825	59.8042	8103.13	1.5	726901.925349936	0.249377	0	4.2394	0	1.24688	0	0	0.249377	0	0	0	0.498753	0	0	1.74564	0	0.249377	0	0.249377	0	0	0	0	0	2.49377	0	9.47631	1.49626	0.997506	0.249377	0	0	0	0.498753	0	0	0.997506	8.72818	8.22943	0.498753	0	0	3.2419
129.03	1.5	254.333	59.8042	6994.11	1.5	627415.419653267	0.332226	0.332226	0	2.65781	3.32226	2.32558	0	0.996678	0	1.3289	0.332226	0	0.996678	0	0	0	2.32558	0.332226	0	0.332226	0	0	0	0	0.332226	0.996678	1.99336	0.664452	2.32558	0.996678	0.332226	0.664452	0	1.66113	0.664452	0	1.99336	6.97674	2.32558	0.996678	0	0.332226	0.996678
131.41	2.38	258.312	59.8042	7127.88	1.5	639416.016095411	0	0	0.578035	4.33526	2.31214	2.02312	0	2.02312	0	0	0.867052	0	0	0	0.867052	0	2.89017	0	0	0	0	0	0	0	0.289017	0	2.89017	0.289017	0.578035	2.02312	0	0	0	2.31214	0.867052	0	2.31214	9.82659	7.22543	0	0	0.289017	1.44509
132.91	1.5	260.821	59.8042	9393.26	1.5	842634.512790483	0	0	1.26263	1.0101	1.76768	0.252525	0	1.26263	0.252525	0	0	0.757576	0.505051	0	0.505051	0	2.52525	0	0	0.252525	0	0	0	0	0	0.505051	1.26263	1.76768	0.505051	3.78788	0	0	0	1.51515	1.0101	0	6.31313	13.1313	2.27273	0	0.505051	0	1.51515
134.41	1.5	263.329	59.8042	12469.4	1.5	1118587.18708134	0.265957	0	0.531915	1.32979	0.265957	0	0.265957	1.06383	0	0.265957	0	0	0.265957	0	1.06383	0	1.8617	0	0	0.265957	0	0	0.265957	0.265957	1.06383	0	17.2872	0	0	5.31915	0	0	0	1.06383	0	0	4.78723	7.18085	1.59574	0.265957	0	0.265957	0.265957
135.91	1.5	265.837	59.8042	11798.2	1.5	1058377.02880871	0	0	1.46699	4.15648	2.20049	0	0	0.977995	0	0.488998	0	0	0.733496	0	1.22249	0	2.44499	0	0	0.244499	0	0	0	0	0.977995	0	2.93399	0.244499	0.244499	1.46699	0.244499	0.977995	0	4.40098	0.244499	0	11.0024	13.4474	3.42298	0.244499	0	0	1.46699
138.91	3	270.853	59.8042	9496.72	1.5	851915.46415266	0.238095	0	0.238095	4.28571	0.952381	0	0.238095	0.238095	0	0.47619	0	0.47619	0.238095	0	1.42857	0	4.7619	0	0	0.238095	0	0	0	0	1.19048	0	13.3333	0.47619	0.238095	3.57143	0.238095	0.47619	0	2.38095	0	0	1.66667	4.04762	4.04762	0.714286	0	0	1.42857
141.43	2.52	275.809	50.8526	5582.52	1.5	425829.220474722	0.536193	0	1.34048	4.02145	1.07239	0	0	4.02145	0	0	0	0.80429	0.268097	0	1.60858	0.536193	1.60858	0	0.268097	0	0	0	0.268097	0	0	0	1.60858	0.80429	0	6.43432	0	0	0	0.268097	0.536193	0	1.34048	2.68097	0.80429	1.60858	0	0.268097	1.34048
145.93	4.5	288.242	36.1936	14125	1.5	766851.052347546	0.7109	0.473934	0	1.18483	0.7109	0	0	1.4218	0	0.7109	0	0.947867	0.473934	0	0.473934	0.236967	0.7109	0	1.18483	0.236967	0	0.473934	0	0	0.7109	0.473934	0.947867	0.947867	1.18483	4.2654	0	0	0.7109	2.36967	0	0	0	1.89573	3.31754	1.4218	0	0.7109	0.947867
146.7	0.77	290.369	36.1936	20545.5	1.5	1115419.71250551	0	0.221239	0.663717	4.20354	1.32743	0	0	1.76991	0.221239	0.221239	0	0	2.21239	0.221239	0.663717	0.221239	1.10619	0	0.884956	0.221239	0	0	0	0	0.884956	0	0.663717	0	0	3.76106	0.221239	0.442478	0.221239	1.99115	0	0	1.54867	3.76106	5.53097	0.442478	0	1.32743	0.663717
148.2	1.5	294.514	36.1936	16930.9	1.5	919186.830507798	0.230947	0	0.461894	1.38568	0.461894	0	0	1.38568	0	0.923788	0	0	0.461894	0	0.692841	0	2.30947	0	0.230947	0.692841	0	0.461894	0	0	0.692841	0	6.92841	0.692841	0	2.54042	0	0.692841	0	1.61663	0	0	0.692841	2.30947	2.30947	0.461894	0	0.230947	0
150.44	2.24	300.703	36.1936	10769.2	1.5	584665.199883763	0.25641	0	0.25641	0.25641	2.05128	0	0.25641	0.769231	0.25641	1.28205	0.25641	0	0.512821	0	1.28205	0	3.33333	0	0	1.02564	0	0.512821	0	0	0.769231	0	10.5128	0.512821	0	4.10256	0	0.512821	0	1.02564	0.25641	0	0	1.53846	2.5641	0.512821	0	1.02564	0
151.23	0.79	302.885	36.1936	7778.78	1.5	422312.446858489	0.453515	0.226757	0	2.72109	0.680272	0	0	1.13379	0	0	0	0.226757	0	0	0.453515	0	6.80272	0	0.453515	0.453515	0	0	0	0	0	0	0.907029	0	1.81406	1.13379	0	0	0	0.680272	0.226757	0	0.680272	4.30839	1.36054	1.36054	0	0.226757	0
151.95	0.72	304.875	36.1936	17112.3	1.5	929032.555965036	0.497512	0.248756	0.497512	4.22886	1.99005	0	0	1.24378	0	0	0	0.497512	0.248756	0	0.248756	0	6.46766	0	0	1.49254	0	1.24378	0	0	0.248756	0.248756	2.23881	0.746269	0.248756	2.48756	0	0.248756	0.497512	0	0.497512	0	0.995025	3.73134	1.24378	0.746269	0	0.995025	0.995025
153.45	1.5	309.019	36.1936	12912.1	1.5	701001.64271778	0.507614	0.253807	0	2.53807	0.507614	0	0	1.26904	0	0.507614	0	0	0.761421	0	1.26904	0	2.28426	0	0.507614	0.253807	0	0.253807	0	0	0.253807	0	11.9289	0.507614	0	2.53807	0.507614	0.507614	0.507614	0	0.253807	0	0.761421	3.5533	5.07614	2.03046	0	0	0
156.45	3	317.308	36.1936	14307.3	1.5	776748.441155402	0	0.25974	0.519481	2.85714	0.779221	0	0	1.03896	0.25974	0	0	1.03896	0.519481	0	1.2987	1.55844	4.41558	0	0	1.03896	0	1.03896	0	0	1.03896	0	6.23377	1.81818	0	3.63636	0	0	0	0	0.25974	0	0.25974	3.8961	2.07792	0.25974	0	0.519481	0
157.18	0.73	319.325	36.1936	10883.7	1.5	590880.909649979	0	0	0.810811	1.62162	1.62162	0	0	2.16216	0	0	0	0.27027	0.27027	0	1.08108	0.27027	0	0	0.27027	0	0	0.27027	0	0	1.89189	0	20.5405	1.08108	0	1.08108	0	0	0.810811	0.27027	0.27027	0	0	1.08108	2.43243	0.27027	0	0.27027	0
158.69	1.51	323.497	36.1936	13772.7	1.5	747726.046214985	0.245098	0	1.22549	0.735294	0	0	1.47059	2.69608	0.245098	0.245098	0	0.735294	0.245098	0	0.490196	0.245098	2.45098	0	0	0	0	0	0	0	1.47059	0	1.47059	1.22549	0.735294	2.20588	0	0	0	0	0.245098	0	0.735294	3.18627	3.18627	0.490196	0	0.980392	0
159.115	0.425	324.671	36.1936	7770.27	1.5	421850.614781004	0	0	0	1.61943	0	0	0	1.21457	0	0	0	0	0	0	0.809717	0	0	0	0	0	0	0	0	0	0	0	0	4.04858	0	2.02429	0	0	0	0	0	0	1.21457	3.64372	1.61943	0.404858	0	0	0
160.35	1.235	328.083	36.1936	43.8596	1.5	2381.15526268452	#DIV/0!	#DIV/0!	#DIV/0!	#DIV/0!	#DIV/0!	#DIV/0!	#DIV/0!	#DIV/0!	#DIV/0!	#DIV/0!	#DIV/0!	#DIV/0!	#DIV/0!	#DIV/0!	#DIV/0!	#DIV/0!	#DIV/0!	#DIV/0!	#DIV/0!	#DIV/0!	#DIV/0!	#DIV/0!	#DIV/0!	#DIV/0!	#DIV/0!	#DIV/0!		#DIV/0!	#DIV/0!	#DIV/0!	#DIV/0!	#DIV/0!	#DIV/0!	#DIV/0!	#DIV/0!	#DIV/0!	#DIV/0!	#DIV/0!	#DIV/0!	#DIV/0!	#DIV/0!	#DIV/0!	#DIV/0!
161.77	1.42	332.007	36.1936	14102.6	1.5	765632.999847765	0.791557	0	1.05541	2.90237	0.527704	0	0	1.84697	0.527704	0.527704	0	0.263852	0	0	0.527704	0	0.263852	0	0.263852	0.791557	0	0	0	0	1.31926	0.263852	1.84697	2.11082	0.791557	1.58311	0	0	0	1.31926	0.791557	0	0	8.70712	5.5409	0.527704	0	1.05541	0.263852
162.575	0.805	334.231	36.1936	7224.33	1.5	392211.581671071	0	0	1.59363	4.38247	1.19522	0	0	12.3506	0	0	0	1.19522	0	0	0.796813	0	0.796813	0	0.398406	0	0	0	0	0	0.796813	0	2.78884	0.796813	0	4.38247	0	0	0	0	0	0	5.17928	6.77291	7.96813	0	0	0	0
163.27	0.695	336.151	36.1936	11736.8	1.5	637197.148294365	0.606061	0	0.606061	1.51515	0.30303	0	0	6.9697	0.30303	0.30303	0	1.51515	0	0	2.42424	0	6.06061	0	0.30303	0	0	0	0	0	1.51515	0	21.5152	0.909091	0	2.42424	0	0	0	2.42424	0.909091	0	2.42424	3.63636	7.87879	0	0	0	0
164.77	1.5	340.295	36.1936	9925.65	1.5	538866.943387294	0	0	0.797872	3.7234	0	0	0	3.19149	0	0	0	0	0	0	0.265957	0	0	0	0	0.797872	0	0	0	0	1.8617	0	31.6489	0.265957	0	1.06383	0.265957	0	0	3.19149	0.265957	0	0.797872	5.05319	7.97872	0	0	0.531915	0
165.185	0.415	341.442	36.1936	2652.33	1.5	143995.883842339	0	1.19048	1.98413	3.1746	0	0	0	3.96825	0	0.396825	0	0	0	0	0.793651	0	0.396825	0	0.793651	0	0	0.793651	0	0	0	0	17.0635	0	0	3.1746	0	0	0	0	0	0	5.15873	7.14286	8.33333	0	0	0	0
166.27	1.085	344.44	36.1936	5688.07	1.5	308807.438470719	0	0	0.611621	1.52905	0.30581	0.30581	0.30581	1.22324	0.30581	0	0	0.917431	0	0	1.22324	0.30581	1.83486	0	0	0	0	0	0	0	0.611621	0	1.52905	0.917431	0.611621	5.19878	0	0	0	0.611621	0.30581	0	0.917431	14.0673	14.0673	0.917431	0.30581	0.30581	0
167.77	1.5	348.584	36.1936	7054.41	1.5	382986.263338495	0	0.475059	0.712589	1.90024	0.23753	0	0	0.712589	0	1.42518	0	0.950119	0	0.23753	2.13777	0.23753	3.80048	0	0.23753	0	0	0	0	0	0	0	15.677	0.950119	1.66271	1.90024	0	0	0	0	2.3753	0	0.475059	2.85036	7.12589	0	0	0.475059	0.475059
170.72	2.95	356.735	36.1936	7306.79	1.5	396688.198515984	0	0.52356	0.78534	2.09424	0	0	0.26178	6.02094	0	0.52356	0	0.26178	0	0	1.57068	0	7.06806	0	0	0.78534	0	0	0	0	0.52356	0	28.2723	0.52356	0.26178	1.3089	0	0	0	0	1.04712	0	0.26178	2.09424	5.2356	0.52356	0	0	0.78534
171.51	0.79	358.917	36.1936	5369.46	1.5	291509.70733121	0	0.210084	0.630252	3.15126	0.630252	0	0	2.31092	0.210084	0	0	1.05042	0	0	1.47059	0	3.9916	0	0	0.630252	0	0	0.210084	0	0.630252	0	8.61345	0.420168	1.2605	0	0.210084	0	0	2.94118	1.05042	0	0.210084	3.36134	11.3445	0.840336	0	0.840336	0.210084
173.01	1.5	363.062	36.1936	5986.08	1.5	324986.257940032	0.241546	0	0	1.44928	0.483092	0	0	3.86473	0.241546	0.724638	0.241546	0.241546	0	0.241546	1.20773	0.241546	0.724638	0	0.483092	0.483092	0	0	0.483092	0	0.966184	0	0.966184	0.724638	0.966184	1.44928	0.241546	0	0	0.724638	2.17391	0.241546	0.483092	4.10628	5.55556	1.20773	0.483092	0.724638	0
174.49	1.48	367.151	36.1936	5109.17	1.5	277378.592957956	0	0	0.28169	0.84507	0	0	0	3.09859	0.28169	0.56338	0.28169	0.56338	0	0.56338	0.56338	0	3.09859	0	0	0.84507	0	0	0	0	0.56338	0	0.56338	0.56338	1.12676	6.19718	0	0	0	0	0	0	1.69014	5.35211	3.94366	1.69014	0	0.28169	0.28169
175.14	0.65	368.947	36.1936	7037.04	1.5	382043.133257376	0.25974	0	0	2.07792	0	0	0	3.11688	0	1.03896	0	0.519481	0.25974	0	0	0	6.23377	0	0	1.03896	0	0	0	0	0.25974	0.25974	0.779221	0.519481	1.2987	1.2987	0	0	0.779221	0	0.25974	0	0	4.15584	1.81818	1.03896	0	2.33766	0.519481
176.64	1.5	373.091	36.1936	5666.67	1.5	307645.259938839	0	0	0	1.9656	0.2457	0	0	1.9656	0	0.982801	0.2457	0.737101	0.737101	0	0.2457	0	5.15971	0	0	1.2285	0	0	0	0	0.737101	0	6.38821	1.2285	0.982801	3.6855	0	0	0	0.2457	0.2457	0	0.4914	5.89681	3.4398	1.4742	0	0.4914	0.4914
178.14	1.5	377.236	36.1936	7161.8	1.5	388816.758543391	0.391389	0.195695	0.391389	0.978474	0.391389	0	0	2.15264	0.391389	0.978474	0	0.587084	0	0.195695	0.391389	0	1.76125	0	0.195695	0.195695	0	0	0	0	1.95695	0	0.978474	0.978474	0.587084	3.7182	0.195695	0	0.195695	0	0	0	0	5.67515	4.10959	0	0	1.36986	0
180.02	1.88	382.43	36.1936	10169.5	1.5	552105.15243261	0.27027	0	0	1.89189	0	0	0	1.62162	0	1.08108	0	0.540541	0	0	1.08108	0	2.7027	0	0	0.27027	0	0.27027	0.27027	0	0.810811	0	2.97297	0.540541	0	2.7027	0	0	0	0.540541	0	0	0.810811	2.97297	0	0	0	0.810811	0
181.52	1.5	386.574	36.1936	5111.11	1.5	277483.959944835	0.253165	0	0	0.253165	0.253165	0	0	1.01266	0	2.27848	0.253165	0.506329	0	0	0.253165	0	3.03797	0	0.253165	0	0	0	0	0	0.253165	0	4.81013	0.759494	0	1.77215	0	0	0	0	0	0	0	1.01266	1.51899	0.506329	0	0.759494	0
	1.52209						#DIV/0!																										17.5971
[truncated: 105 more columns]

## Sheet: (%>1)
Age (ka)	Rads Absolute abundances (skel/g)	Acanthodesmia vinculata	Anthocyrtidium zanguebaricum/ophirense	Archipera triclavigera	Arachnocoralium calvata	Arachnocorys castanerides	Amphimelissa setosa	Botryostrobus aquilonaris	Botryostrobus auritus/australis gr.	Botryopyle scatum	Carpocanarium papillosum	Cornutella profunda	Corocalyptra cervus	Cycladophora bicornis	Cycladophora cornuta	Cycladophora davisiana	Eucecryphalus sp.	Eucyrtidium acuminatum	Eucyrtidium anomalus	Eucyrtidium sp.	Lamprocyclas maritalis	Lampromitra erosa	Lithomelissa setosa	Lophophaena hispida	Lophophaena thoracites	Lophophaena spp.	Lophospylis pentagona	Phormacantha hystrix	Phormospyris stabilis	Phormospyris stabilis capoi	Plectacantha oikiskos	Pseudocubus obeliscus	Pseudodictyophimus gracilipes	Pterocanium praetextum	Pterocanium trilobum	Pterocorys claudas	Stichocorys seriata	Zygocircus productus	Verticillata hexacantha	Other Nassellaria	Acanthosphaera circospora	Acrosphaera lappacea/spinosa	Actinomma boreale	Actinomma leptodermum	Actinomma medianum	Actinomma popofskii	Anomalacantha dentata	Cenosphaera reticulata	Dictyocoryne profunda
0.789403	37768.9	0.998573	0.570613	1.71184	3.85164	3.13837	0	0	0.85592	0.713267	0.570613	0.42796	0	0.85592	0.285307	0	1.14123	0.998573	0.42796	0	0	2.99572	2.71041	3.70899	1.85449	3.42368	0	0	0.42796	0.142653	1.71184	3.99429	2.71041	0.285307	0.285307	1.28388	0.85592	2.1398	1.28388	2.99572	0	0	0.42796	2.99572	0.142653	0	0.285307	0	0.142653
1.51741	20234.4	0	0	4.77941	5.14706	4.04412	0	0	1.47059	0	1.10294	1.10294	0	0	0	0.367647	0.735294	0.735294	0.735294	0	1.10294	0	0	0.735294	2.20588	2.57353	0	0	1.10294	0.367647	0.367647	1.47059	1.47059	0	0	0.735294	0.367647	1.10294	0	8.08824	0	0.735294	0.367647	1.47059	0	0	0	0	0
3.42074	21111.1	0.566038	0.188679	2.07547	5.09434	3.96226	0	0	1.50943	0.566038	0.188679	0.377358	0.377358	1.50943	0	0.188679	0.566038	0.566038	1.13208	0	0	2.64151	2.45283	2.83019	2.07547	3.39623	1.13208	0	0.754717	0	1.69811	4.90566	3.39623	0.566038	0	1.50943	1.69811	2.64151	2.26415	3.39623	0.188679	0	0	1.13208	0	0	0.566038	0	0.566038
6.05209	29058.1	0.691563	0.691563	1.38313	4.56432	3.45781	0	0	0.829876	0.968188	0.276625	0.829876	0.55325	1.93638	0	0	0.138313	0.968188	0.414938	0	0.276625	2.62794	1.1065	3.18119	2.07469	4.01107	0.414938	0	0.691563	0	2.90456	5.94744	1.52144	1.38313	0	1.38313	1.93638	3.3195	1.93638	3.59613	0.55325	0.138313	1.24481	3.04288	0	0	0.138313	0	0
6.78009	21621.6	0.70922	0	3.90071	5.67376	1.06383	0	0	1.77305	1.41844	0	0.35461	0	0.35461	0	0.70922	0	1.77305	0	0	0	1.06383	0.70922	2.12766	1.41844	4.60993	0	0	0.70922	6.38298	0.35461	0	0	1.41844	0	0	0	2.12766	0	10.2837	0	0	1.06383	2.48227	0	0	0	0	0.35461
7.48178	18059.1	1.21581	1.21581	0.911854	6.68693	0.911854	0	0	4.25532	0.303951	0	0.303951	0	2.12766	0	0	0	0	1.51976	0.303951	0.303951	1.82371	0.911854	1.51976	0.911854	7.29483	0	0.911854	1.21581	0	2.12766	4.25532	2.12766	0.911854	0	0.911854	0.607903	0.607903	0	8.81459	0	0	1.21581	1.82371	0	0	0	0	0
8.73606	23193.6	0.17301	0.519031	2.76817	6.05536	4.84429	0	0	1.38408	0.17301	0.519031	0.692042	0.346021	1.55709	0.17301	0.692042	1.21107	0	0.17301	0.346021	0	2.94118	3.63322	0.865052	0.865052	4.84429	0.519031	0	0.346021	0	3.2872	12.9758	5.70934	0.17301	0	1.21107	1.55709	1.38408	2.24913	5.19031	0	0.17301	0.692042	2.42215	0	0.346021	0.346021	0	0.17301
10.1658	4494.38	0.381679	0.381679	1.9084	3.43511	6.48855	0	0	3.81679	0.381679	0	1.52672	0	2.67176	0	0.763359	1.52672	0.381679	0	0	0	2.29008	2.29008	0.381679	1.52672	5.34351	0	1.52672	0	0	5.34351	6.48855	5.34351	0.381679	0	1.9084	0	0.381679	0	7.25191	0	0.381679	0.381679	1.9084	0	0	0	0	0
11.3674	15838.2	0.661157	0.165289	2.14876	4.46281	6.28099	0	0.495868	2.97521	0	0.330579	0.495868	0.991736	0.991736	0.330579	0.330579	0.495868	0.991736	0	0.330579	0.165289	3.47107	1.98347	0.495868	3.96694	4.29752	0.330579	0	0.661157	0	2.97521	5.78512	5.45455	0.330579	0.165289	0.826446	1.4876	1.81818	0.495868	3.63636	0	0.165289	2.31405	1.98347	0.165289	0.330579	0	0	0
13.9987	9027.52	0.217865	0.43573	7.40741	4.13943	6.97168	0	0	0	0	0	0.43573	0.87146	0.87146	0.217865	0	0.217865	0.653595	0	0.653595	0	2.39651	29.4118	0.217865	3.48584	3.05011	0	0	0	0	0.653595	9.58606	3.26797	0.43573	0.217865	0.43573	0.87146	1.08932	0.43573	2.83224	0	0	0.217865	0.653595	0	0.217865	0.217865	0	0
14.7267	9784.95	0	0.8	0	2.4	4	0	0.4	4	0	0	0.4	0	1.2	0	0	1.2	0	0	0	0	0	37.2	0.8	1.6	2.4	0	0	0.4	0	2.8	0.8	4	0.4	0	0	0	0	0	7.2	0	0.8	0.8	0.8	0	0	0	0	0
17.823	14285.7	0.421941	0	2.1097	2.95359	9.49367	0	0	1.68776	0	0	0	0.632911	1.47679	0	0.632911	0.421941	0	0	0.21097	0	1.47679	44.3038	0.421941	0.843882	2.95359	0	0	0	0	0.632911	4.85232	1.68776	0	0	0.843882	0.632911	0	0.421941	2.1097	0	0	0.632911	1.05485	0	0	0.843882	0	0
20.4543	8610.57	0.191205	0	0.573614	3.25048	3.25048	0	0	0.382409	0	0.573614	0.764818	0	0.764818	0	1.72084	0	1.33843	0	0.382409	0.382409	2.29446	39.1969	0.764818	4.78011	1.14723	0	0	0	0	0.956023	3.44168	3.63289	0.764818	0	1.14723	0.956023	0.382409	0	1.72084	0	0.191205	0	1.52964	0.191205	0	1.14723	0	0.956023
23.0856	9312.38	0	0	0.88968	5.16014	3.20285	0	0	0	0.177936	0.711744	0.533808	0.355872	1.42349	0.177936	1.06762	0	0.533808	0.177936	0.711744	0	1.60142	15.3025	0.533808	5.33808	2.84698	1.24555	0	0	0	1.77936	6.76157	6.76157	0.88968	0	0.711744	1.42349	0.88968	0.533808	3.02491	0	0	1.77936	1.77936	0	0	0	0	0
25.717	16392.2	0	0	0.540541	5.94595	0	0	0	0	0	0.810811	0.540541	0	0.27027	0	0.810811	0.27027	0.540541	0	0.27027	0	0.810811	28.6486	0	0.810811	4.59459	0	0.810811	1.62162	0	0	5.67568	4.59459	0	0.810811	0.540541	1.62162	0.27027	0.540541	3.51351	0	0.27027	4.05405	3.24324	0.540541	0	0.27027	0	0
28.7167	18003.8	0.419287	0	1.46751	5.24109	0	0	0	0	0	0	0.838574	0	2.30608	0	0.209644	0	0.628931	0	0.419287	0	1.67715	23.4801	1.04822	1.25786	5.66038	0	0.628931	0.419287	0	0	4.8218	4.8218	0.838574	0	0.838574	1.04822	0.419287	0	2.30608	0.419287	0.419287	3.3543	5.24109	0.209644	0	0.209644	0	0
31.3481	4392.16	0.623053	0	0.934579	4.04984	1.86916	0	0	0	0.623053	0	0.623053	0	2.49221	0	0.934579	0.623053	0.623053	0	0	0	1.24611	11.215	0	0	4.6729	0	0	1.55763	0	0	2.49221	0.934579	0.311526	0	1.24611	2.49221	0.934579	0	4.6729	0	0.623053	1.24611	4.04984	0.623053	0	0.623053	0	1.24611
32.1375	12446.2	0	0	1.00334	1.00334	0.334448	0	0	1.17057	0.167224	0.334448	0.668896	0.501672	2.00669	0	0.334448	0	0.668896	0	0	0.167224	1.67224	28.5953	0.334448	0	2.34114	0	0.668896	1.17057	0	0	6.35452	0.83612	0	1.00334	0.334448	1.00334	2.00669	0.668896	3.51171	0.167224	0.501672	0.167224	4.01338	0	0.167224	0.167224	0.167224	0
34.7688	10358.6	0	0.207469	0.414938	2.07469	1.65975	0	0.207469	0	0.207469	1.24481	1.45228	1.24481	0.207469	0	0.622407	0.207469	0.622407	0	0.414938	0.622407	1.65975	5.80913	0.207469	2.28216	4.77178	0.414938	3.11203	0.829876	0	0	5.18672	4.97925	1.24481	0	1.03734	3.3195	2.28216	0	3.11203	0.414938	0	3.52697	6.0166	0.207469	0	0.622407	0	0
37.2894	17176.9	0	0.688073	1.83486	2.06422	1.6055	0	0.458716	0	0	0	0.688073	0.229358	1.37615	0	0.229358	0.229358	0.229358	0	0.917431	0	1.14679	30.7339	0.688073	0.917431	2.06422	0.458716	2.52294	1.37615	0	0	2.98165	3.89908	0.688073	0	1.37615	0.688073	2.52294	0	3.66972	0	0.229358	1.83486	1.37615	0	0.229358	0.229358	0	0
39.7511	12697.2	0.199601	0	0.199601	1.39721	0.199601	0	0.399202	0.798403	0.199601	0	0.399202	0	0.998004	0.199601	0.399202	0	0.998004	0	0.399202	0	2.59481	32.7345	1.79641	2.39521	1.59681	1.59681	2.59481	0.399202	0	0	5.38922	4.79042	0.199601	0	0.798403	1.79641	0.598802	0.199601	1.79641	0.199601	0	1.99601	2.59481	0.399202	0.199601	0.399202	0	0
42.2129	15039.1	0	0	1.0352	4.34783	1.0352	0	0.414079	1.0352	0	0.621118	0	0	1.24224	0	0.207039	0.414079	0.621118	0	0.207039	0	1.65631	43.6853	0.414079	0	2.27743	0	0	0.414079	0	0	4.34783	2.48447	0.828157	0	0.414079	1.65631	1.0352	0	1.65631	0	0.207039	0.207039	1.0352	0.414079	0	0.828157	0.414079	0
44.6911	22857.1	0	0.341297	0.341297	2.73038	1.19454	0	0.170648	0.853242	0	0.511945	0	0	0.853242	0.341297	0.341297	0.341297	0.682594	0	0	0	0	29.8635	0	2.21843	3.24232	1.36519	0.511945	1.36519	0	0	8.19113	4.09556	0.682594	0	2.04778	2.21843	1.19454	0.682594	2.55973	0	0.682594	1.19454	2.21843	0	0	0	0	0
47.1529	17131.6	0.925926	0.694444	0.231481	5.78704	1.85185	0	0.925926	0	0	0	0.231481	0	0.694444	0	0	0	0.462963	0	0	0.231481	2.08333	19.213	0.925926	2.08333	3.47222	2.08333	3.47222	0	0	0	4.16667	1.85185	0	0	2.08333	2.08333	2.31481	1.62037	3.47222	0	0	0.231481	0.694444	0.231481	0	0.231481	0.462963	0.231481
49.6147	13777.8	0	0	0.438596	2.63158	2.85088	0	0	1.75439	0.219298	0.438596	1.09649	1.53509	1.31579	0.219298	0	0	0.219298	0	0	0	1.75439	31.5789	1.09649	0.219298	3.72807	1.09649	0.438596	0	0	0	5.48246	4.38596	0.657895	0	0.438596	2.19298	1.31579	0.438596	3.72807	0.219298	0	1.09649	0.657895	1.53509	0	0.219298	0.438596	0.219298
52.0765	16947.2	0.351494	0.702988	0	4.21793	0.702988	0	0	0	0.351494	0.351494	1.23023	0.702988	0.702988	0.175747	0	0	1.40598	0	0	0	2.10896	20.5624	1.05448	0.527241	5.09666	0.878735	1.58172	0	0	0	10.1933	7.38137	0.878735	0	0.527241	1.58172	1.05448	0.175747	4.39367	0.351494	0.175747	0.175747	0.351494	0.878735	0	0.351494	0	0.702988
54.5383	19726.6	0.608519	0	1.41988	6.89655	0	0	0.20284	1.62272	0.20284	0	0.40568	0	0	0.20284	0.40568	0	0.20284	0	0	0	1.62272	16.8357	1.21704	2.43408	2.63692	0	2.83976	0.811359	0.20284	0	11.5619	7.50507	0	0	0.608519	0.811359	1.21704	0.20284	3.65112	0	0.20284	0.20284	0	0.608519	0	0	0	0
57.0821	7892.72	0.40404	0.20202	0.20202	3.43434	2.0202	0	0.20202	1.0101	0	0	1.61616	0.808081	1.81818	0	0.606061	0	0.20202	0	0	0	3.23232	3.0303	0.40404	1.41414	3.63636	0	4.24242	1.41414	0	0	7.87879	6.26263	0.40404	0	1.41414	3.63636	0.40404	0.606061	3.63636	0.606061	0	1.0101	1.61616	0.20202	0.40404	0	0	0.20202
58.1489	17326	0	0.433839	0	6.29067	1.51844	0	0.21692	2.1692	0.433839	0	0.650759	0	0.650759	0	0.21692	0.650759	0.867679	0	0.867679	0	3.90456	3.47072	1.73536	2.60304	4.33839	0.21692	2.38612	0.650759	0	0	10.1952	5.20607	0	0	0	1.73536	1.0846	1.0846	2.81996	0	0	0	1.0846	0	0	0.650759	0	0
60.6106	16779.3	0	0.201613	0	2.01613	0.201613	0	0.403226	0.403226	0.403226	0.604839	0.403226	0.201613	0.201613	0.403226	0	0.403226	0	0	0.604839	0	1.41129	39.3145	0.403226	1.00806	3.22581	0	4.6371	0	0	0	4.43548	3.83065	0	0	0.604839	1.41129	0	0	3.22581	0	0	0.201613	0.201613	1.6129	0	0	0	0.201613
63.5812	7178.57	0	0	1.21704	2.43408	1.41988	0	0.20284	2.0284	0.20284	0.608519	1.41988	0	1.82556	0	0	0	0.811359	0	0	0	0.20284	11.359	1.41988	1.41988	3.24544	0	0.608519	0	0.40568	1.41988	4.66531	3.44828	1.41988	0	1.0142	3.0426	2.23124	0	5.07099	0	0.40568	0.608519	0.811359	0.811359	0.20284	0	0.20284	0
66.043	11402.6	0	0	1.28205	2.5641	0.854701	0	0.213675	0	0	0.42735	0.641026	0	1.06838	0	0.42735	0	0.641026	0	0	0	1.06838	23.9316	1.28205	2.5641	4.48718	0	2.35043	0.42735	0	1.7094	6.41026	2.77778	0.641026	0.213675	0.641026	1.49573	2.35043	0	3.4188	0	0	0.42735	0.213675	0	0	0	0	0.213675
68.5048	13294.1	0.759013	0.189753	0.759013	4.36433	0.56926	0	0	0.56926	0.379507	0.948767	0.759013	0	1.13852	0	0.948767	0	0	0	0	0.189753	0.379507	29.4118	0.948767	1.13852	5.88235	0	0.56926	0.189753	0	0.948767	3.41556	3.03605	0.189753	0.379507	0.948767	1.51803	1.32827	0.189753	3.79507	0	0	0	0.379507	0.948767	0	0	0	0
71.3445	24113.2	0	0.15748	0.314961	5.66929	6.14173	0	0	2.67717	0.314961	0.787402	0.629921	0.314961	0.787402	0.15748	0.629921	0.314961	0.472441	0	0	0	0.314961	18.7402	1.10236	2.20472	6.61417	0	0.15748	1.10236	0	4.56693	4.09449	1.88976	0.787402	0	0.787402	2.3622	0.944882	0.472441	3.62205	0	0.314961	0	0.15748	0.629921	0	0	0	0.15748
75.5526	18593.8	0	0	0.419287	7.96646	4.8218	0	0	1.25786	0.209644	0.628931	0.419287	0.838574	0.838574	0.838574	0.838574	0.628931	0	0	0	0	0.419287	8.80503	1.67715	1.46751	3.3543	0	0	0.209644	0	6.91824	6.28931	2.93501	0.838574	0	1.04822	1.04822	1.67715	0	2.51572	0.209644	0.209644	0.209644	0	1.04822	0	0	0	0.419287
78.5161	23269.2	0.327869	0.163934	1.31148	4.42623	5.7377	0	0.491803	1.47541	0	0.163934	0.819672	0.327869	2.29508	0.163934	0.163934	0.327869	0.491803	0	0	0	1.47541	6.06557	2.95082	1.31148	5.2459	0.327869	0.819672	0.327869	0	1.14754	2.62295	3.77049	0.327869	0	2.13115	1.63934	0.983607	0	2.13115	0.163934	0	0.491803	0.327869	0.327869	0	0	0	0.327869
80.6103	26401.6	0.610687	0.458015	1.22137	4.42748	6.56489	0	0	0.916031	0.152672	0.458015	0.610687	0	1.83206	0	0	0.916031	1.37405	0	0	0	2.59542	7.48092	1.83206	0.916031	3.20611	0	0.152672	0.305344	0	4.73282	5.49618	2.59542	0.305344	0	1.52672	1.98473	2.29008	0.458015	2.1374	0.610687	0.610687	0.610687	0.610687	0.763359	0	0	0	0.610687
82.0921	13834.6	0.673401	0	0.505051	1.51515	4.0404	0	0	1.85185	0.16835	0.3367	0.16835	0.16835	1.17845	0	0.3367	0.673401	0.673401	0	0	0	1.6835	19.1919	1.51515	2.18855	4.7138	0	0.3367	0.16835	0	3.7037	2.86195	1.85185	0.673401	0	0.841751	1.3468	0.505051	0.16835	2.18855	0	0	1.0101	1.6835	3.53535	0	0	0	0.505051
85.0555	13005.9	0.371058	0	0.927644	2.5974	3.15399	0	0	1.2987	0	0.556586	0.556586	0.371058	1.66976	0.371058	1.85529	0	0.556586	0	0	0	1.2987	3.33952	1.2987	1.2987	7.23562	0	1.11317	1.48423	0	3.33952	4.82375	1.48423	0.927644	0	0.556586	1.48423	0.371058	0.371058	1.2987	0	0.185529	1.85529	2.5974	1.2987	0.185529	0.371058	0	0.185529
94.1436	16705.4	0.374532	0.374532	1.1236	3.93258	2.43446	0	0	1.1236	0.561798	0.93633	0.749064	0.187266	1.31086	0.187266	0	0.187266	0.749064	0	0	0	1.68539	8.98876	1.68539	2.43446	2.80899	0.749064	1.68539	5.05618	0	0.561798	1.87266	3.37079	0.561798	0	0.374532	2.05993	0.749064	0	2.80899	0	0.93633	2.43446	4.30712	0.93633	0	0	0	1.1236
97.1071	189.753	0.490196	0	0.490196	2.45098	2.45098	0	0	3.43137	0	0.490196	0.490196	0.490196	0.980392	0	0.490196	0.980392	0.490196	0	0	0	2.94118	7.84314	0.980392	0	2.94118	0	0	1.47059	0	1.96078	1.47059	1.96078	0.980392	0	0	0.490196	0.980392	0	4.41176	0.490196	0	0.490196	1.96078	0.980392	0	0	0	0
102.461	23184.5	0.334448	0.334448	3.67893	5.68562	0.668896	0	0	1.67224	0.501672	0.83612	0.668896	0.167224	0.167224	0.167224	0.167224	0.334448	0.668896	0	0	0	0.334448	8.19398	1.50502	3.01003	1.00334	0	0.167224	2.34114	0	4.34783	5.18395	4.01338	1.33779	0	1.00334	0.668896	2.17391	0	2.17391	0	0.334448	0.167224	1.33779	0.668896	0	0	0	0.83612
105.425	19696.4	0.191939	0	1.53551	4.9904	5.18234	0	0	1.34357	0.767754	0.191939	0.191939	0.959693	0.767754	0.191939	0.191939	0.959693	0.575816	0	0	0	1.34357	3.07102	1.34357	2.11132	2.11132	1.34357	1.15163	0.383877	0	0.383877	4.60653	1.53551	0.575816	0	1.53551	0.959693	1.72745	0.383877	2.68714	0	0.575816	0.959693	3.45489	0	0	0	0	0
108.419	15390.6	0	0	3.46021	4.15225	5.53633	0	0	1.03806	0.346021	0.346021	0.346021	0.519031	1.21107	0.346021	0.519031	0.346021	0.865052	0	0.17301	0	1.38408	6.05536	0.865052	0.17301	5.88235	0.519031	0.865052	1.38408	0	1.7301	1.55709	2.76817	0.519031	0	0.692042	1.90311	1.7301	0	1.55709	0.17301	0	5.53633	8.3045	1.7301	0.346021	0	0	0
111.969	28247	0	0	0.849858	3.54108	1.41643	0	0	1.983	0.424929	0.424929	0.849858	0.566572	1.41643	0.283286	0.424929	0	0.566572	0	0	0	1.55807	20.255	0.849858	0.991501	5.38244	0.991501	0.141643	0.141643	0	0.849858	3.25779	2.40793	0.566572	0	1.13314	1.27479	2.26629	0	1.69972	0	0.283286	1.27479	6.79887	0	0	0	0	0.283286
115.519	33944.2	0.591017	0.118203	2.36407	4.49173	2.00946	0	0	1.65485	0.472813	1.06383	0.591017	0.827423	0.827423	0.35461	0.472813	0.35461	0	0	0	0	1.65485	3.30969	0.945626	1.41844	3.6643	1.18203	0.35461	0.70922	0	1.30024	1.89125	1.77305	0	0	0	0.945626	2.12766	0.236407	1.18203	0.591017	0	1.06383	4.01891	0	0.236407	0	0	0.827423
119.14	33214.3	0.121065	0.726392	1.08959	3.02663	1.93705	0	0	1.45278	1.33172	0.484262	0.605327	0.484262	0.726392	0	0.242131	0.484262	0.121065	0	0	0	1.45278	1.81598	2.30024	0.847458	5.9322	0.605327	0.847458	0.242131	0	1.33172	4.60048	1.33172	1.08959	0	1.45278	0.726392	1.57385	0.726392	0.847458	0.242131	0.242131	0.605327	3.5109	0	0.242131	0	0	0.484262
120.122	21395.3	0.4329	0.4329	0.865801	3.4632	0	0	0	2.1645	0	0	0.4329	0	1.7316	0	0	1.2987	1.7316	0	0	0	1.2987	0.4329	1.2987	1.2987	3.0303	0.4329	0	1.2987	0	3.4632	4.7619	1.2987	2.5974	0	1.2987	1.2987	1.7316	0	8.65801	0	0.4329	1.7316	0.4329	0	0	0	0	0.4329
122.689	17470.4	0.451467	0.225734	0.902935	2.7088	0.451467	0	0	2.0316	0.451467	0.225734	1.12867	1.3544	0.225734	0	0.451467	1.58014	0.225734	0	0	0	1.58014	3.83747	1.58014	0.451467	3.386	0.225734	1.3544	0.677201	0	0.225734	5.86907	3.386	0.451467	0	0.902935	0.902935	1.12867	0.451467	3.83747	0	0.225734	0.225734	3.16027	0	0.451467	0	0	0.451467
126.239	11566.7	0.826446	0.413223	1.03306	4.33884	0.826446	0	0	2.47934	0.206612	0	0.826446	0.619835	0.619835	0	0	0.413223	0.206612	0	0	0	1.44628	7.2314	0.619835	1.65289	10.3306	0.206612	4.95868	0.826446	0	1.44628	7.43802	7.2314	1.03306	0	1.03306	2.06612	1.65289	0.206612	0.413223	1.03306	0	3.09917	3.5124	0	0	0	0	0
129.789	6210.94	0.974026	0	1.2987	2.27273	3.24675	0	0	0	0	0.974026	0.974026	0.324675	1.62338	0.324675	0.649351	0.974026	0	0	0	0	1.94805	6.81818	2.92208	0	7.14286	0	0.974026	0.649351	0	0	4.87013	5.84416	0.649351	0.324675	0.649351	1.62338	1.62338	0	4.22078	0	0	1.62338	6.81818	0	0	0	0.649351	0.649351
130.499	8888.89	0	0	0.990099	5.94059	4.62046	0	0	2.31023	0	0	0	0	0.660066	0	0	0	0	0	0	0	0.330033	5.94059	0.990099	0	8.91089	0	5.94059	0.990099	0	1.65017	3.63036	7.92079	0	0	0.660066	2.9703	0.990099	0	4.62046	0	0	2.9703	6.27063	0	0	1.65017	0	0.330033
134.049	12382.8	0	0	1.89274	12.3028	3.15457	0	0	3.47003	0	0	0.315457	0	0.630915	0	0	0.315457	0.315457	0.315457	0	0	0.630915	4.10095	0.630915	2.52366	13.8801	0	1.89274	0	0	0	1.57729	10.4101	0	0	0.315457	1.57729	0.315457	0.315457	5.36278	0	0	1.89274	5.99369	0.315457	0	0	0	0.315457
137.599	11158.2	0	0	0	3.5503	1.18343	0	0	1.77515	0	0	1.18343	0	1.18343	0	2.95858	0	0.591716	0	0	0	0.887574	13.6095	0.591716	2.36686	7.69231	0	5.91716	0.591716	0	0.591716	2.95858	3.25444	0	0	0.887574	2.36686	0	0.295858	4.43787	0.887574	0	2.36686	8.28402	0	0.591716	0.591716	0.591716	0
141.148	10744.8	0	0.58651	0.58651	2.93255	2.93255	0	0	0.879765	0	0	0	0.293255	0.293255	0	0.879765	0	0	0	0	0	0.879765	36.0704	0.293255	0.879765	3.81232	0.293255	2.34604	0	0	2.05279	1.17302	2.34604	0	0	0.58651	0.879765	0	0	1.75953	0	0	2.6393	10.2639	0	0	0.58651	0.879765	0
144.698	12554.7	0.574713	0.287356	0	0.574713	4.02299	0	0	1.43678	0	0	0.287356	0	0.287356	0	0.287356	0.574713	0.287356	0	0	0	2.01149	11.4943	0.862069	0.862069	3.44828	0	1.14943	0.287356	0	3.73563	1.43678	3.73563	0.862069	0	0	2.87356	0.574713	0	5.74713	0	0	4.31034	17.8161	0	0.287356	0.862069	0	0.287356
147.964	18433	0	0	3.13199	8.50112	5.14541	0	0	1.78971	0	0.447427	0.671141	0.447427	0.223714	0	0.447427	0	0.223714	0	0	0	0	25.5034	1.11857	3.3557	7.38255	0	1.11857	0.447427	0	1.34228	4.02685	2.23714	0	0	0.671141	1.11857	0	0	3.80313	0	0	0.447427	5.36913	0	0	0.671141	0.671141	0
149.123	12304.5	0.697674	0	2.09302	6.27907	3.48837	0	0	2.32558	0	0	0	0	0.465116	0.232558	1.16279	0	0	0	0	0	0	17.907	0	1.16279	5.5814	0	1.16279	0.465116	0	0	6.51163	3.25581	0	0	0.930233	0.930233	0	0	3.48837	0	0	1.16279	3.02326	0.232558	0.232558	1.16279	0	0
152.673	14040.4	0.245098	0	3.18627	10.049	5.39216	0	0	0	0	0	0.245098	0	1.71569	0	0	0	0	0	0	0	0	5.14706	1.22549	0.980392	9.55882	0	1.22549	0	0	0	8.82353	2.69608	0.245098	0	0	0.980392	0	0.490196	5.88235	0	0	0.245098	3.18627	0.245098	0.245098	1.22549	0	0.245098
156.321	14423.7	0	0	1.95228	2.81996	0.867679	0	0	0.650759	0	0	0.867679	0	0.433839	0	2.60304	0.650759	0	0	0	0	0	44.4685	0.650759	0.21692	3.03688	0	1.30152	0.867679	0	0	3.2538	3.2538	0	0	0	0.650759	0.21692	0	3.68764	0	0	1.0846	2.1692	0.21692	0	0.867679	0.650759	0
159.168	11850.4	0	0	10.0917	3.89908	1.14679	0	0	2.06422	0	0	0.229358	0	1.14679	0	0.917431	0.688073	0	0	0	0	0	5.27523	0.688073	0	9.86239	0.688073	0.917431	0.229358	0	0	4.81651	3.21101	0.458716	0	0.458716	1.14679	0	0	3.21101	0	0	0.917431	5.27523	0.229358	0.458716	0.688073	2.06422	0
162.015	10807.5	0.473934	0	1.18483	3.08057	1.89573	0	0	2.8436	0	0	0.473934	0	0	0	0	0	0.7109	0	0	0	0.947867	6.63507	1.18483	0	9.95261	0	1.65877	0.7109	0	1.89573	13.0332	4.50237	0	0	0.7109	1.4218	0.7109	0	4.02844	0	0	2.36967	6.16114	0	0.473934	0.236967	1.89573	0
164.767	5244.57	0	0.49505	0.247525	3.21782	2.47525	0	0	3.71287	0	0	0.49505	0	0.990099	0	0.49505	0	0.247525	0	0	0	0	3.21782	0.247525	0.247525	3.21782	0	3.21782	0.247525	0	1.48515	6.18812	5.19802	0.742574	0	0.247525	1.23762	0.49505	0	5.69307	0.990099	0	3.71287	6.68317	0.247525	0	0.742574	0.742574	0.49505
167.67	11574.5	0.246305	0	0.492611	4.18719	3.44828	0	0	2.95567	0	0.738916	0	0	0.985222	0	6.65025	0	0.492611	0	0.985222	0	1.23153	3.44828	1.97044	1.72414	7.38916	0.246305	3.20197	0	0	1.72414	6.15764	3.20197	0.985222	0	0.246305	2.21675	0	0	4.18719	0	0	2.21675	5.66502	0	0.738916	0.246305	0.492611	0
170.517	18683.7	0	0.197239	2.16963	2.95858	3.94477	0	0	2.95858	0	0	0.788955	0	0.986193	0	3.94477	0	0	0	0	0	0	24.6548	0.197239	0.394477	2.76134	0	1.77515	0.394477	0	3.94477	4.53649	0.788955	0	0	0.788955	0	0	0	3.35306	0	0	1.97239	8.28402	0.197239	0.197239	0	0.394477	0
172.813	14832.5	0.208333	0	1.875	2.70833	3.95833	0	0	3.125	0.208333	0.625	0.625	0.416667	0.833333	0	3.95833	0.416667	0	0	0	0	0	2.5	1.25	0.625	6.25	0	1.66667	0.416667	0	3.75	7.5	3.75	1.04167	0	0	2.91667	2.08333	0	3.95833	0.208333	0.208333	4.375	7.91667	0	0	0.208333	0	0
175.66	16505.6	0.454545	0	0.681818	2.95455	2.72727	0	0	3.18182	0.227273	0.681818	2.04545	0	1.36364	0	5.22727	0.454545	0.227273	0	0	0	0.454545	2.27273	1.13636	0.909091	3.40909	0	2.5	0	0	2.72727	8.18182	4.54545	0.454545	0	0.454545	1.59091	0	0	3.18182	0	0.227273	1.13636	8.18182	0	0.454545	0.454545	0.454545	0
178.526	12006.1	0	0	0	3.3419	0.771208	0	0	0.514139	0	0.771208	0	0.514139	0.514139	0	1.02828	0.514139	0	0	0	0	0	39.3316	0.771208	0.257069	8.74036	0.257069	0	0.514139	0	0.514139	5.39846	0.257069	0	0	0	0.514139	0	0	0	1.02828	0	1.54242	10.2828	0	0	1.02828	0	0.771208
180.518	11807.6	0.2331	0	0	1.1655	0	0	0	3.9627	0	0	0.2331	0.699301	0.4662	0	1.3986	0	0.4662	0	0	0.2331	0.4662	3.9627	0.2331	0	4.662	0	1.8648	0.699301	0	0.932401	6.52681	1.3986	0.4662	0	0.2331	1.1655	0	0	4.8951	1.1655	0	7.92541	17.9487	0	0.2331	0.4662	0	0.2331
182.17	10295.5	0.232558	0.232558	0.465116	2.32558	0.465116	0	0	1.86047	0	0	0	0.465116	1.16279	0.232558	2.32558	0	0.930233	0	0	0	0.465116	1.39535	0	0	9.76744	0	0	0	0	1.62791	8.83721	2.7907	1.62791	0	0	0.697674	0	0	3.95349	0.930233	0	9.06977	11.1628	0	0.232558	0.232558	2.09302	0.465116
185.035	12713.3	0	0	0	2.26757	2.04082	0	0	3.62812	0	0.226757	0.907029	0.453515	1.13379	0	0.680272	0	1.36054	0	0	0	0.453515	2.04082	0.226757	0.680272	8.61678	0.226757	2.04082	0.907029	0	0.453515	13.3787	2.04082	0.453515	0.453515	0.226757	2.49433	0.453515	0	3.1746	0.226757	0	3.40136	9.07029	0.226757	0.226757	0.226757	0.680272	0
187.882	7865.17	0.2457	0	0.4914	5.40541	4.4226	0	0	1.7199	0	0.982801	0.2457	0.2457	0.982801	0	4.914	0	0.2457	0	0.4914	0	0.737101	1.2285	0	0	4.6683	0.2457	0.982801	0	0	0.4914	12.7764	2.457	0	0.2457	0.2457	1.2285	0.4914	0	3.4398	1.2285	0	2.457	9.58231	0	0	0	0	0
190.729	7688.44	0.197628	0.395257	0	2.56917	1.18577	0	0	3.35968	0.395257	0.592885	0.197628	0.790514	1.58103	0.197628	1.77866	0.592885	1.18577	0	0	0	0.790514	0.197628	0.197628	0.395257	6.52174	0	1.3834	0	0	0.592885	4.74308	2.37154	0.790514	0	0.988142	0.592885	0	1.18577	0.395257	0.592885	0	6.52174	10.2767	0.395257	0.197628	0.197628	0.592885	0.395257
195.682	22770.8	0.442478	0.221239	0.663717	1.32743	1.32743	0	0	1.99115	0.221239	1.10619	0.221239	1.32743	0.221239	0.221239	1.99115	0	0.442478	0	0	0	0.884956	8.62832	0.221239	0.884956	6.19469	0.442478	2.43363	0	0	1.54867	2.43363	2.43363	1.32743	0	0.663717	0.663717	0.884956	0	4.20354	0.663717	0	3.53982	7.52212	0	0.663717	0.442478	0.221239	0
199.203	27516.8	0.162866	0.488599	0	2.9316	2.9316	0	0	1.9544	0.651466	0.162866	0.814332	0	1.4658	0	0.325733	0.814332	1.62866	0	0.162866	0	1.30293	2.9316	2.76873	0.325733	2.443	0	1.30293	0.162866	0	2.28013	4.72313	2.443	0.325733	0	0.651466	1.30293	1.30293	0	3.58306	0	0	2.443	7.65472	0	0.651466	0.162866	0	0.977199
202.724	30595.2	0	0	0	2.47148	2.6616	0	0	1.52091	0.190114	0	0.570342	0.190114	2.28137	0.190114	1.90114	0.190114	0.190114	0	0	0	2.28137	4.75285	0.760456	0.190114	6.27376	0	0	0	0	1.71103	2.09125	0.380228	0.95057	0	0.95057	0.95057	0.760456	0	3.61217	0	0.190114	4.94297	8.1749	0	0.190114	0.190114	0	0.190114
206.245	24393.3	0.352113	0	1.23239	2.64085	0.528169	0	0	1.76056	0.704225	0	0.528169	0.880282	1.05634	0	0.352113	0.352113	0	0	0	0	0.176056	6.8662	1.76056	1.05634	7.92254	0.352113	0.528169	0	0	0	1.93662	0.704225	0.704225	0.176056	1.23239	0.176056	0.176056	0.176056	4.22535	0	0	1.93662	4.92958	0.176056	0.880282	0.176056	0	1.05634
211.362	861.111	0	0	0	1.0929	1.0929	0	0	0	0.546448	1.0929	0	0	0	0	1.63934	0	0	0	0	0	0	0	0.546448	1.63934	4.37158	0	0	0	0	0	0	0.546448	0	0	0	0.546448	0	0	7.65027	0	0.546448	2.18579	2.18579	0	0.546448	0	0	0.546448
214.882	25403.4	0.147493	0	0.147493	3.24484	1.03245	0	0.147493	1.9174	1.03245	0	0.737463	0	0.884956	0.589971	0.294985	0	1.47493	0	0	0	1.47493	0.737463	2.21239	0.147493	5.30973	0	0.737463	0.737463	0	1.62242	3.9823	3.53982	0.294985	0.147493	0.884956	1.47493	1.32743	0.147493	3.68732	0.737463	0.147493	2.65487	7.52212	0	0.147493	0	0	0.589971
218.403	13567.3	0.455581	0	0.22779	0.683371	0.911162	0	0	1.36674	2.05011	0.683371	0.911162	0	0.683371	0.22779	1.36674	0.683371	0	0	0.455581	0	1.36674	6.37813	1.59453	0.22779	6.37813	0	2.05011	0.683371	0	2.2779	5.01139	3.87244	0.22779	0	0.22779	0.22779	2.2779	0.22779	2.2779	0	0.22779	2.2779	5.01139	0	0	0.455581	0	0
221.901	10734.6	0.220264	0	0.220264	0.881057	0.660793	0	0.220264	2.20264	0	0.881057	0	0	1.54185	0	4.18502	1.76211	0	0	0	0.220264	0.881057	2.20264	0.660793	0	4.40529	0.660793	0.220264	0.660793	0	1.76211	4.84581	3.0837	0.660793	0.660793	0.881057	1.32159	1.10132	0	3.74449	0	0.220264	3.96476	10.5727	0.220264	0.440529	0.220264	0	0
228.849	13021.4	0.465116	0	0.697674	0.465116	0.465116	0	0	2.09302	0	0.465116	0.465116	0.465116	2.32558	0	1.16279	0.465116	0	0	0.465116	0	3.25581	13.2558	0.465116	0.930233	5.5814	0	0	0.232558	0	3.02326	3.48837	2.55814	0.232558	0.465116	0.465116	0.232558	0	0	4.18605	0.697674	0.232558	3.48837	8.13953	0.465116	0.232558	0.697674	0	0
232.369	19669	0.243309	0	2.18978	1.21655	0.973236	0	0.243309	1.94647	0	1.21655	0.486618	0.973236	1.21655	0	1.94647	0	0.243309	0	0	0	1.70316	0.243309	0.729927	0.486618	7.78589	0	1.21655	0.729927	0	3.64964	3.16302	3.16302	0.243309	0	1.21655	0	0.973236	0	3.16302	0.486618	0.486618	2.91971	13.1387	2.18978	0.729927	0	0	0.243309
235.914	25098	0	0.315956	0.789889	2.05371	1.26382	0	0.157978	0.947867	0.315956	0.473934	1.26382	0.631912	1.4218	0.473934	1.57978	0	0.157978	0	0	0.315956	1.4218	0.473934	1.26382	0	4.58136	0.631912	0.473934	0	0	1.57978	3.47551	4.42338	0.315956	0	1.57978	0.315956	1.10585	0	4.2654	0	0	2.52765	11.0585	0.315956	0.947867	0	0	0.473934
238.332	11072.7	0	0.263852	1.05541	2.63852	3.69393	0	0	0.263852	0	0.791557	0.527704	0.791557	0.263852	0	3.69393	0.527704	0.791557	0	0	0	0	0.263852	0.263852	0.527704	3.43008	0	0	0.527704	0	0.527704	3.95778	1.58311	0.527704	0	0.791557	0.263852	0.791557	0	7.12401	0	0	0.791557	3.16623	0	0	0.527704	0	1.84697
239.994	5660.38	0.796813	0.398406	3.18725	1.99203	0.796813	0	0	2.39044	0	0	0	0	2.39044	0	1.19522	0	0	0	0	0.796813	3.18725	4.38247	0.796813	0	7.17131	0	0	1.59363	0	4.38247	5.57769	3.18725	0.796813	0	0.398406	0.796813	1.19522	0	8.36653	0	0	2.39044	4.38247	0	0	0	0	0
251.825	8103.13	0.249377	0	4.2394	0	1.24688	0	0	0.249377	0	0	0.498753	0	1.74564	0	0.249377	0.249377	0	0	0	0	2.49377	9.47631	1.49626	0.997506	0.249377	0	0.498753	0	0	0.997506	8.72818	8.22943	0.498753	0	0	3.2419	0	0	6.48379	0	0	0.498753	9.22693	1.24688	0.498753	0	0	0.249377
254.333	6994.11	0.332226	0.332226	0	2.65781	3.32226	2.32558	0	0.996678	0	1.3289	0	0.996678	0	0	2.32558	0	0.332226	0	0	0	0.332226	1.99336	0.664452	2.32558	0.996678	0.332226	1.66113	0.664452	0	1.99336	6.97674	2.32558	0.996678	0	0.332226	0.996678	0.664452	0	0.664452	0	0	4.31894	7.6412	2.65781	1.3289	0.664452	0.332226	0.664452
258.312	7127.88	0	0	0.578035	4.33526	2.31214	2.02312	0	2.02312	0	0	0	0	0.867052	0	2.89017	0	0	0	0	0	0.289017	2.89017	0.289017	0.578035	2.02312	0	2.31214	0.867052	0	2.31214	9.82659	7.22543	0	0	0.289017	1.44509	1.7341	0	6.06936	0.578035	0	1.44509	8.95954	0.289017	0	0	0.578035	0
260.821	9393.26	0	0	1.26263	1.0101	1.76768	0.252525	0	1.26263	0.252525	0	0.757576	0.505051	0.505051	0	2.52525	0	0.252525	0	0	0	0	1.26263	1.76768	0.505051	3.78788	0	1.51515	1.0101	0	6.31313	13.1313	2.27273	0	0.505051	0	1.51515	1.26263	0	5.80808	0	0	4.29293	7.82828	0	1.51515	0	0	0
263.329	12469.4	0.265957	0	0.531915	1.32979	0.265957	0	0.265957	1.06383	0	0.265957	0	0.265957	1.06383	0	1.8617	0	0.265957	0	0	0.265957	1.06383	17.2872	0	0	5.31915	0	1.06383	0	0	4.78723	7.18085	1.59574	0.265957	0	0.265957	0.265957	0.531915	0	5.05319	0.265957	0	1.32979	10.6383	0.265957	0	0	0	0
265.837	11798.2	0	0	1.46699	4.15648	2.20049	0	0	0.977995	0	0.488998	0	0.733496	1.22249	0	2.44499	0	0.244499	0	0	0	0.977995	2.93399	0.244499	0.244499	1.46699	0.244499	4.40098	0.244499	0	11.0024	13.4474	3.42298	0.244499	0	0	1.46699	0.488998	0.244499	5.37897	0.244499	0	2.20049	8.06846	0	1.71149	0.244499	0	0
270.853	9496.72	0.238095	0	0.238095	4.28571	0.952381	0	0.238095	0.238095	0	0.47619	0.47619	0.238095	1.42857	0	4.7619	0	0.238095	0	0	0	1.19048	13.3333	0.47619	0.238095	3.57143	0.238095	2.38095	0	0	1.66667	4.04762	4.04762	0.714286	0	0	1.42857	0.952381	0	4.7619	0	0.238095	1.66667	11.1905	0.238095	0.952381	0	2.14286	0
275.809	5582.52	0.536193	0	1.34048	4.02145	1.07239	0	0	4.02145	0	0	0.80429	0.268097	1.60858	0.536193	1.60858	0.268097	0	0	0	0.268097	0	1.60858	0.80429	0	6.43432	0	0.268097	0.536193	0	1.34048	2.68097	0.80429	1.60858	0	0.268097	1.34048	0.268097	0	4.55764	0	0	5.36193	8.57909	0.536193	0	0.268097	0	0
288.242	14125	0.7109	0.473934	0	1.18483	0.7109	0	0	1.4218	0	0.7109	0.947867	0.473934	0.473934	0.236967	0.7109	1.18483	0.236967	0	0.473934	0	0.7109	0.947867	0.947867	1.18483	4.2654	0	2.36967	0	0	0	1.89573	3.31754	1.4218	0	0.7109	0.947867	2.60664	0	4.2654	0.7109	0	2.60664	7.81991	0	0.473934	0.473934	0	0.947867
290.369	20545.5	0	0.221239	0.663717	4.20354	1.32743	0	0	1.76991	0.221239	0.221239	0	2.21239	0.663717	0.221239	1.10619	0.884956	0.221239	0	0	0	0.884956	0.663717	0	0	3.76106	0.221239	1.99115	0	0	1.54867	3.76106	5.53097	0.442478	0	1.32743	0.663717	0.884956	0.442478	3.53982	0.663717	0.221239	3.09735	9.0708	0.221239	0.663717	0	0	0
294.514	16930.9	0.230947	0	0.461894	1.38568	0.461894	0	0	1.38568	0	0.923788	0	0.461894	0.692841	0	2.30947	0.230947	0.692841	0	0.461894	0	0.692841	6.92841	0.692841	0	2.54042	0	1.61663	0	0	0.692841	2.30947	2.30947	0.461894	0	0.230947	0	1.38568	0	3.23326	1.15473	0	2.77136	11.7783	0.461894	0	0	0	0.230947
300.703	10769.2	0.25641	0	0.25641	0.25641	2.05128	0	0.25641	0.769231	0.25641	1.28205	0	0.512821	1.28205	0	3.33333	0	1.02564	0	0.512821	0	0.769231	10.5128	0.512821	0	4.10256	0	1.02564	0.25641	0	0	1.53846	2.5641	0.512821	0	1.02564	0	0.512821	0	4.35897	0.25641	0	2.5641	8.20513	0	0.25641	0	0.25641	0.25641
302.885	7778.78	0.453515	0.226757	0	2.72109	0.680272	0	0	1.13379	0	0	0.226757	0	0.453515	0	6.80272	0.453515	0.453515	0	0	0	0	0.907029	0	1.81406	1.13379	0	0.680272	0.226757	0	0.680272	4.30839	1.36054	1.36054	0	0.226757	0	0.680272	0	2.26757	0.226757	0.907029	3.40136	10.4308	1.13379	0.453515	0.226757	0.453515	0.226757
304.875	17112.3	0.497512	0.248756	0.497512	4.22886	1.99005	0	0	1.24378	0	0	0.497512	0.248756	0.248756	0	6.46766	0	1.49254	0	1.24378	0	0.248756	2.23881	0.746269	0.248756	2.48756	0	0	0.497512	0	0.995025	3.73134	1.24378	0.746269	0	0.995025	0.995025	0.995025	0	4.22886	0.497512	0	1.99005	7.9602	1.24378	1.24378	0	0	0.497512
309.019	12912.1	0.507614	0.253807	0	2.53807	0.507614	0	0	1.26904	0	0.507614	0	0.761421	1.26904	0	2.28426	0.507614	0.253807	0	0.253807	0	0.253807	11.9289	0.507614	0	2.53807	0.507614	0	0.253807	0	0.761421	3.5533	5.07614	2.03046	0	0	0	1.01523	0	2.79188	0.507614	0.253807	0.761421	1.26904	0.253807	0.253807	0.253807	0	0.253807
317.308	14307.3	0	0.25974	0.519481	2.85714	0.779221	0	0	1.03896	0.25974	0	1.03896	0.519481	1.2987	1.55844	4.41558	0	1.03896	0	1.03896	0	1.03896	6.23377	1.81818	0	3.63636	0	0	0.25974	0	0.25974	3.8961	2.07792	0.25974	0	0.519481	0	0.779221	0	2.07792	0.25974	0	1.81818	2.85714	0	0.779221	0	0	0.25974
319.325	10883.7	0	0	0.810811	1.62162	1.62162	0	0	2.16216	0	0	0.27027	0.27027	1.08108	0.27027	0	0.27027	0	0	0.27027	0	1.89189	20.5405	1.08108	0	1.08108	0	0.27027	0.27027	0	0	1.08108	2.43243	0.27027	0	0.27027	0	1.89189	0	1.62162	0.27027	0.27027	1.08108	2.43243	0.27027	0.27027	0	0	0.540541
323.497	13772.7	0.245098	0	1.22549	0.735294	0	0	1.47059	2.69608	0.245098	0.245098	0.735294	0.245098	0.490196	0.245098	2.45098	0	0	0	0	0	1.47059	1.47059	1.22549	0.735294	2.20588	0	0	0.245098	0	0.735294	3.18627	3.18627	0.490196	0	0.980392	0	0.735294	0	3.67647	0	0.735294	2.20588	5.14706	0	0.490196	1.47059	0	0
324.671	7770.27	0	0	0	1.61943	0	0	0	1.21457	0	0	0	0	0.809717	0	0	0	0	0	0	0	0	0	4.04858	0	2.02429	0	0	0	0	1.21457	3.64372	1.61943	0.404858	0	0	0	1.21457	0	2.42915	0	0	0.404858	0.404858	0	0	0	0	0.809717
332.007	14102.6	0.791557	0	1.05541	2.90237	0.527704	0	0	1.84697	0.527704	0.527704	0.263852	0	0.527704	0	0.263852	0.263852	0.791557	0	0	0	1.31926	1.84697	2.11082	0.791557	1.58311	0	1.31926	0.791557	0	0	8.70712	5.5409	0.527704	0	1.05541	0.263852	2.37467	0	4.48549	0	0	0.527704	0.791557	2.37467	0	0	0	0.527704
334.231	7224.33	0	0	1.59363	4.38247	1.19522	0	0	12.3506	0	0	1.19522	0	0.796813	0	0.796813	0.398406	0	0	0	0	0.796813	2.78884	0.796813	0	4.38247	0	0	0	0	5.17928	6.77291	7.96813	0	0	0	0	1.19522	0	11.9522	0	0	1.59363	2.78884	0	0	0	0	0
336.151	11736.8	0.606061	0	0.606061	1.51515	0.30303	0	0	6.9697	0.30303	0.30303	1.51515	0	2.42424	0	6.06061	0.30303	0	0	0	0	1.51515	21.5152	0.909091	0	2.42424	0	2.42424	0.909091	0	2.42424	3.63636	7.87879	0	0	0	0	1.51515	0	5.45455	0	0	0	3.63636	1.51515	0	0	0	0
340.295	9925.65	0	0	0.797872	3.7234	0	0	0	3.19149	0	0	0	0	0.265957	0	0	0	0.797872	0	0	0	1.8617	31.6489	0.265957	0	1.06383	0.265957	3.19149	0.265957	0	0.797872	5.05319	7.97872	0	0	0.531915	0	0.265957	0	2.92553	0	0	0.797872	2.39362	1.32979	0.265957	0	0	0
341.442	2652.33	0	1.19048	1.98413	3.1746	0	0	0	3.96825	0	0.396825	0	0	0.793651	0	0.396825	0.793651	0	0	0.793651	0	0	17.0635	0	0	3.1746	0	0	0	0	5.15873	7.14286	8.33333	0	0	0	0	0	0	3.1746	0	0	3.96825	1.5873	5.15873	0	0	0	0
344.44	5688.07	0	0	0.611621	1.52905	0.30581	0.30581	0.30581	1.22324	0.30581	0	0.917431	0	1.22324	0.30581	1.83486	0	0	0	0	0	0.611621	1.52905	0.917431	0.611621	5.19878	0	0.611621	0.30581	0	0.917431	14.0673	14.0673	0.917431	0.30581	0.30581	0	0.917431	0	3.66972	0.30581	0	2.14067	0.611621	5.50459	0	0	0	0.30581
348.584	7054.41	0	0.475059	0.712589	1.90024	0.23753	0	0	0.712589	0	1.42518	0.950119	0	2.13777	0.23753	3.80048	0.23753	0	0	0	0	0	15.677	0.950119	1.66271	1.90024	0	0	2.3753	0	0.475059	2.85036	7.12589	0	0	0.475059	0.475059	1.18765	0	4.51306	0.23753	0	0.475059	0.23753	2.85036	0	0	0	0
356.735	7306.79	0	0.52356	0.78534	2.09424	0	0	0.26178	6.02094	0	0.52356	0.26178	0	1.57068	0	7.06806	0	0.78534	0	0	0	0.52356	28.2723	0.52356	0.26178	1.3089	0	0	1.04712	0	0.26178	2.09424	5.2356	0.52356	0	0	0.78534	0.52356	0	4.45026	0	0.26178	0.26178	0	2.09424	0	0	0	0
358.917	5369.46	0	0.210084	0.630252	3.15126	0.630252	0	0	2.31092	0.210084	0	1.05042	0	1.47059	0	3.9916	0	0.630252	0	0	0.210084	0.630252	8.61345	0.420168	1.2605	0	0.210084	2.94118	1.05042	0	0.210084	3.36134	11.3445	0.840336	0	0.840336	0.210084	0.630252	0	3.15126	0	0.420168	2.94118	1.47059	1.47059	0	0	0.420168	0.420168
363.062	5986.08	0.241546	0	0	1.44928	0.483092	0	0	3.86473	0.241546	0.724638	0.241546	0	1.20773	0.241546	0.724638	0.483092	0.483092	0	0	0.483092	0.966184	0.966184	0.724638	0.966184	1.44928	0.241546	0.724638	2.17391	0.241546	0.483092	4.10628	5.55556	1.20773	0.483092	0.724638	0	1.20773	0.483092	1.93237	0	0.966184	0.483092	0.483092	5.55556	0.241546	0.483092	0	0.241546
367.151	5109.17	0	0	0.28169	0.84507	0	0	0	3.09859	0.28169	0.56338	0.56338	0	0.56338	0	3.09859	0	0.84507	0	0	0	0.56338	0.56338	0.56338	1.12676	6.19718	0	0	0	0	1.69014	5.35211	3.94366	1.69014	0	0.28169	0.28169	1.40845	0	3.66197	0.28169	0	0	0.28169	0	0.28169	0.28169	0	0.56338
368.947	7037.04	0.25974	0	0	2.07792	0	0	0	3.11688	0	1.03896	0.519481	0.25974	0	0	6.23377	0	1.03896	0	0	0	0.25974	0.779221	0.519481	1.2987	1.2987	0	0	0.25974	0	0	4.15584	1.81818	1.03896	0	2.33766	0.519481	0.779221	0	3.37662	0	0.519481	2.85714	0.25974	0.519481	0	0.25974	0	0.519481
373.091	5666.67	0	0	0	1.9656	0.2457	0	0	1.9656	0	0.982801	0.737101	0.737101	0.2457	0	5.15971	0	1.2285	0	0	0	0.737101	6.38821	1.2285	0.982801	3.6855	0	0.2457	0.2457	0	0.4914	5.89681	3.4398	1.4742	0	0.4914	0.4914	0.4914	0	1.9656	0	0	0.4914	0.2457	0	0	0	0	0
377.236	7161.8	0.391389	0.195695	0.391389	0.978474	0.391389	0	0	2.15264	0.391389	0.978474	0.587084	0	0.391389	0	1.76125	0.195695	0.195695	0	0	0	1.95695	0.978474	0.978474	0.587084	3.7182	0.195695	0	0	0	0	5.67515	4.10959	0	0	1.36986	0	0.782779	0	1.56556	0	0.195695	3.5225	8.21918	0.391389	0.195695	0.195695	0	0
382.43	10169.5	0.27027	0	0	1.89189	0	0	0	1.62162	0	1.08108	0.540541	0	1.08108	0	2.7027	0	0.27027	0	0.27027	0.27027	0.810811	2.97297	0.540541	0	2.7027	0	0.540541	0	0	0.810811	2.97297	0	0	0	0.810811	0	0.540541	0	1.35135	0	0	2.43243	9.72973	0	0	0.540541	0	0.540541
386.574	5111.11	0.253165	0	0	0.253165	0.253165	0	0	1.01266	0	2.27848	0.506329	0	0.253165	0	3.03797	0.253165	0	0	0	0	0.253165	4.81013	0.759494	0	1.77215	0	0	0	0	0	1.01266	1.51899	0.506329	0	0.759494	0	1.26582	0	0.506329	0.253165	0.506329	1.77215	5.31646	0	0	0.759494	0	0.506329
		1.21581	1.21581	10.0917	12.3028	9.49367	2.32558	1.47059	12.3506	2.05011	2.27848	2.04545	2.21239	2.67176	1.55844	7.06806	1.76211	1.77305	1.51976	1.24378	1.10294	3.90456	44.4685	4.04858	5.33808	13.8801	2.08333	5.94059	5.05618	6.38298	11.0024	14.0673	14.0673	2.5974	1.00334	2.33766	3.63636	3.3195	2.26415	11.9522	1.2285	0.966184	9.06977	17.9487	5.55556	1.71149	1.65017	2.14286	1.84697
																2.29687
[truncated: 52 more columns]

## Sheet: log(%>1)
Age (ka)	Acanthodesmia vinculata	Anthocyrtidium zanguebaricum/ophirense	Archipera triclavigera	Arachnocoralium calvata	Arachnocorys castanerides	Amphimelissa setosa	Botryostrobus aquilonaris	Botryostrobus auritus/australis gr.	Botryopyle scatum	Carpocanarium papillosum	Cornutella profunda	Corocalyptra cervus	Cycladophora bicornis	Cycladophora cornuta	Cycladophora davisiana	Eucecryphalus sp.	Eucyrtidium acuminatum	Eucyrtidium anomalus	Eucyrtidium sp.	Lamprocyclas maritalis	Lampromitra erosa	Lithomelissa setosa	Lophophaena hispida	Lophophaena thoracites	Lophophaena spp.	Lophospylis pentagona	Phormacantha hystrix	Phormospyris stabilis	Phormospyris stabilis capoi	Plectacantha oikiskos	Pseudocubus obeliscus	Pseudodictyophimus gracilipes	Pterocanium praetextum	Pterocanium trilobum	Pterocorys claudas	Stichocorys seriata	Zygocircus productus	Verticillata hexacantha	Acanthosphaera circospora	Acrosphaera lappacea/spinosa	Actinomma boreale	Actinomma leptodermum	Actinomma medianum	Actinomma popofskii	Anomalacantha dentata	Cenosphaera reticulata	Dictyocoryne profunda	Didymocyrtis tetrathalamus	Druppatractus irregularis
0.789403	0.30072	0.196069	0.433264	0.685889	0.61683	0	0	0.268559	0.233825	0.196069	0.154716	0	0.268559	0.109007	0	0.330663	0.30072	0.154716	0	0	0.601595	0.569422	0.672928	0.455529	0.645784	0	0	0.154716	0.0579145	0.433264	0.698474	0.569422	0.109007	0.109007	0.358673	0.268559	0.496902	0.358673	0	0	0.154716	0.601595	0.0579145	0	0.109007	0	0.0579145	0.330663	0.154716
1.51741	0	0	0.761884	0.788667	0.702785	0	0	0.3928	0	0.322827	0.322827	0	0	0	0.135974	0.239373	0.239373	0.239373	0	0.322827	0	0	0.239373	0.505948	0.553097	0	0	0.322827	0.135974	0.135974	0.3928	0.3928	0	0	0.239373	0.135974	0.322827	0	0	0.239373	0.135974	0.3928	0	0	0	0	0	0.322827	0
3.42074	0.194802	0.0750647	0.487912	0.784927	0.69568	0	0	0.399576	0.194802	0.0750647	0.139047	0.139047	0.399576	0	0.0750647	0.194802	0.194802	0.328803	0	0	0.561281	0.538175	0.58322	0.487912	0.64308	0.328803	0	0.244207	0	0.43106	0.771268	0.64308	0.194802	0	0.399576	0.43106	0.561281	0.51377	0.0750647	0	0	0.328803	0	0	0.194802	0	0.194802	0.244207	0.139047
6.05209	0.228288	0.228288	0.377147	0.745412	0.649122	0	0	0.262422	0.294067	0.106063	0.262422	0.191241	0.467812	0	0	0.0562615	0.294067	0.150737	0	0.106063	0.55966	0.323562	0.6213	0.487801	0.69993	0.150737	0	0.228288	0	0.591573	0.841825	0.401648	0.377147	0	0.377147	0.467812	0.635434	0.467812	0.191241	0.0562615	0.35118	0.606691	0	0	0.0562615	0	0	0.467812	0.0562615
6.78009	0.232798	0	0.690259	0.824371	0.314674	0	0	0.442958	0.383535	0	0.131814	0	0.131814	0	0.232798	0	0.442958	0	0	0	0.314674	0.232798	0.495219	0.383535	0.748957	0	0	0.232798	0.868232	0.131814	0	0	0.383535	0	0	0	0.495219	0	0	0	0.314674	0.541862	0	0	0	0	0.131814	0.131814	0.495219
7.48178	0.345532	0.345532	0.281455	0.885753	0.281455	0	0	0.720599	0.115261	0	0.115261	0	0.495219	0	0	0	0	0.401359	0.115261	0.115261	0.45082	0.281455	0.401359	0.281455	0.918808	0	0.281455	0.345532	0	0.495219	0.720599	0.495219	0.281455	0	0.281455	0.20626	0.20626	0	0	0	0.345532	0.45082	0	0	0	0	0	0.345532	0.20626
8.73606	0.0693019	0.181567	0.57613	0.848519	0.766732	0	0	0.377321	0.0693019	0.181567	0.228411	0.129052	0.407747	0.0693019	0.228411	0.344603	0	0.0693019	0.129052	0	0.595626	0.665883	0.270691	0.270691	0.766732	0.181567	0	0.129052	0	0.632173	1.14538	0.82668	0.0693019	0	0.344603	0.407747	0.377321	0.511768	0	0.0693019	0.228411	0.534298	0	0.129052	0.129052	0	0.0693019	0.270691	0.181567
10.1658	0.140407	0.140407	0.463654	0.646905	0.874398	0	0	0.682758	0.140407	0	0.402557	0	0.564874	0	0.246341	0.402557	0.140407	0	0	0	0.517206	0.517206	0.140407	0.402557	0.80233	0	0.402557	0	0	0.80233	0.874398	0.80233	0.140407	0	0.463654	0	0.140407	0	0	0.140407	0.140407	0.463654	0	0	0	0	0	0.246341	0.140407
11.3674	0.220411	0.0664337	0.49814	0.737416	0.862191	0	0.174893	0.59936	0	0.124041	0.174893	0.299232	0.299232	0.124041	0.124041	0.174893	0.299232	0	0.124041	0.0664337	0.650412	0.474722	0.174893	0.696089	0.724073	0.124041	0	0.220411	0	0.59936	0.831558	0.809866	0.124041	0.0664337	0.261607	0.395781	0.449969	0.174893	0	0.0664337	0.520359	0.474722	0.0664337	0.124041	0	0	0	0	0
13.9987	0.0855991	0.157073	0.924662	0.710915	0.90155	0	0	0	0	0	0.157073	0.27218	0.27218	0.0855991	0	0.0855991	0.218429	0	0.218429	0	0.531033	1.48304	0.0855991	0.651844	0.607467	0	0	0	0	0.218429	1.02473	0.630222	0.157073	0.0855991	0.157073	0.27218	0.320006	0.157073	0	0	0.0855991	0.218429	0	0.0855991	0.0855991	0	0	0	0.218429
14.7267	0	0.255273	0	0.531479	0.69897	0	0.146128	0.69897	0	0	0.146128	0	0.342423	0	0	0.342423	0	0	0	0	0	1.58206	0.255273	0.414973	0.531479	0	0	0.146128	0	0.579784	0.255273	0.69897	0.146128	0	0	0	0	0	0	0.255273	0.255273	0.255273	0	0	0	0	0	0	0.531479
17.823	0.152882	0	0.492719	0.596991	1.02093	0	0	0.429391	0	0	0	0.212963	0.39389	0	0.212963	0.152882	0	0	0.0831336	0	0.39389	1.65613	0.152882	0.265733	0.596991	0	0	0	0	0.212963	0.767328	0.429391	0	0	0.265733	0.212963	0	0.152882	0	0	0.212963	0.312781	0	0	0.265733	0	0	0.0831336	0
20.4543	0.0759864	0	0.196898	0.628438	0.628438	0	0	0.140637	0	0.196898	0.2467	0	0.2467	0	0.434703	0	0.368925	0	0.140637	0.140637	0.517784	1.60419	0.2467	0.761936	0.331878	0	0	0	0	0.291374	0.647548	0.665852	0.2467	0	0.331878	0.291374	0.140637	0	0	0.0759864	0	0.403058	0.0759864	0	0.331878	0	0.291374	0.0759864	0.140637
23.0856	0	0	0.276388	0.789591	0.623544	0	0	0	0.0711217	0.233439	0.185771	0.132219	0.384441	0.0711217	0.31547	0	0.185771	0.0711217	0.233439	0	0.415211	1.21225	0.185771	0.801958	0.585119	0.351323	0	0	0	0.443945	0.889949	0.889949	0.276388	0	0.233439	0.384441	0.276388	0.185771	0	0	0.443945	0.443945	0	0	0	0	0	0.185771	0
25.717	0	0	0.187673	0.841731	0	0	0	0	0	0.257873	0.187673	0	0.103896	0	0.257873	0.103896	0.187673	0	0.103896	0	0.257873	1.472	0	0.257873	0.747769	0	0.257873	0.41857	0	0	0.824495	0.747769	0	0.257873	0.187673	0.41857	0.103896	0.187673	0	0.103896	0.70364	0.627698	0.187673	0	0.103896	0	0	0.318289	0
28.7167	0.15207	0	0.392258	0.79526	0	0	0	0	0	0	0.264481	0	0.519313	0	0.0826574	0	0.211903	0	0.15207	0	0.427673	1.38881	0.311376	0.353697	0.823499	0	0.211903	0.15207	0	0	0.765058	0.765058	0.264481	0	0.264481	0.311376	0.15207	0	0.15207	0.15207	0.638918	0.79526	0.0826574	0	0.0826574	0	0	0.0826574	0
31.3481	0.210333	0	0.286587	0.703278	0.457755	0	0	0	0.210333	0	0.210333	0	0.543101	0	0.286587	0.210333	0.210333	0	0	0	0.35143	1.08689	0	0	0.753805	0	0	0.407838	0	0	0.543101	0.286587	0.117777	0	0.35143	0.543101	0.286587	0	0	0.210333	0.35143	0.703278	0.210333	0	0.210333	0	0.35143	0.35143	0.210333
32.1375	0	0	0.301756	0.301756	0.125302	0	0	0.336574	0.0671542	0.125302	0.222429	0.176575	0.478089	0	0.125302	0	0.222429	0	0	0.0671542	0.426876	1.47122	0.125302	0	0.523894	0	0.222429	0.336574	0	0	0.866554	0.263901	0	0.301756	0.125302	0.301756	0.478089	0.222429	0.0671542	0.176575	0.0671542	0.70013	0	0.0671542	0.0671542	0.0671542	0	0.125302	0.301756
34.7688	0	0.0818759	0.150737	0.487801	0.424841	0	0.0818759	0	0.0818759	0.35118	0.38957	0.35118	0.0818759	0	0.21016	0.0818759	0.21016	0	0.150737	0.21016	0.424841	0.833092	0.0818759	0.516159	0.76131	0.150737	0.614057	0.262422	0	0	0.791461	0.776647	0.35118	0	0.309064	0.635434	0.516159	0	0.150737	0	0.655808	0.846127	0.0818759	0	0.21016	0	0	0.21016	0
37.2894	0	0.227391	0.452532	0.48632	0.415892	0	0.163971	0	0	0	0.227391	0.0896783	0.375873	0	0.0896783	0.0896783	0.0896783	0	0.28272	0	0.331789	1.50152	0.227391	0.28272	0.48632	0.163971	0.546905	0.375873	0	0	0.600063	0.690115	0.227391	0	0.375873	0.227391	0.546905	0	0	0.0896783	0.452532	0.375873	0	0.0896783	0.0896783	0	0	0.0896783	0
39.7511	0.0790367	0	0.0790367	0.379705	0.0790367	0	0.14588	0.254887	0.0790367	0	0.14588	0	0.300596	0.0790367	0.14588	0	0.300596	0	0.14588	0	0.555676	1.52807	0.4466	0.530867	0.41444	0.41444	0.555676	0.14588	0	0	0.805448	0.76271	0.0790367	0	0.254887	0.4466	0.203795	0.0790367	0.0790367	0	0.476543	0.555676	0.14588	0.0790367	0.14588	0	0	0.14588	0.300596
42.2129	0	0	0.308606	0.728177	0.308606	0	0.150474	0.308606	0	0.209815	0	0	0.350681	0	0.0817214	0.150474	0.209815	0	0.0817214	0	0.42428	1.65016	0.150474	0	0.515534	0	0	0.150474	0	0	0.728177	0.542137	0.262014	0	0.150474	0.42428	0.308606	0	0	0.0817214	0.0817214	0.308606	0.150474	0	0.262014	0.150474	0	0.0817214	0.150474
44.6911	0	0.127525	0.127525	0.571753	0.341343	0	0.0684265	0.267932	0	0.179536	0	0	0.267932	0.127525	0.127525	0.127525	0.225979	0	0	0	0	1.48944	0	0.507644	0.627604	0.373866	0.179536	0.373866	0	0	0.963369	0.707192	0.225979	0	0.483984	0.507644	0.341343	0.225979	0	0.225979	0.341343	0.507644	0	0	0	0	0	0.267932	0
47.1529	0.28464	0.229027	0.0904279	0.83168	0.455127	0	0.28464	0	0	0	0.0904279	0	0.229027	0	0	0	0.165233	0	0	0.0904279	0.48902	1.30563	0.28464	0.48902	0.650523	0.48902	0.650523	0	0	0	0.71321	0.455127	0	0	0.48902	0.48902	0.520459	0.418363	0	0	0.0904279	0.229027	0.0904279	0	0.0904279	0.165233	0.0904279	0.455127	0
49.6147	0	0	0.157939	0.560095	0.58556	0	0	0.440025	0.0861099	0.157939	0.321493	0.403993	0.364699	0.0861099	0	0	0.0861099	0	0	0	0.440025	1.51294	0.321493	0.0861099	0.674684	0.321493	0.157939	0	0	0	0.81174	0.731264	0.219557	0	0.157939	0.504197	0.364699	0.157939	0.0861099	0	0.321493	0.219557	0.403993	0	0.0861099	0.157939	0.0861099	0	0.219557
52.0765	0.130814	0.231212	0	0.717498	0.231212	0	0	0	0.130814	0.130814	0.348349	0.231212	0.231212	0.0703139	0	0	0.381291	0	0	0	0.492616	1.3337	0.312702	0.183908	0.785092	0.273865	0.41191	0	0	0	1.04896	0.923315	0.273865	0	0.183908	0.41191	0.312702	0.0703139	0.130814	0.0703139	0.0703139	0.130814	0.273865	0	0.130814	0	0.231212	0.231212	0.312702
54.5383	0.206426	0	0.383794	0.897437	0	0	0.0802078	0.418752	0.0802078	0	0.147886	0	0	0.0802078	0.147886	0	0.0802078	0	0	0	0.418752	1.25129	0.345773	0.53581	0.560733	0	0.584304	0.258005	0.0802078	0	1.09905	0.929678	0	0	0.206426	0.258005	0.345773	0.0802078	0	0.0802078	0.0802078	0	0.206426	0	0	0	0	0.258005	0.481213
57.0821	0.14738	0.0799118	0.0799118	0.646829	0.480036	0	0.0799118	0.303218	0	0	0.417665	0.257218	0.449969	0	0.205762	0	0.0799118	0	0	0	0.626579	0.605338	0.14738	0.382763	0.666177	0	0.719532	0.382763	0	0	0.948354	0.861094	0.14738	0	0.382763	0.666177	0.14738	0.205762	0.205762	0	0.303218	0.417665	0.0799118	0.14738	0	0	0.0799118	0.257218	0.382763
58.1489	0	0.156501	0	0.862768	0.401131	0	0.0852619	0.500949	0.156501	0	0.217684	0	0.217684	0	0.0852619	0.217684	0.271302	0	0.271302	0	0.6906	0.650377	0.437014	0.556669	0.727411	0.0852619	0.529702	0.217684	0	0	1.04903	0.792817	0	0	0	0.437014	0.319022	0.319022	0	0	0	0.319022	0	0	0.217684	0	0	0.0852619	0.271302
60.6106	0	0.0797646	0	0.47945	0.0797646	0	0.147128	0.147128	0.147128	0.205431	0.147128	0.0797646	0.0797646	0.147128	0	0.147128	0	0	0.205431	0	0.38225	1.60546	0.147128	0.302778	0.62591	0	0.751055	0	0	0	0.735238	0.684005	0	0	0.205431	0.38225	0	0	0	0	0.0797646	0.0797646	0.417123	0	0	0	0.0797646	0.147128	0.417123
63.5812	0	0	0.345773	0.53581	0.383794	0	0.0802078	0.481213	0.0802078	0.206426	0.383794	0	0.451104	0	0	0	0.258005	0	0	0	0.0802078	1.09198	0.383794	0.383794	0.627922	0	0.206426	0	0.147886	0.383794	0.753224	0.648192	0.383794	0	0.304102	0.60666	0.509369	0	0	0.147886	0.206426	0.258005	0.258005	0.0802078	0	0.0802078	0	0.383794	0
66.043	0	0	0.358325	0.55195	0.268274	0	0.0841025	0	0	0.154531	0.215115	0	0.31563	0	0.154531	0	0.215115	0	0	0	0.31563	1.39675	0.358325	0.55195	0.739349	0	0.5251	0.154531	0	0.432873	0.869833	0.577236	0.215115	0.0841025	0.215115	0.397197	0.5251	0	0	0	0.154531	0.0841025	0	0	0	0	0.0841025	0.215115	0.0841025
68.5048	0.245269	0.0754569	0.245269	0.729515	0.195695	0	0	0.195695	0.139724	0.28976	0.245269	0	0.330113	0	0.28976	0	0	0	0	0.0754569	0.139724	1.48304	0.28976	0.330113	0.837737	0	0.195695	0.0754569	0	0.28976	0.644986	0.605957	0.0754569	0.139724	0.28976	0.40106	0.367034	0.0754569	0	0	0	0.139724	0.28976	0	0	0	0	0.367034	0.245269
71.3445	0	0.0635136	0.118913	0.82408	0.853804	0	0	0.565513	0.118913	0.252222	0.212167	0.118913	0.252222	0.0635136	0.212167	0.118913	0.168038	0	0	0	0.118913	1.29535	0.322708	0.505791	0.881623	0	0.0635136	0.322708	0	0.745616	0.707101	0.460862	0.252222	0	0.252222	0.526624	0.288893	0.168038	0	0.118913	0	0.0635136	0.212167	0	0	0	0.0635136	0.354078	0.288893
75.5526	0	0	0.15207	0.952621	0.765058	0	0	0.353697	0.0826574	0.211903	0.15207	0.264481	0.264481	0.264481	0.264481	0.211903	0	0	0	0	0.15207	0.991449	0.427673	0.392258	0.638918	0	0	0.0826574	0	0.898629	0.862686	0.594946	0.264481	0	0.311376	0.311376	0.427673	0	0.0826574	0.0826574	0.0826574	0	0.311376	0	0	0	0.15207	0.427673	0.211903
78.5161	0.123155	0.0659285	0.363889	0.734498	0.828512	0	0.173712	0.393647	0	0.0659285	0.259993	0.123155	0.517866	0.0659285	0.0659285	0.123155	0.173712	0	0	0	0.393647	0.849147	0.596687	0.363889	0.795595	0.123155	0.259993	0.123155	0	0.331941	0.559062	0.678563	0.123155	0	0.495704	0.421496	0.297456	0	0.0659285	0	0.173712	0.123155	0.123155	0	0	0	0.123155	0.297456	0.123155
80.6103	0.207011	0.163762	0.346622	0.734598	0.878802	0	0	0.282402	0.0617057	0.163762	0.207011	0	0.452103	0	0	0.282402	0.375489	0	0	0	0.55575	0.928443	0.452103	0.282402	0.62388	0	0.0617057	0.115725	0	0.758369	0.812658	0.55575	0.115725	0	0.402557	0.474905	0.517206	0.163762	0.207011	0.207011	0.207011	0.207011	0.246341	0	0	0	0.207011	0.282402	0.207011
82.0921	0.2236	0	0.177551	0.400564	0.702465	0	0	0.455127	0.067573	0.126034	0.067573	0.067573	0.338148	0	0.126034	0.2236	0.2236	0	0	0	0.428702	1.30518	0.400564	0.503594	0.756925	0	0.126034	0.067573	0	0.67244	0.586807	0.455127	0.2236	0	0.265231	0.370476	0.177551	0.067573	0	0	0.303218	0.428702	0.656611	0	0	0	0.177551	0.338148	0
85.0555	0.137056	0	0.285027	0.555989	0.618465	0	0	0.361483	0	0.192173	0.192173	0.137056	0.426472	0.137056	0.45565	0	0.192173	0	0	0	0.361483	0.637441	0.361483	0.361483	0.915696	0	0.324935	0.395192	0	0.637441	0.765203	0.395192	0.285027	0	0.192173	0.395192	0.137056	0.137056	0	0.0739121	0.45565	0.555989	0.361483	0.0739121	0.137056	0	0.0739121	0.426472	0.192173
94.1436	0.138155	0.138155	0.327072	0.693075	0.535858	0	0	0.327072	0.193625	0.286979	0.242806	0.074548	0.363774	0.074548	0	0.074548	0.242806	0	0	0	0.429008	0.999512	0.429008	0.535858	0.58081	0.242806	0.429008	0.782199	0	0.193625	0.458284	0.64056	0.193625	0	0.138155	0.485711	0.242806	0	0	0.286979	0.535858	0.724859	0.286979	0	0	0	0.327072	0.363774	0.363774
97.1071	0.173243	0	0.173243	0.537942	0.537942	0	0	0.646538	0	0.173243	0.173243	0.173243	0.296751	0	0.173243	0.296751	0.173243	0	0	0	0.595626	0.946606	0.296751	0	0.595626	0	0	0.3928	0	0.471407	0.3928	0.471407	0.296751	0	0	0.173243	0.296751	0	0.173243	0	0.173243	0.471407	0.296751	0	0	0	0	0.296751	0
102.461	0.125302	0.125302	0.670147	0.825142	0.222429	0	0	0.426876	0.176575	0.263901	0.222429	0.0671542	0.0671542	0.0671542	0.0671542	0.125302	0.222429	0	0	0	0.125302	0.963504	0.398811	0.603148	0.301756	0	0.0671542	0.523894	0	0.728177	0.791266	0.70013	0.368806	0	0.301756	0.222429	0.501595	0	0	0.125302	0.0671542	0.368806	0.222429	0	0	0	0.263901	0.301756	0.263901
105.425	0.0762539	0	0.404065	0.777456	0.791153	0	0	0.369878	0.247422	0.0762539	0.0762539	0.292188	0.247422	0.0762539	0.0762539	0.292188	0.197505	0	0	0	0.369878	0.609703	0.369878	0.492945	0.492945	0.369878	0.332768	0.141098	0	0.141098	0.748694	0.404065	0.197505	0	0.404065	0.292188	0.435756	0.141098	0	0.197505	0.292188	0.648837	0	0	0	0	0	0.247422	0.141098
108.419	0	0	0.649355	0.711997	0.815334	0	0	0.309217	0.129052	0.129052	0.129052	0.181567	0.344603	0.129052	0.181567	0.129052	0.270691	0	0.0693019	0	0.377321	0.848519	0.270691	0.0693019	0.837737	0.181567	0.270691	0.377321	0	0.436179	0.407747	0.57613	0.181567	0	0.228411	0.462864	0.436179	0	0.0693019	0	0.815334	0.968693	0.436179	0.129052	0	0	0	0.488004	0.228411
111.969	0	0	0.267138	0.657159	0.383174	0	0	0.474654	0.153793	0.153793	0.267138	0.19495	0.383174	0.108323	0.153793	0	0.19495	0	0	0	0.407913	1.32746	0.267138	0.299181	0.804986	0.299181	0.0575303	0.0575303	0	0.267138	0.629184	0.532491	0.19495	0	0.32902	0.356941	0.514055	0	0	0.108323	0.356941	0.892032	0	0	0	0	0.108323	0.32902	0.299181
115.519	0.201675	0.0485208	0.526865	0.739709	0.478488	0	0	0.424039	0.168148	0.314674	0.201675	0.261839	0.261839	0.131814	0.168148	0.131814	0	0	0	0	0.424039	0.634446	0.289059	0.383535	0.668787	0.338861	0.131814	0.232798	0	0.361772	0.461086	0.442958	0	0	0	0.289059	0.495219	0.0921613	0.201675	0	0.314674	0.70061	0	0.0921613	0	0	0.261839	0.51133	0.261839
119.14	0.0496309	0.237139	0.320061	0.604942	0.467911	0	0	0.389659	0.367676	0.17151	0.205563	0.17151	0.237139	0	0.0941673	0.17151	0.0496309	0	0	0	0.389659	0.44963	0.518546	0.266574	0.840871	0.205563	0.266574	0.0941673	0	0.367676	0.748226	0.367676	0.320061	0	0.389659	0.237139	0.410583	0.237139	0.0941673	0.0941673	0.205563	0.654263	0	0.0941673	0	0	0.17151	0.205563	0.17151
120.122	0.156216	0.156216	0.270865	0.649647	0	0	0	0.500305	0	0	0.156216	0	0.436417	0	0	0.361483	0.436417	0	0	0	0.361483	0.156216	0.361483	0.361483	0.605338	0.156216	0	0.361483	0	0.649647	0.760566	0.361483	0.555989	0	0.361483	0.361483	0.436417	0	0	0.156216	0.436417	0.156216	0	0	0	0	0.156216	0.270865	0
122.689	0.161807	0.0883961	0.279424	0.569234	0.161807	0	0	0.481672	0.161807	0.0883961	0.328108	0.371881	0.0883961	0	0.161807	0.411643	0.0883961	0	0	0	0.411643	0.684618	0.411643	0.161807	0.642069	0.0883961	0.371881	0.224585	0	0.0883961	0.836898	0.642069	0.161807	0	0.279424	0.279424	0.328108	0.161807	0	0.0883961	0.0883961	0.619122	0	0.161807	0	0	0.161807	0.279424	0.279424
126.239	0.261607	0.150211	0.30815	0.727447	0.261607	0	0	0.541497	0.0815675	0	0.261607	0.209471	0.209471	0	0	0.150211	0.0815675	0	0	0	0.388506	0.915474	0.209471	0.42372	1.05425	0.0815675	0.77515	0.261607	0	0.388506	0.92624	0.915474	0.30815	0	0.30815	0.486589	0.42372	0.0815675	0.30815	0	0.612696	0.654407	0	0	0	0	0	0.150211	0.0815675
129.789	0.295353	0	0.361483	0.51491	0.628057	0	0	0	0	0.295353	0.295353	0.122109	0.418861	0.122109	0.217313	0.295353	0	0	0	0	0.469535	0.893106	0.593516	0	0.910777	0	0.295353	0.217313	0	0	0.768648	0.83532	0.217313	0.122109	0.217313	0.418861	0.418861	0	0	0	0.418861	0.893106	0	0	0	0.217313	0.217313	0.122109	0.217313
130.499	0	0	0.298875	0.841397	0.749772	0	0	0.519858	0	0	0	0	0.220125	0	0	0	0	0	0	0	0.123862	0.841397	0.298875	0	0.996113	0	0.841397	0.298875	0	0.423273	0.665615	0.950403	0	0	0.220125	0.598823	0.298875	0	0	0	0.598823	0.861572	0	0	0.423273	0	0.123862	0	0.519858
134.049	0	0	0.46131	1.12394	0.618527	0	0	0.650311	0	0	0.119077	0	0.212431	0	0	0.119077	0.119077	0.119077	0	0	0.212431	0.707651	0.212431	0.546994	1.17261	0	0.46131	0	0	0	0.411163	1.05729	0	0	0.119077	0.411163	0.119077	0.119077	0	0	0.46131	0.844706	0.119077	0	0	0	0.119077	0	0
137.599	0	0	0	0.65804	0.33914	0	0	0.443286	0	0	0.33914	0	0.33914	0	0.597539	0	0.201866	0	0	0	0.275904	1.16463	0.201866	0.527226	0.939135	0	0.839928	0.201866	0	0.201866	0.597539	0.628842	0	0	0.275904	0.527226	0	0.112557	0.275904	0	0.527226	0.967736	0	0.201866	0.201866	0.201866	0	0.275904	0.33914
141.148	0	0.200443	0.200443	0.594674	0.594674	0	0	0.274104	0	0	0	0.111684	0.111684	0	0.274104	0	0	0	0	0	0.274104	1.56903	0.111684	0.274104	0.682354	0.111684	0.524531	0	0	0.484696	0.337064	0.524531	0	0	0.200443	0.274104	0	0	0	0	0.561017	1.05169	0	0	0.200443	0.274104	0	0.200443	0.200443
144.698	0.197201	0.109699	0	0.197201	0.700962	0	0	0.386817	0	0	0.109699	0	0.109699	0	0.109699	0.197201	0.109699	0	0	0	0.478782	1.09671	0.269996	0.269996	0.648192	0	0.332322	0.109699	0	0.675378	0.386817	0.675378	0.269996	0	0	0.588111	0.197201	0	0	0	0.725123	1.27453	0	0.109699	0.269996	0	0.109699	0	0.386817
147.964	0	0	0.616159	0.977775	0.788551	0	0	0.445559	0	0.160597	0.223013	0.160597	0.0876798	0	0.160597	0	0.0876798	0	0	0	0	1.4233	0.326042	0.639058	0.923376	0	0.326042	0.160597	0	0.369639	0.701296	0.510161	0	0	0.223013	0.326042	0	0	0	0	0.160597	0.80408	0	0	0.223013	0.223013	0	0.0876798	0.369639
149.123	0.229854	0	0.490383	0.862076	0.652089	0	0	0.521868	0	0	0	0	0.165872	0.0908074	0.335014	0	0	0	0	0	0	1.27662	0	0.335014	0.818318	0	0.335014	0.165872	0	0	0.875734	0.628983	0	0	0.28561	0.28561	0	0	0	0	0.335014	0.604578	0.0908074	0.0908074	0.335014	0	0	0	0.604578
152.673	0.0952035	0	0.621828	1.04332	0.805647	0	0	0	0	0	0.0952035	0	0.43388	0	0	0	0	0	0	0	0	0.788667	0.347426	0.296751	1.02362	0	0.347426	0	0	0	0.992268	0.567741	0.0952035	0	0	0.296751	0	0.173243	0	0	0.0952035	0.621828	0.0952035	0.0952035	0.347426	0	0.0952035	0	0.805647
156.321	0	0	0.470157	0.582058	0.271302	0	0	0.217684	0	0	0.271302	0	0.156501	0	0.556669	0.217684	0	0	0	0	0	1.65771	0.217684	0.0852619	0.606045	0	0.362014	0.271302	0	0	0.628777	0.628777	0	0	0	0.217684	0.0852619	0	0	0	0.319022	0.500949	0.0852619	0	0.271302	0.217684	0	0	0.156501
159.168	0	0	1.045	0.690115	0.331789	0	0	0.48632	0	0	0.0896783	0	0.331789	0	0.28272	0.227391	0	0	0	0	0	0.79763	0.227391	0	1.03593	0.227391	0.28272	0.0896783	0	0	0.764663	0.624386	0.163971	0	0.163971	0.331789	0	0	0	0	0.28272	0.79763	0.0896783	0.163971	0.227391	0.48632	0	0.163971	0.574297
162.015	0.168478	0	0.339418	0.610721	0.461759	0	0	0.584738	0	0	0.168478	0	0	0	0	0	0.233225	0	0	0	0.289559	0.882813	0.339418	0	1.03952	0	0.42468	0.233225	0	0.461759	1.14716	0.74055	0	0	0.233225	0.384138	0.233225	0	0	0	0.527587	0.854982	0	0.168478	0.0923581	0.461759	0	0	0.610721
164.767	0	0.174656	0.0960492	0.625088	0.540986	0	0	0.673286	0	0	0.174656	0	0.298875	0	0.174656	0	0.0960492	0	0	0	0	0.625088	0.0960492	0.0960492	0.625088	0	0.625088	0.0960492	0	0.395352	0.856615	0.792253	0.241191	0	0.0960492	0.349787	0.174656	0	0.298875	0	0.673286	0.88554	0.0960492	0	0.241191	0.241191	0.174656	0	0.298875
167.67	0.0956245	0	0.173947	0.714932	0.648192	0	0	0.59722	0	0.240279	0	0	0.297809	0	0.883675	0	0.173947	0	0.297809	0	0.348602	0.648192	0.472821	0.435229	0.923719	0.0956245	0.623453	0	0	0.435229	0.85477	0.623453	0.297809	0	0.0956245	0.507417	0	0	0	0	0.507417	0.823802	0	0.240279	0.0956245	0.173947	0	0	0.240279
170.517	0	0.0781807	0.501008	0.597539	0.694146	0	0	0.597539	0	0	0.252599	0	0.298022	0	0.694146	0	0	0	0	0	0	1.40917	0.0781807	0.144411	0.575343	0	0.443286	0.144411	0	0.694146	0.743234	0.252599	0	0	0.252599	0	0	0	0	0	0.473105	0.967736	0.0781807	0.0781807	0	0.144411	0	0.0781807	0.201866
172.813	0.0821868	0	0.458638	0.569179	0.695336	0	0	0.615424	0.0821868	0.210853	0.210853	0.151268	0.263241	0	0.695336	0.151268	0	0	0	0	0	0.544068	0.352183	0.210853	0.860338	0	0.425969	0.151268	0	0.676694	0.929419	0.676694	0.309985	0	0	0.592917	0.48902	0	0.0821868	0.0821868	0.730378	0.950203	0	0	0.0821868	0	0	0.0821868	0.151268
175.66	0.162727	0	0.225779	0.597097	0.571391	0	0	0.621365	0.0889411	0.225779	0.483652	0	0.373581	0	0.794298	0.162727	0.0889411	0	0	0	0.162727	0.51491	0.329675	0.280827	0.644349	0	0.544068	0	0	0.571391	0.962929	0.743937	0.162727	0	0.162727	0.413452	0	0	0	0.0889411	0.329675	0.962929	0	0.162727	0.162727	0.162727	0	0.162727	0.373581
178.526	0	0	0	0.63768	0.24827	0	0	0.180166	0	0.24827	0	0.180166	0.180166	0	0.307127	0.180166	0	0	0	0	0	1.60565	0.24827	0.0993593	0.988575	0.0993593	0	0.180166	0	0.180166	0.806075	0.0993593	0	0	0	0.180166	0	0	0.307127	0	0.405247	1.05242	0	0	0.307127	0	0.24827	0	0
180.518	0.0909984	0	0	0.335558	0	0	0	0.695718	0	0	0.0909984	0.23027	0.166193	0	0.379958	0	0.166193	0	0	0.0909984	0.166193	0.695718	0.0909984	0	0.75297	0	0.457095	0.23027	0	0.286097	0.876611	0.379958	0.166193	0	0.0909984	0.335558	0	0	0.335558	0	0.950628	1.27758	0	0.0909984	0.166193	0	0.0909984	0	0.379958
182.17	0.0908074	0.0908074	0.165872	0.521868	0.165872	0	0	0.456437	0	0	0	0.165872	0.335014	0.0908074	0.521868	0	0.28561	0	0	0	0.165872	0.379369	0	0	1.03211	0	0	0	0	0.41961	0.992872	0.578719	0.41961	0	0	0.229854	0	0	0.28561	0	1.00302	1.08503	0	0.0908074	0.0908074	0.490383	0.165872	0.165872	0
185.035	0	0	0	0.514225	0.48299	0	0	0.665404	0	0.0887587	0.280357	0.162419	0.329151	0	0.22538	0	0.373012	0	0	0	0.162419	0.48299	0.0887587	0.22538	0.98303	0.0887587	0.48299	0.280357	0	0.162419	1.15772	0.48299	0.162419	0.162419	0.0887587	0.543364	0.162419	0	0.0887587	0	0.643587	1.00304	0.0887587	0.0887587	0.0887587	0.22538	0	0.162419	0
187.882	0.0954136	0	0.173594	0.806547	0.734208	0	0	0.434553	0	0.297279	0.0954136	0.0954136	0.297279	0	0.771882	0	0.0954136	0	0.173594	0	0.239825	0.348013	0	0	0.753453	0.0954136	0.297279	0	0	0.173594	1.13914	0.5387	0	0.0954136	0.0954136	0.348013	0.173594	0	0.348013	0	0.5387	1.02458	0	0	0	0	0	0	0.239825
190.729	0.0783221	0.144654	0	0.552567	0.339605	0	0	0.639455	0.144654	0.202185	0.0783221	0.252978	0.411793	0.0783221	0.443835	0.202185	0.339605	0	0	0	0.252978	0.0783221	0.0783221	0.144654	0.876318	0	0.377197	0	0	0.202185	0.759145	0.527829	0.252978	0	0.298447	0.202185	0	0.339605	0.202185	0	0.876318	1.05218	0.144654	0.0783221	0.0783221	0.202185	0.144654	0.144654	0.144654
195.682	0.159109	0.0868006	0.221079	0.366877	0.366877	0	0	0.475838	0.0868006	0.323499	0.0868006	0.366877	0.0868006	0.0868006	0.475838	0	0.159109	0	0	0	0.275301	0.98355	0.0868006	0.275301	0.857012	0.159109	0.535753	0	0	0.406314	0.535753	0.535753	0.366877	0	0.221079	0.221079	0.275301	0	0.221079	0	0.657039	0.930548	0	0.221079	0.159109	0.0868006	0	0.323499	0.562872
199.203	0.0655298	0.172778	0	0.594569	0.594569	0	0	0.470469	0.21787	0.0655298	0.258717	0	0.391958	0	0.122456	0.258717	0.419735	0	0.0655298	0	0.362281	0.594569	0.576195	0.122456	0.536937	0	0.362281	0.0655298	0	0.515891	0.757633	0.536937	0.122456	0	0.21787	0.362281	0.362281	0	0	0	0.536937	0.937253	0	0.21787	0.0655298	0	0.29605	0.29605	0
202.724	0	0	0	0.540515	0.563671	0	0	0.401558	0.0755886	0	0.195994	0.0755886	0.516055	0.0755886	0.462569	0.0755886	0.0755886	0	0	0	0.516055	0.759883	0.245625	0.0755886	0.861759	0	0	0	0	0.433134	0.490135	0.139951	0.290162	0	0.290162	0.290162	0.245625	0	0	0.0755886	0.774003	0.962602	0	0.0755886	0.0755886	0	0.0755886	0.139951	0.290162
206.245	0.131013	0	0.348771	0.561202	0.184171	0	0	0.440998	0.231527	0	0.184171	0.274223	0.313095	0	0.131013	0.131013	0	0	0	0	0.0704281	0.895765	0.440998	0.313095	0.950488	0.131013	0.184171	0	0	0	0.467848	0.231527	0.231527	0.0704281	0.348771	0.0704281	0.0704281	0.0704281	0	0	0.467848	0.773024	0.0704281	0.274223	0.0704281	0	0.313095	0.348771	0
211.362	0	0	0	0.320748	0.320748	0	0	0	0.189335	0.320748	0	0	0	0	0.421496	0	0	0	0	0	0	0	0.189335	0.421496	0.730102	0	0	0	0	0	0	0.189335	0	0	0	0.189335	0	0	0	0.189335	0.503217	0.503217	0	0.189335	0	0	0.189335	0.320748	0.320748
214.882	0.0597499	0	0.0597499	0.627861	0.30802	0	0.0597499	0.464997	0.30802	0	0.239916	0	0.275301	0.201389	0.112265	0	0.393562	0	0	0	0.393562	0.239916	0.506828	0.0597499	0.800011	0	0.239916	0.239916	0	0.418702	0.69743	0.657039	0.112265	0.0597499	0.275301	0.393562	0.366877	0.0597499	0.239916	0.0597499	0.562872	0.930548	0	0.0597499	0	0	0.201389	0.393562	0.112265
218.403	0.163036	0	0.0891242	0.22618	0.281297	0	0	0.374151	0.484316	0.22618	0.281297	0	0.22618	0.0891242	0.374151	0.22618	0	0	0.163036	0	0.374151	0.867946	0.414059	0.0891242	0.867946	0	0.484316	0.22618	0	0.515596	0.778975	0.687746	0.0891242	0	0.0891242	0.0891242	0.515596	0.0891242	0	0.0891242	0.515596	0.778975	0	0	0.163036	0	0	0.0891242	0
221.901	0.0864539	0	0.0864539	0.274402	0.220315	0	0.0864539	0.505509	0	0.274402	0	0	0.40515	0	0.714751	0.441242	0	0	0	0.0864539	0.274402	0.505509	0.220315	0	0.732819	0.220315	0.0864539	0.220315	0	0.441242	0.766845	0.611054	0.220315	0.220315	0.274402	0.365785	0.322493	0	0	0.0864539	0.695898	1.06343	0.0864539	0.158522	0.0864539	0	0	0.0864539	0
228.849	0.165872	0	0.229854	0.165872	0.165872	0	0	0.490383	0	0.165872	0.165872	0.165872	0.521868	0	0.335014	0.165872	0	0	0.165872	0	0.628983	1.15399	0.165872	0.28561	0.818318	0	0	0.0908074	0	0.604578	0.652089	0.551223	0.0908074	0.165872	0.165872	0.0908074	0	0	0.229854	0.0908074	0.652089	0.960924	0.165872	0.0908074	0.229854	0	0	0.28561	0.229854
232.369	0.0945791	0	0.503761	0.345677	0.295179	0	0.0945791	0.469302	0	0.345677	0.172199	0.295179	0.345677	0	0.469302	0	0.0945791	0	0	0	0.431872	0.0945791	0.238028	0.172199	0.943786	0	0.345677	0.238028	0	0.667419	0.619408	0.619408	0.0945791	0	0.345677	0	0.295179	0	0.172199	0.172199	0.593254	1.15041	0.503761	0.238028	0	0	0.0945791	0.172199	0
235.914	0	0.119241	0.252826	0.484828	0.354842	0	0.0637003	0.289559	0.119241	0.168478	0.354842	0.212697	0.384138	0.168478	0.411582	0	0.0637003	0	0	0.119241	0.384138	0.168478	0.354842	0	0.74674	0.212697	0.168478	0	0	0.411582	0.650843	0.73427	0.119241	0	0.411582	0.119241	0.323426	0	0	0	0.547485	1.08129	0.119241	0.289559	0	0	0.168478	0.384138	0.168478
238.332	0	0.101696	0.312898	0.560925	0.671537	0	0	0.101696	0	0.253231	0.184039	0.253231	0.101696	0	0.671537	0.184039	0.253231	0	0	0	0	0.101696	0.101696	0.184039	0.646411	0	0	0.184039	0	0.184039	0.695288	0.412143	0.184039	0	0.253231	0.101696	0.253231	0	0	0	0.253231	0.619743	0	0	0.184039	0	0.454382	0.312898	0
239.994	0.254503	0.145633	0.621929	0.475966	0.254503	0	0	0.530256	0	0	0	0	0.530256	0	0.341478	0	0	0	0	0.254503	0.621929	0.730982	0.254503	0	0.912292	0	0	0.413907	0	0.730982	0.818073	0.621929	0.254503	0	0.145633	0.254503	0.341478	0	0	0	0.530256	0.730982	0	0	0	0	0	0.254503	0
251.825	0.0966934	0	0.719282	0	0.35158	0	0	0.0966934	0	0	0.17573	0	0.438643	0	0.0966934	0.0966934	0	0	0	0	0.543294	1.02021	0.39729	0.300488	0.0966934	0	0.17573	0	0	0.300488	0.988032	0.965175	0.17573	0	0	0.62756	0	0	0	0	0.17573	1.00975	0.35158	0.17573	0	0	0.0966934	0	0.39729
254.333	0.124578	0.124578	0	0.563221	0.635711	0.521868	0	0.300308	0	0.367152	0	0.300308	0	0	0.521868	0	0.124578	0	0	0	0.124578	0.476158	0.221271	0.521868	0.300308	0.124578	0.425066	0.221271	0	0.476158	0.901826	0.521868	0.300308	0	0.124578	0.300308	0.221271	0	0	0	0.725825	0.936574	0.563221	0.367152	0.221271	0.124578	0.221271	0	0.300308
258.312	0	0	0.198117	0.727156	0.520109	0.480456	0	0.480456	0	0	0	0	0.271156	0	0.589969	0	0	0	0	0	0.110259	0.589969	0.110259	0.198117	0.480456	0	0.520109	0.271156	0	0.520109	1.03449	0.915159	0	0	0.110259	0.388294	0.436815	0	0.198117	0	0.388294	0.998239	0.110259	0	0	0.198117	0	0	0.388294
260.821	0	0	0.354613	0.303218	0.442115	0.0977865	0	0.354613	0.0977865	0	0.244914	0.177551	0.177551	0	0.54719	0	0.0977865	0	0	0	0	0.354613	0.442115	0.177551	0.680143	0	0.400564	0.303218	0	0.864103	1.15018	0.51491	0	0.177551	0	0.400564	0.354613	0	0	0	0.723696	0.945876	0	0.400564	0	0	0	0	0.244914
263.329	0.102419	0	0.185235	0.367316	0.102419	0	0.102419	0.314674	0	0.102419	0	0.102419	0.314674	0	0.456624	0	0.102419	0	0	0.102419	0.314674	1.26215	0	0	0.800659	0	0.314674	0	0	0.762471	0.912798	0.414262	0.102419	0	0.102419	0.102419	0.185235	0	0.102419	0	0.367316	1.06589	0.102419	0	0	0	0	0.102419	0.102419
265.837	0	0	0.392168	0.712353	0.505216	0	0	0.296225	0	0.172894	0	0.238923	0.346841	0	0.537188	0	0.0949945	0	0	0	0.296225	0.594833	0.0949945	0.0949945	0.392168	0.0949945	0.732472	0.0949945	0	1.07927	1.15979	0.645715	0.0949945	0	0	0.392168	0.172894	0.0949945	0.0949945	0	0.505216	0.957534	0	0.433208	0.0949945	0	0	0.0949945	0
270.853	0.0927541	0	0.0927541	0.723104	0.290565	0	0.0927541	0.0927541	0	0.169142	0.169142	0.0927541	0.385351	0	0.760566	0	0.0927541	0	0	0	0.340539	1.15635	0.169142	0.0927541	0.660052	0.0927541	0.529039	0	0	0.425969	0.703087	0.703087	0.234083	0	0	0.385351	0.290565	0	0	0.0927541	0.425969	1.08602	0.0927541	0.290565	0	0.497325	0	0.234083	0.234083
275.809	0.186446	0	0.369305	0.700829	0.316471	0	0	0.700829	0	0	0.256306	0.103152	0.416404	0.186446	0.416404	0.103152	0	0	0	0.103152	0	0.416404	0.256306	0	0.871241	0	0.103152	0.186446	0	0.369305	0.565962	0.256306	0.416404	0	0.103152	0.369305	0.103152	0	0	0	0.803589	0.981324	0.186446	0	0.103152	0	0	0.186446	0
288.242	0.233225	0.168478	0	0.339418	0.233225	0	0	0.384138	0	0.233225	0.289559	0.168478	0.168478	0.0923581	0.233225	0.339418	0.0923581	0	0.168478	0	0.233225	0.289559	0.289559	0.339418	0.721432	0	0.527587	0	0	0	0.461759	0.635236	0.384138	0	0.233225	0.289559	0.557102	0	0.233225	0	0.557102	0.945464	0	0.168478	0.168478	0	0.289559	0.0923581	0.289559
290.369	0	0.0868006	0.221079	0.716299	0.366877	0	0	0.442466	0.0868006	0.0868006	0	0.506828	0.221079	0.0868006	0.323499	0.275301	0.0868006	0	0	0	0.275301	0.221079	0	0	0.677704	0.0868006	0.475838	0	0	0.406314	0.677704	0.814978	0.159109	0	0.366877	0.221079	0.275301	0.159109	0.221079	0.0868006	0.612503	1.00306	0.0868006	0.221079	0	0	0	0.275301	0.159109
294.514	0.0902393	0	0.164916	0.377612	0.164916	0	0	0.377612	0	0.284157	0	0.164916	0.228616	0	0.519758	0.0902393	0.228616	0	0.164916	0	0.228616	0.899186	0.228616	0	0.549054	0	0.417742	0	0	0.228616	0.519758	0.519758	0.164916	0	0.0902393	0	0.377612	0	0.333394	0	0.576498	1.10647	0.164916	0	0	0	0.0902393	0.284157	0
300.703	0.0991315	0	0.0991315	0.0991315	0.484482	0	0.0991315	0.247784	0.0991315	0.358325	0	0.179787	0.358325	0	0.636822	0	0.306562	0	0.179787	0	0.247784	1.06118	0.179787	0	0.707788	0	0.306562	0.0991315	0	0	0.404571	0.55195	0.179787	0	0.306562	0	0.179787	0	0.0991315	0	0.55195	0.96403	0	0.0991315	0	0.0991315	0.0991315	0.358325	0.0991315
302.885	0.162419	0.0887587	0	0.57067	0.22538	0	0	0.329151	0	0	0.0887587	0	0.162419	0	0.892246	0.162419	0.162419	0	0	0	0	0.280357	0	0.449333	0.329151	0	0.22538	0.0887587	0	0.22538	0.724963	0.373012	0.373012	0	0.0887587	0	0.22538	0	0.0887587	0.280357	0.643587	1.05808	0.329151	0.162419	0.0887587	0.162419	0.0887587	0.412847	0.0887587
304.875	0.17537	0.0964777	0.17537	0.718407	0.475678	0	0	0.35098	0	0	0.17537	0.0964777	0.0964777	0	0.873185	0	0.396642	0	0.35098	0	0.0964777	0.510385	0.242111	0.0964777	0.542522	0	0	0.17537	0	0.299948	0.674984	0.35098	0.242111	0	0.299948	0.299948	0.299948	0	0.17537	0	0.475678	0.952318	0.35098	0.35098	0	0	0.17537	0.35098	0.299948
309.019	0.17829	0.0982307	0	0.548767	0.17829	0	0	0.355841	0	0.17829	0	0.245863	0.355841	0	0.516438	0.17829	0.0982307	0	0.0982307	0	0.0982307	1.11156	0.17829	0	0.548767	0.17829	0	0.0982307	0	0.245863	0.658326	0.783628	0.481508	0	0	0	0.304324	0	0.17829	0.0982307	0.245863	0.355841	0.0982307	0.0982307	0.0982307	0	0.0982307	0.304324	0.17829
317.308	0	0.100281	0.181695	0.586266	0.25023	0	0	0.309409	0.100281	0	0.309409	0.181695	0.361483	0.407976	0.733645	0	0.309409	0	0.309409	0	0.309409	0.859364	0.449969	0	0.666177	0	0	0.100281	0	0.100281	0.689851	0.488258	0.100281	0	0.181695	0	0.25023	0	0.100281	0	0.449969	0.586266	0	0.25023	0	0	0.100281	0.181695	0.25023
319.325	0	0	0.257873	0.41857	0.41857	0	0	0.499984	0	0	0.103896	0.103896	0.318289	0.103896	0	0.103896	0	0	0.103896	0	0.461182	1.33326	0.318289	0	0.318289	0	0.103896	0.103896	0	0	0.318289	0.535602	0.103896	0	0.103896	0	0.461182	0	0.103896	0.103896	0.318289	0.535602	0.103896	0.103896	0	0	0.187673	0.371318	0.318289
323.497	0.0952035	0	0.347426	0.239373	0	0	0.3928	0.567741	0.0952035	0.0952035	0.239373	0.0952035	0.173243	0.0952035	0.537942	0	0	0	0	0	0.3928	0.3928	0.347426	0.239373	0.505948	0	0	0.0952035	0	0.239373	0.621828	0.621828	0.173243	0	0.296751	0	0.239373	0	0	0.239373	0.505948	0.788667	0	0.173243	0.3928	0	0	0.471407	0
324.671	0	0	0	0.418207	0	0	0	0.34529	0	0	0	0	0.257611	0	0	0	0	0	0	0	0	0	0.70317	0	0.480624	0	0	0	0	0.34529	0.666866	0.418207	0.147633	0	0	0	0.34529	0	0	0	0.147633	0.147633	0	0	0	0	0.257611	0.34529	0
332.007	0.253231	0	0.312898	0.591329	0.184039	0	0	0.454382	0.184039	0.184039	0.101696	0	0.184039	0	0.101696	0.101696	0.253231	0	0	0	0.36535	0.454382	0.492875	0.253231	0.412143	0	0.36535	0.253231	0	0	0.987091	0.815637	0.184039	0	0.312898	0.101696	0.528231	0	0	0	0.184039	0.253231	0.528231	0	0	0	0.184039	0.36535	0
334.231	0	0	0.413907	0.730982	0.341478	0	0	1.1255	0	0	0.341478	0	0.254503	0	0.254503	0.145633	0	0	0	0	0.254503	0.578507	0.254503	0	0.730982	0	0	0	0	0.790938	0.890584	0.952702	0	0	0	0	0.341478	0	0	0	0.413907	0.578507	0	0	0	0	0	0.254503	0
336.151	0.205762	0	0.205762	0.400564	0.114955	0	0	0.901442	0.114955	0.114955	0.400564	0	0.534565	0	0.848842	0.114955	0	0	0	0	0.400564	1.35247	0.280827	0	0.534565	0	0.534565	0.280827	0	0.534565	0.666177	0.948354	0	0	0	0	0.400564	0	0	0	0	0.666177	0.400564	0	0	0	0	0.114955	0
340.295	0	0	0.254759	0.674255	0	0	0	0.622368	0	0	0	0	0.102419	0	0	0	0.254759	0	0	0	0.456624	1.51387	0.102419	0	0.314674	0.102419	0.622368	0.102419	0	0.254759	0.781984	0.953215	0	0	0.185235	0	0.102419	0	0	0	0.254759	0.530663	0.367316	0.102419	0	0	0	0.254759	0
341.442	0	0.340539	0.474817	0.620615	0	0	0	0.696204	0	0.145142	0	0	0.253738	0	0.145142	0.253738	0	0	0.253738	0	0	1.2568	0	0	0.620615	0	0	0	0	0.789491	0.910777	0.970037	0	0	0	0	0	0	0	0	0.696204	0.412847	0.789491	0	0	0	0	0.145142	0
344.44	0	0	0.207263	0.402958	0.11588	0.11588	0.11588	0.346987	0.11588	0	0.28272	0	0.346987	0.11588	0.452532	0	0	0	0	0	0.207263	0.402958	0.28272	0.207263	0.792306	0	0.207263	0.11588	0	0.28272	1.17803	1.17803	0.28272	0.11588	0.11588	0	0.28272	0	0.11588	0	0.497023	0.207263	0.81322	0	0	0	0.11588	0.28272	0.11588
348.584	0	0.16881	0.233653	0.462434	0.0925556	0	0	0.233653	0	0.384744	0.290061	0	0.496621	0.0925556	0.681284	0.0925556	0	0	0	0	0	1.22212	0.290061	0.425324	0.462434	0	0	0.528312	0	0.16881	0.585501	0.909871	0	0	0.16881	0.16881	0.339978	0	0.0925556	0	0.16881	0.0925556	0.585501	0	0	0	0	0.384744	0.339978
356.735	0	0.18286	0.251721	0.490554	0	0	0.100984	0.846395	0	0.18286	0.100984	0	0.410048	0	0.906769	0	0.251721	0	0	0	0.18286	1.46646	0.18286	0.100984	0.363405	0	0	0.311143	0	0.100984	0.490554	0.794878	0.18286	0	0	0.251721	0.18286	0	0	0.100984	0.100984	0	0.490554	0	0	0	0	0.452164	0.100984
358.917	0	0.0828155	0.212255	0.61818	0.212255	0	0	0.519949	0.0828155	0	0.311843	0	0.3928	0	0.698239	0	0.212255	0	0	0.0828155	0.212255	0.982879	0.15234	0.354205	0	0.0828155	0.595626	0.311843	0	0.0828155	0.63962	1.09147	0.264897	0	0.264897	0.0828155	0.212255	0	0	0.15234	0.595626	0.3928	0.3928	0	0	0.15234	0.15234	0.0828155	0
363.062	0.0939628	0	0	0.389038	0.171168	0	0	0.687059	0.0939628	0.236698	0.0939628	0	0.343946	0.0939628	0.236698	0.171168	0.171168	0	0	0.171168	0.293624	0.293624	0.236698	0.293624	0.389038	0.0939628	0.236698	0.501595	0.0939628	0.171168	0.708105	0.81661	0.343946	0.171168	0.236698	0	0.343946	0.171168	0	0.293624	0.171168	0.171168	0.81661	0.0939628	0.171168	0	0.0939628	0.236698	0.236698
367.151	0	0	0.107783	0.266013	0	0	0	0.612635	0.107783	0.194065	0.194065	0	0.194065	0	0.612635	0	0.266013	0	0	0	0.194065	0.194065	0.194065	0.327719	0.857163	0	0	0	0	0.429775	0.802918	0.694049	0.429775	0	0.107783	0.107783	0.381738	0	0.107783	0	0	0.107783	0	0.107783	0.107783	0	0.194065	0.512354	0
368.947	0.100281	0	0	0.488258	0	0	0	0.614569	0	0.309409	0.181695	0.100281	0	0	0.859364	0	0.309409	0	0	0	0.100281	0.25023	0.181695	0.361483	0.361483	0	0	0.100281	0	0	0.7123	0.449969	0.309409	0	0.523442	0.181695	0.25023	0	0	0.181695	0.586266	0.100281	0.181695	0	0.100281	0	0.181695	0	0.181695
373.091	0	0	0	0.472113	0.0954136	0	0	0.472113	0	0.297279	0.239825	0.239825	0.0954136	0	0.78956	0	0.348013	0	0	0	0.239825	0.868539	0.348013	0.297279	0.670756	0	0.0954136	0.0954136	0	0.173594	0.838648	0.647364	0.393435	0	0.173594	0.173594	0.173594	0	0	0	0.173594	0.0954136	0	0	0	0	0	0.173594	0.0954136
377.236	0.143449	0.0776203	0.143449	0.29633	0.143449	0	0	0.498675	0.143449	0.29633	0.2006	0	0.143449	0	0.441106	0.0776203	0.0776203	0	0	0	0.470844	0.29633	0.29633	0.2006	0.673776	0.0776203	0	0	0	0	0.824461	0.708386	0	0	0.374723	0	0.251097	0	0	0.0776203	0.655379	0.964692	0.143449	0.0776203	0.0776203	0	0	0.2006	0.2006
382.43	0.103896	0	0	0.461182	0	0	0	0.41857	0	0.318289	0.187673	0	0.318289	0	0.568519	0	0.103896	0	0.103896	0.103896	0.257873	0.599116	0.187673	0	0.568519	0	0.187673	0	0	0.257873	0.599116	0	0	0	0.257873	0	0.187673	0	0	0	0.535602	1.03059	0	0	0.187673	0	0.187673	0.103896	0.257873
386.574	0.0980081	0	0	0.0980081	0.0980081	0	0	0.30377	0	0.515673	0.17792	0	0.0980081	0	0.606164	0.0980081	0	0	0	0	0.0980081	0.764186	0.245388	0	0.442817	0	0	0	0	0	0.30377	0.401226	0.17792	0	0.245388	0	0.355226	0	0.0980081	0.17792	0.442817	0.800473	0	0	0.245388	0	0.17792	0	0
[truncated: 47 more columns]

## Sheet: (%>2)
Age (ka)	Archipera triclavigera	Arachnocoralium calvata	Arachnocorys castanerides	Botryostrobus auritus/australis gr,	Botryopyle scatum	Cornutella profunda	Cycladophora bicornis	Cycladophora davisiana	Lampromitra erosa	Lithomelissa setosa	Lophophaena hispida	Lophophaena thoracites	Plectacantha oikiskos	Pseudocubus obeliscus	Pseudodictyophimus gracilipes	Pterocanium praetextum	Pterocorys clausus	Stichocorys seriata	Zygocircus productus	Verticillata hexacantha	Actinomma boreale/leptodermum	Actinomma medianum	Dictyocoryne spp,	Didymocyrtis tetrathalamus	Druppatractus irregularis	Larcopyle buetschlii	Lithelius minor	Lithelius nautiloides	Phorticium pylonium	Spongodiscus cf, resugens	Spongodiscus spp,	Spongosphera streptacantha	Stylochlamydium asteriscus	Stylodictya ssp,	Tetrapyle octacantha grp,	Acrobotrys teralans	Lophophaena variabilis	Eucecryphalus gegenbauri	Helothulus histricosus	Theocorthium turgidulum	Siphocampe lineata	Stylosphaera pyriformis	Larcopyle weddelium				Age (ka)	Cycladophora davisiana
0.789403	1.71184	3.85164	3.13837	0.85592	0.713267	0.42796	0.85592	0	2.99572	2.71041	3.70899	1.85449	1.71184	3.99429	2.71041	0.285307	1.28388	0.85592	2.1398	1.28388	1.56919	0.142653	1.42653	1.14123	0.42796	3.42368	0.570613	1.56919	2.1398	3.13837	0.713267	1.14123	0.142653	0.42796	17.4037	2.28245	1.56919	0.570613	0.42796	0	0	0	0				0.789403	0
1.51741	4.77941	5.14706	4.04412	1.47059	0	1.10294	0	0.367647	0	0	0.735294	2.20588	0.367647	1.47059	1.47059	0	0.735294	0.367647	1.10294	0	1.83824	0	1.83824	1.10294	0	2.57353	0.735294	0.735294	5.14706	0.367647	0	0.735294	0	1.10294	20.5882	1.47059	2.20588	0	0	0	0	0	0.735294				1.51741	0.367647
3.42074	2.07547	5.09434	3.96226	1.50943	0.566038	0.377358	1.50943	0.188679	2.64151	2.45283	2.83019	2.07547	1.69811	4.90566	3.39623	0.566038	1.50943	1.69811	2.64151	2.26415	1.69811	0	1.69811	0.754717	0.377358	3.20755	0.188679	0.943396	1.88679	3.01887	0.188679	1.50943	0	0	14.5283	1.88679	1.13208	0.566038	0.754717	0.188679	0	0	0.754717				3.42074	0.188679
6.05209	1.38313	4.56432	3.45781	0.829876	0.968188	0.829876	1.93638	0	2.62794	1.1065	3.18119	2.07469	2.90456	5.94744	1.52144	1.38313	1.38313	1.93638	3.3195	1.93638	1.65975	0	1.65975	1.93638	0.138313	4.01107	0	1.38313	1.52144	3.73444	0	1.38313	0.276625	0	10.6501	0.829876	1.93638	0.968188	0.414938	0.55325	0	0.414938	0.138313				6.05209	0
6.78009	3.90071	5.67376	1.06383	1.77305	1.41844	0.35461	0.35461	0.70922	1.06383	0.70922	2.12766	1.41844	0.35461	0	0	1.41844	0	0	2.12766	0	0.70922	0	0.70922	0.35461	2.12766	0	1.06383	0.70922	3.19149	4.96454	0	0	0	0.70922	9.92908	2.48227	0.70922	0	0	0	0	0	2.48227				6.78009	0.70922
7.48178	0.911854	6.68693	0.911854	4.25532	0.303951	0.303951	2.12766	0	1.82371	0.911854	1.51976	0.911854	2.12766	4.25532	2.12766	0.911854	0.911854	0.607903	0.607903	0	1.21581	0	1.21581	1.21581	0.607903	0.911854	0.607903	0	3.03951	2.43161	0	0	0	0.911854	11.8541	1.21581	0.911854	0	0	0	0.911854	0	1.51976				7.48178	0
8.73606	2.76817	6.05536	4.84429	1.38408	0.17301	0.692042	1.55709	0.692042	2.94118	3.63322	0.865052	0.865052	3.2872	12.9758	5.70934	0.17301	1.21107	1.55709	1.38408	2.24913	0.692042	0	0.692042	0.865052	0.519031	2.24913	0.17301	2.07612	0.692042	1.21107	0.865052	2.76817	0.17301	0.17301	4.67128	0.519031	0.519031	0.692042	0.519031	0.17301	0	0	0.865052				8.73606	0.692042
10.1658	1.9084	3.43511	6.48855	3.81679	0.381679	1.52672	2.67176	0.763359	2.29008	2.29008	0.381679	1.52672	5.34351	6.48855	5.34351	0.381679	1.9084	0	0.381679	0	0	0	0	0.763359	0.381679	2.29008	0.381679	0.763359	4.96183	1.52672	0	0	0	0	6.48855	0	0.763359	0	0	0.763359	0	0	1.9084				10.1658	0.763359
11.3674	2.14876	4.46281	6.28099	2.97521	0	0.495868	0.991736	0.330579	3.47107	1.98347	0.495868	3.96694	2.97521	5.78512	5.45455	0.330579	0.826446	1.4876	1.81818	0.495868	1.81818	0.165289	1.65289	0	0	3.30579	1.15702	2.14876	1.4876	4.6281	0	0.826446	0.661157	0.495868	6.61157	1.32231	0.495868	0.495868	0.165289	0.165289	0	0	0				11.3674	0.330579
13.9987	7.40741	4.13943	6.97168	0	0	0.43573	0.87146	0	2.39651	29.4118	0.217865	3.48584	0.653595	9.58606	3.26797	0.43573	0.43573	0.87146	1.08932	0.43573	0.43573	0	0.43573	0	0.653595	2.61438	0	0.87146	0.87146	1.52505	1.08932	0.653595	0	0	2.61438	0	0	0	0	0	0	0	0.653595				13.9987	0
14.7267	0	2.4	4	4	0	0.4	1.2	0	0	37.2	0.8	1.6	2.8	0.8	4	0.4	0	0	0	0	1.2	0	1.2	0	2.4	2.8	0.8	0	5.6	1.2	0	0	0	0	2.4	0	0	0	0	0	0	0	0				14.7267	0
17.823	2.1097	2.95359	9.49367	1.68776	0	0	1.47679	0.632911	1.47679	44.3038	0.421941	0.843882	0.632911	4.85232	1.68776	0	0.843882	0.632911	0	0.421941	0.21097	0	0.21097	0.21097	0	1.47679	0.632911	1.26582	0	1.05485	0.632911	0.21097	0	0	3.37553	1.26582	0.843882	0	0	0	0	0	0.21097				17.823	0.632911
20.4543	0.573614	3.25048	3.25048	0.382409	0	0.764818	0.764818	1.72084	2.29446	39.1969	0.764818	4.78011	0.956023	3.44168	3.63289	0.764818	1.14723	0.956023	0.382409	0	1.91205	0.191205	1.72084	0.191205	0.382409	1.72084	0.764818	0.956023	0.764818	2.67686	0.956023	0	0.191205	0.191205	3.44168	0	2.10325	0	0.191205	0.382409	0	0	0.382409				20.4543	1.72084
23.0856	0.88968	5.16014	3.20285	0	0.177936	0.533808	1.42349	1.06762	1.60142	15.3025	0.533808	5.33808	1.77936	6.76157	6.76157	0.88968	0.711744	1.42349	0.88968	0.533808	1.24555	0	1.24555	0.533808	0	3.20285	0.88968	1.9573	0.88968	3.20285	1.24555	0.533808	0.533808	0	5.87189	0.533808	0.177936	0	0.533808	0	0	0	2.31317				23.0856	1.06762
25.717	0.540541	5.94595	0	0	0	0.540541	0.27027	0.810811	0.810811	28.6486	0	0.810811	0	5.67568	4.59459	0	0.540541	1.62162	0.27027	0.540541	0.810811	0.540541	0.27027	1.08108	0	1.08108	0.810811	2.7027	1.35135	1.35135	0	0.810811	0	0.540541	4.32432	0	0.27027	0	1.35135	0.810811	0	0.540541	1.35135				25.717	0.810811
28.7167	1.46751	5.24109	0	0	0	0.838574	2.30608	0.209644	1.67715	23.4801	1.04822	1.25786	0	4.8218	4.8218	0.838574	0.838574	1.04822	0.419287	0	2.09644	0.209644	1.88679	0.209644	0	4.61216	0	4.19287	0.628931	2.93501	0.628931	0.628931	0.838574	0	3.14465	1.46751	0	1.67715	1.67715	0	0	0	0.628931				28.7167	0.209644
31.3481	0.934579	4.04984	1.86916	0	0.623053	0.623053	2.49221	0.934579	1.24611	11.215	0	0	0	2.49221	0.934579	0.311526	1.24611	2.49221	0.934579	0	3.73832	0.623053	3.11526	1.24611	0.623053	5.60748	1.86916	1.86916	2.49221	2.18069	0.623053	0.623053	1.24611	0	9.34579	0.311526	0.934579	0.623053	1.24611	0.934579	0	0.623053	1.55763				31.3481	0.934579
32.1375	1.00334	1.00334	0.334448	1.17057	0.167224	0.668896	2.00669	0.334448	1.67224	28.5953	0.334448	0	0	6.35452	0.83612	0	0.334448	1.00334	2.00669	0.668896	0.668896	0	0.668896	0.334448	1.00334	4.01338	0	0.668896	4.68227	2.17391	0.501672	3.34448	0.83612	0	7.85953	1.17057	0	0.501672	0.167224	0.83612	0	0	0				32.1375	0.334448
34.7688	0.414938	2.07469	1.65975	0	0.207469	1.45228	0.207469	0.622407	1.65975	5.80913	0.207469	2.28216	0	5.18672	4.97925	1.24481	1.03734	3.3195	2.28216	0	0.414938	0.207469	0.207469	0.622407	0	5.18672	0.622407	2.6971	2.48963	0.829876	0.622407	0.622407	1.03734	0.829876	4.35685	0.207469	0	0	0	2.07469	0	0	1.86722				34.7688	0.622407
37.2894	1.83486	2.06422	1.6055	0	0	0.688073	1.37615	0.229358	1.14679	30.7339	0.688073	0.917431	0	2.98165	3.89908	0.688073	1.37615	0.688073	2.52294	0	0.688073	0	0.688073	0.229358	0	2.06422	0.458716	3.21101	1.6055	2.29358	1.14679	2.06422	0	0.229358	4.3578	0	0.229358	0	0	0.229358	0	0	1.83486				37.2894	0.229358
39.7511	0.199601	1.39721	0.199601	0.798403	0.199601	0.399202	0.998004	0.399202	2.59481	32.7345	1.79641	2.39521	0	5.38922	4.79042	0.199601	0.798403	1.79641	0.598802	0.199601	1.1976	0.399202	0.798403	0.399202	0.998004	1.99601	0.598802	1.99601	1.79641	0.199601	2.79441	1.79641	0.199601	0.399202	2.99401	0.399202	0	0.399202	0	0	0	0	0				39.7511	0.399202
42.2129	1.0352	4.34783	1.0352	1.0352	0	0	1.24224	0.207039	1.65631	43.6853	0.414079	0	0	4.34783	2.48447	0.828157	0.414079	1.65631	1.0352	0	0.828157	0.414079	0.414079	0.207039	0.414079	2.69151	0.207039	1.44928	0.828157	1.24224	0.414079	2.69151	0.414079	0	4.34783	0	0	0	0	0.414079	0	0	0				42.2129	0.207039
44.6911	0.341297	2.73038	1.19454	0.853242	0	0	0.853242	0.341297	0	29.8635	0	2.21843	0	8.19113	4.09556	0.682594	2.04778	2.21843	1.19454	0.682594	0	0	0	0.853242	0	1.87713	0.853242	0.853242	1.53584	2.04778	0.341297	1.87713	0	0.511945	6.31399	0.170648	0.853242	0.341297	0.511945	0.511945	0	0	0.511945				44.6911	0.341297
47.1529	0.231481	5.78704	1.85185	0	0	0.231481	0.694444	0	2.08333	19.213	0.925926	2.08333	0	4.16667	1.85185	0	2.08333	2.08333	2.31481	1.62037	1.62037	0.231481	1.38889	1.85185	0	0.925926	0.462963	0.694444	2.5463	2.08333	0.231481	0.925926	0	0	6.71296	0.925926	0.925926	0	0	0	0	0	0.694444				47.1529	0
49.6147	0.438596	2.63158	2.85088	1.75439	0.219298	1.09649	1.31579	0	1.75439	31.5789	1.09649	0.219298	0	5.48246	4.38596	0.657895	0.438596	2.19298	1.31579	0.438596	1.75439	1.53509	0.219298	0	0.657895	2.19298	0	1.09649	2.85088	1.09649	0	0.877193	0.657895	0	6.79825	1.31579	0	0.438596	0.219298	0	0	0	0.438596				49.6147	0
52.0765	0	4.21793	0.702988	0	0.351494	1.23023	0.702988	0	2.10896	20.5624	1.05448	0.527241	0	10.1933	7.38137	0.878735	0.527241	1.58172	1.05448	0.175747	2.6362	0.878735	1.75747	0.702988	1.05448	1.93322	0	0.175747	0.527241	2.10896	0.175747	4.21793	0.351494	0.878735	4.21793	0.351494	0	0	0	0	0	0	1.75747				52.0765	0
54.5383	1.41988	6.89655	0	1.62272	0.20284	0.40568	0	0.40568	1.62272	16.8357	1.21704	2.43408	0	11.5619	7.50507	0	0.608519	0.811359	1.21704	0.20284	2.0284	0.608519	1.41988	0.811359	2.0284	0.40568	0.40568	1.0142	1.21704	0	0	2.0284	1.0142	0	9.73631	0.608519	0.40568	1.0142	0	0	0	0	0.20284				54.5383	0.40568
57.0821	0.20202	3.43434	2.0202	1.0101	0	1.61616	1.81818	0.606061	3.23232	3.0303	0.40404	1.41414	0	7.87879	6.26263	0.40404	1.41414	3.63636	0.40404	0.606061	1.41414	0.20202	1.21212	0.808081	1.41414	4.24242	0	1.41414	1.61616	2.0202	1.21212	3.23232	0	0.20202	5.85859	1.0101	0	0.40404	0.20202	0	0	0	3.0303				57.0821	0.606061
58.1489	0	6.29067	1.51844	2.1692	0.433839	0.650759	0.650759	0.21692	3.90456	3.47072	1.73536	2.60304	0	10.1952	5.20607	0	0	1.73536	1.0846	1.0846	1.0846	0	1.0846	0.21692	0.867679	1.51844	1.0846	1.95228	0.867679	1.51844	1.0846	2.60304	0	0.650759	7.80911	1.51844	0	0	0	0	0	0	1.51844				58.1489	0.21692
60.6106	0	2.01613	0.201613	0.403226	0.403226	0.403226	0.201613	0	1.41129	39.3145	0.403226	1.00806	0	4.43548	3.83065	0	0.604839	1.41129	0	0	2.82258	1.6129	1.20968	0.403226	1.6129	1.6129	0.403226	1.41129	2.41935	1.6129	1.00806	1.6129	0.403226	0.604839	3.02419	0	0	0	1.6129	0	0	0	2.01613				60.6106	0
63.5812	1.21704	2.43408	1.41988	2.0284	0.20284	1.41988	1.82556	0	0.20284	11.359	1.41988	1.41988	1.41988	4.66531	3.44828	1.41988	1.0142	3.0426	2.23124	0	1.82556	0.811359	1.0142	1.41988	0	4.0568	1.21704	1.41988	3.0426	3.44828	0	0.40568	0.20284	0.20284	10.7505	1.41988	0	0	0.608519	0	0	0	0				63.5812	0
66.043	1.28205	2.5641	0.854701	0	0	0.641026	1.06838	0.42735	1.06838	23.9316	1.28205	2.5641	1.7094	6.41026	2.77778	0.641026	0.641026	1.49573	2.35043	0	1.7094	0	1.7094	0.641026	0.213675	1.92308	1.06838	0.42735	3.63248	3.4188	0	0.854701	0.854701	0.42735	8.76068	0.213675	0.213675	0.641026	0.42735	0	0.854701	0	1.06838				66.043	0.42735
68.5048	0.759013	4.36433	0.56926	0.56926	0.379507	0.759013	1.13852	0.948767	0.379507	29.4118	0.948767	1.13852	0.948767	3.41556	3.03605	0.189753	0.948767	1.51803	1.32827	0.189753	1.32827	0.948767	0.379507	1.32827	0.759013	1.89753	0.379507	0.56926	2.65655	3.03605	0	1.13852	0.759013	0	8.34915	0.379507	0.56926	0	1.13852	0	0	0	0.759013				68.5048	0.948767
71.3445	0.314961	5.66929	6.14173	2.67717	0.314961	0.629921	0.787402	0.629921	0.314961	18.7402	1.10236	2.20472	4.56693	4.09449	1.88976	0.787402	0.787402	2.3622	0.944882	0.472441	1.10236	0.629921	0.472441	1.25984	0.944882	3.77953	0.15748	0	0.472441	1.25984	0.472441	1.10236	0.314961	0.15748	9.6063	0.314961	0.15748	0	0	0	0.629921	0	0.944882				71.3445	0.629921
75.5526	0.419287	7.96646	4.8218	1.25786	0.209644	0.419287	0.838574	0.838574	0.419287	8.80503	1.67715	1.46751	6.91824	6.28931	2.93501	0.838574	1.04822	1.04822	1.67715	0	2.09644	1.04822	1.04822	1.67715	0.628931	3.56394	0.628931	0	0.628931	3.14465	0	1.04822	0.419287	0.628931	11.74	0.419287	0.628931	2.09644	0	0	0.628931	0	1.25786				75.5526	0.838574
78.5161	1.31148	4.42623	5.7377	1.47541	0	0.819672	2.29508	0.163934	1.47541	6.06557	2.95082	1.31148	1.14754	2.62295	3.77049	0.327869	2.13115	1.63934	0.983607	0	1.96721	0.327869	1.63934	0.983607	0.327869	2.78689	0	1.80328	1.47541	3.27869	0.491803	1.31148	0.327869	0.983607	12.1311	1.80328	3.27869	0	0.163934	0.491803	0.327869	0	0.655738				78.5161	0.163934
80.6103	1.22137	4.42748	6.56489	0.916031	0.152672	0.610687	1.83206	0	2.59542	7.48092	1.83206	0.916031	4.73282	5.49618	2.59542	0.305344	1.52672	1.98473	2.29008	0.458015	2.90076	0.763359	2.1374	0.916031	0.610687	2.44275	1.0687	0.763359	1.37405	3.81679	0.763359	0.610687	0	0.152672	10.5344	1.52672	0.458015	0.305344	0.305344	0.458015	0.610687	0	0.305344				80.6103	0
82.0921	0.505051	1.51515	4.0404	1.85185	0.16835	0.16835	1.17845	0.3367	1.6835	19.1919	1.51515	2.18855	3.7037	2.86195	1.85185	0.673401	0.841751	1.3468	0.505051	0.16835	6.06061	3.53535	2.52525	1.17845	0	4.0404	0.505051	0.3367	0.841751	3.87205	0	1.3468	0.16835	0	9.42761	0	1.17845	0.841751	0.505051	0.16835	0.505051	0	1.3468				82.0921	0.3367
85.0555	0.927644	2.5974	3.15399	1.2987	0	0.556586	1.66976	1.85529	1.2987	3.33952	1.2987	1.2987	3.33952	4.82375	1.48423	0.927644	0.556586	1.48423	0.371058	0.371058	2.96846	1.2987	1.66976	1.66976	0.556586	2.41187	0.556586	1.2987	4.26716	3.71058	0.927644	0.371058	0.185529	0.371058	12.0594	0.556586	0	0.742115	1.48423	0.371058	0.742115	0	1.66976				85.0555	1.85529
94.1436	1.1236	3.93258	2.43446	1.1236	0.561798	0.749064	1.31086	0	1.68539	8.98876	1.68539	2.43446	0.561798	1.87266	3.37079	0.561798	0.374532	2.05993	0.749064	0	2.62172	0.93633	1.68539	1.31086	1.31086	2.24719	0	0	1.49813	2.99625	0.374532	1.31086	0.561798	0	10.6742	0.749064	0.749064	0.187266	0	0	0.749064	0.187266	1.87266				94.1436	0
97.1071	0.490196	2.45098	2.45098	3.43137	0	0.490196	0.980392	0.490196	2.94118	7.84314	0.980392	0	1.96078	1.47059	1.96078	0.980392	0	0.490196	0.980392	0	1.96078	0.980392	0.980392	0.980392	0	4.41176	1.47059	1.47059	2.45098	5.39216	4.41176	0	0	1.47059	13.7255	0.980392	0.490196	0	0.980392	0	1.96078	0	0				97.1071	0.490196
102.461	3.67893	5.68562	0.668896	1.67224	0.501672	0.668896	0.167224	0.167224	0.334448	8.19398	1.50502	3.01003	4.34783	5.18395	4.01338	1.33779	1.00334	0.668896	2.17391	0	3.17726	0.668896	2.50836	1.00334	0.83612	3.01003	0	1.00334	1.67224	4.34783	0	1.83946	0.334448	0.167224	13.3779	3.34448	1.50502	0.167224	0.501672	0.167224	0.167224	0	1.50502				102.461	0.167224
105.425	1.53551	4.9904	5.18234	1.34357	0.767754	0.191939	0.767754	0.191939	1.34357	3.07102	1.34357	2.11132	0.383877	4.60653	1.53551	0.575816	1.53551	0.959693	1.72745	0.383877	0.959693	0	0.959693	0.767754	0.383877	2.68714	1.15163	0.767754	1.72745	5.18234	1.34357	1.91939	0	0.383877	12.2841	1.53551	2.68714	0	0	0	1.72745	0	0.191939				105.425	0.191939
108.419	3.46021	4.15225	5.53633	1.03806	0.346021	0.346021	1.21107	0.519031	1.38408	6.05536	0.865052	0.17301	1.7301	1.55709	2.76817	0.519031	0.692042	1.90311	1.7301	0	3.11419	1.7301	1.38408	2.07612	0.692042	1.7301	0.17301	0	1.90311	2.42215	1.03806	2.24913	0.17301	0.17301	8.65052	0.17301	0	0	0.519031	0	0.346021	0	0.346021				108.419	0.519031
111.969	0.849858	3.54108	1.41643	1.983	0.424929	0.849858	1.41643	0.424929	1.55807	20.255	0.849858	0.991501	0.849858	3.25779	2.40793	0.566572	1.13314	1.27479	2.26629	0	1.84136	0	1.84136	1.13314	0.991501	2.54958	0.283286	0.424929	0.991501	1.983	0.141643	2.26629	0	0.708215	9.34844	0.566572	0.141643	0	0.141643	0	0.141643	0	2.54958				111.969	0.424929
115.519	2.36407	4.49173	2.00946	1.65485	0.472813	0.591017	0.827423	0.472813	1.65485	3.30969	0.945626	1.41844	1.30024	1.89125	1.77305	0	0	0.945626	2.12766	0.236407	2.95508	0	2.95508	2.24586	0.827423	2.48227	0.827423	0	3.5461	4.01891	0.591017	0.827423	0	0.35461	18.4397	0.591017	0.591017	0.472813	0.827423	0.118203	0.35461	0	2.00946				115.519	0.472813
119.14	1.08959	3.02663	1.93705	1.45278	1.33172	0.605327	0.726392	0.242131	1.45278	1.81598	2.30024	0.847458	1.33172	4.60048	1.33172	1.08959	1.45278	0.726392	1.57385	0.726392	3.38983	0	3.38983	0.605327	0.484262	2.30024	0.242131	0.242131	2.17918	4.60048	0.968523	0.363196	0.121065	0.484262	20.9443	1.57385	1.93705	0.363196	0	0.242131	0.121065	0	0.726392				119.14	0.242131
120.122	0.865801	3.4632	0	2.1645	0	0.4329	1.7316	0	1.2987	0.4329	1.2987	1.2987	3.4632	4.7619	1.2987	2.5974	1.2987	1.2987	1.7316	0	1.7316	0	1.7316	0.865801	0	3.0303	0.4329	0	0	1.7316	0.865801	0.4329	0	0.865801	19.0476	0	0.865801	0	0	1.2987	0	0	0.865801				120.122	0
122.689	0.902935	2.7088	0.451467	2.0316	0.451467	1.12867	0.225734	0.451467	1.58014	3.83747	1.58014	0.451467	0.225734	5.86907	3.386	0.451467	0.902935	0.902935	1.12867	0.451467	2.7088	0	2.7088	0.902935	0.902935	3.16027	0.225734	2.0316	1.3544	4.06321	0.902935	1.80587	0.225734	0.451467	15.8014	1.12867	2.25734	0.225734	0.451467	0.225734	0	0	2.0316				122.689	0.451467
126.239	1.03306	4.33884	0.826446	2.47934	0.206612	0.826446	0.619835	0	1.44628	7.2314	0.619835	1.65289	1.44628	7.43802	7.2314	1.03306	1.03306	2.06612	1.65289	0.206612	0.206612	0	0.206612	0.413223	0.206612	1.65289	1.23967	1.65289	1.44628	1.23967	0.413223	0.619835	0	0.206612	4.33884	0.206612	0.619835	0.206612	0.619835	0	1.23967	0.413223	0.413223				126.239	0
129.789	1.2987	2.27273	3.24675	0	0	0.974026	1.62338	0.649351	1.94805	6.81818	2.92208	0	0	4.87013	5.84416	0.649351	0.649351	1.62338	1.62338	0	1.62338	0	1.62338	0.324675	0.649351	3.8961	1.2987	1.2987	0.649351	4.22078	1.2987	0	0	0	8.11688	1.62338	0	0.324675	1.2987	0	0.974026	0	0.324675				129.789	0.649351
130.499	0.990099	5.94059	4.62046	2.31023	0	0	0.660066	0	0.330033	5.94059	0.990099	0	1.65017	3.63036	7.92079	0	0.660066	2.9703	0.990099	0	0.990099	0	0.990099	0	2.31023	1.9802	0	0	1.9802	3.30033	0	0	2.31023	0	3.63036	0	0	0	1.32013	0	0.660066	0.330033	0.990099				130.499	0
134.049	1.89274	12.3028	3.15457	3.47003	0	0.315457	0.630915	0	0.630915	4.10095	0.630915	2.52366	0	1.57729	10.4101	0	0.315457	1.57729	0.315457	0.315457	0.946372	0.315457	0.630915	0	0	1.57729	0.315457	0	1.26183	1.26183	0	3.15457	0.630915	0	1.57729	1.57729	0.946372	0	1.26183	0	0.630915	0	0				134.049	0
137.599	0	3.5503	1.18343	1.77515	0	1.18343	1.18343	2.95858	0.887574	13.6095	0.591716	2.36686	0.591716	2.95858	3.25444	0	0.887574	2.36686	0	0.295858	0.591716	0	0.591716	0.887574	1.18343	3.25444	0	0	0.591716	1.77515	0	2.07101	0.295858	0.295858	2.95858	0.295858	0.591716	0	1.77515	0	1.18343	0	0				137.599	2.95858
141.148	0.58651	2.93255	2.93255	0.879765	0	0	0.293255	0.879765	0.879765	36.0704	0.293255	0.879765	2.05279	1.17302	2.34604	0	0.58651	0.879765	0	0	0.879765	0	0.879765	0.58651	0.58651	1.17302	0.293255	0	0.293255	2.34604	0	7.03812	0	0	1.17302	1.17302	0	0	0.58651	0.293255	0	0	0				141.148	0.879765
144.698	0	0.574713	4.02299	1.43678	0	0.287356	0.287356	0.287356	2.01149	11.4943	0.862069	0.862069	3.73563	1.43678	3.73563	0.862069	0	2.87356	0.574713	0	1.43678	0	1.43678	0	1.43678	3.16092	0	0	2.01149	2.58621	0	1.14943	0	0.287356	4.88506	1.14943	0.287356	0	1.14943	0.574713	0.574713	0	0				144.698	0.287356
147.964	3.13199	8.50112	5.14541	1.78971	0	0.671141	0.223714	0.447427	0	25.5034	1.11857	3.3557	1.34228	4.02685	2.23714	0	0.671141	1.11857	0	0	0	0	0	0.223714	1.34228	1.11857	0	0	0	1.11857	0	4.69799	0.447427	0	1.34228	0.894855	0	0	0.447427	0	0.223714	0.894855	0				147.964	0.447427
149.123	2.09302	6.27907	3.48837	2.32558	0	0	0.465116	1.16279	0	17.907	0	1.16279	0	6.51163	3.25581	0	0.930233	0.930233	0	0	0.465116	0.232558	0.232558	0	3.02326	1.86047	0	1.16279	0.232558	2.32558	0.465116	13.0233	0	0.232558	1.16279	0.232558	0	0.465116	0.232558	0	0	0	0.697674				149.123	1.16279
152.673	3.18627	10.049	5.39216	0	0	0.245098	1.71569	0	0	5.14706	1.22549	0.980392	0	8.82353	2.69608	0.245098	0	0.980392	0	0.490196	0.735294	0.245098	0.490196	0	5.39216	1.22549	0	1.22549	0.490196	0.490196	0	9.55882	0	0	1.47059	0.735294	0.980392	0	0.980392	0	0	0	2.69608				152.673	0
156.321	1.95228	2.81996	0.867679	0.650759	0	0.867679	0.433839	2.60304	0	44.4685	0.650759	0.21692	0	3.2538	3.2538	0	0	0.650759	0.21692	0	0.21692	0.21692	0	0	0.433839	0.650759	0.21692	1.51844	0	1.30152	1.0846	6.94143	0	0	1.73536	0.21692	0	0	1.30152	0	0	0	0.433839				156.321	2.60304
159.168	10.0917	3.89908	1.14679	2.06422	0	0.229358	1.14679	0.917431	0	5.27523	0.688073	0	0	4.81651	3.21101	0.458716	0.458716	1.14679	0	0	0.688073	0.229358	0.458716	0.458716	2.75229	1.14679	0.458716	0.229358	0	1.14679	2.06422	11.2385	0	0	3.21101	0.458716	0.688073	0.458716	1.14679	0	0	2.06422	0.458716				159.168	0.917431
162.015	1.18483	3.08057	1.89573	2.8436	0	0.473934	0	0	0.947867	6.63507	1.18483	0	1.89573	13.0332	4.50237	0	0.7109	1.4218	0.7109	0	0	0	0	0	3.08057	0	0	1.18483	0.7109	3.31754	0.473934	2.36967	0.7109	0	2.60664	0.473934	0	0	1.4218	0.236967	0	0	0.7109				162.015	0
164.767	0.247525	3.21782	2.47525	3.71287	0	0.49505	0.990099	0.49505	0	3.21782	0.247525	0.247525	1.48515	6.18812	5.19802	0.742574	0.247525	1.23762	0.49505	0	1.48515	0.247525	1.23762	0	0.990099	4.45545	0.49505	0.990099	0.990099	5.44554	1.48515	7.92079	0.990099	0.742574	1.73267	0.49505	0	0	1.48515	0	0	0	0.742574				164.767	0.49505
167.67	0.492611	4.18719	3.44828	2.95567	0	0	0.985222	6.65025	1.23153	3.44828	1.97044	1.72414	1.72414	6.15764	3.20197	0.985222	0.246305	2.21675	0	0	0.985222	0	0.985222	0	0.738916	1.97044	0.492611	0	0	3.44828	1.23153	5.66502	0.492611	0	3.44828	0.985222	0	0	0.492611	0	0.246305	0	0.985222				167.67	6.65025
170.517	2.16963	2.95858	3.94477	2.95858	0	0.788955	0.986193	3.94477	0	24.6548	0.197239	0.394477	3.94477	4.53649	0.788955	0	0.788955	0	0	0	0.394477	0.197239	0.197239	0.197239	0.591716	1.97239	0	0	0.788955	3.5503	1.57791	2.36686	0.591716	0	3.74753	0.591716	0	0	0.394477	0	1.38067	0.788955	0.197239				170.517	3.94477
172.813	1.875	2.70833	3.95833	3.125	0.208333	0.625	0.833333	3.95833	0	2.5	1.25	0.625	3.75	7.5	3.75	1.04167	0	2.91667	2.08333	0	1.45833	0	1.45833	0.208333	0.416667	2.70833	0.416667	1.04167	0	3.54167	0	1.25	0.208333	0	5.83333	1.66667	0	0	0	0.833333	0.416667	0	0.833333				172.813	3.95833
175.66	0.681818	2.95455	2.72727	3.18182	0.227273	2.04545	1.36364	5.22727	0.454545	2.27273	1.13636	0.909091	2.72727	8.18182	4.54545	0.454545	0.454545	1.59091	0	0	0.909091	0	0.909091	0.454545	1.36364	5	0.454545	1.81818	0.681818	3.63636	0	1.59091	0	0	6.36364	1.13636	0	0	0	0.909091	0	0	1.59091				175.66	5.22727
178.526	0	3.3419	0.771208	0.514139	0	0	0.514139	1.02828	0	39.3316	0.771208	0.257069	0.514139	5.39846	0.257069	0	0	0.514139	0	0	1.79949	0	1.79949	0	0	2.05656	0	0	1.79949	2.82776	0	1.79949	0	0	5.39846	1.02828	0	0	0	0	0	0	0.771208				178.526	1.02828
180.518	0	1.1655	0	3.9627	0	0.2331	0.4662	1.3986	0.4662	3.9627	0.2331	0	0.932401	6.52681	1.3986	0.4662	0.2331	1.1655	0	0	0.2331	0	0.2331	0	1.3986	3.0303	0.699301	0	1.1655	2.0979	0	0	0.699301	0	5.59441	0.932401	0.4662	0	2.0979	0	0.2331	0.2331	0.4662				180.518	1.3986
182.17	0.465116	2.32558	0.465116	1.86047	0	0	1.16279	2.32558	0.465116	1.39535	0	0	1.62791	8.83721	2.7907	1.62791	0	0.697674	0	0	1.16279	0	1.16279	0.465116	0	5.34884	1.16279	0	1.86047	6.51163	0	0.697674	0	0	5.34884	0.930233	0	0	1.16279	0	0.465116	0.232558	0.930233				182.17	2.32558
185.035	0	2.26757	2.04082	3.62812	0	0.907029	1.13379	0.680272	0.453515	2.04082	0.226757	0.680272	0.453515	13.3787	2.04082	0.453515	0.226757	2.49433	0.453515	0	1.81406	0.226757	1.5873	0.453515	0	4.98866	0.226757	1.13379	0	2.94785	0	0	0.680272	0	5.89569	1.13379	0	0	1.13379	0	0.226757	0	1.5873				185.035	0.680272
187.882	0.4914	5.40541	4.4226	1.7199	0	0.2457	0.982801	4.914	0.737101	1.2285	0	0	0.4914	12.7764	2.457	0	0.2457	1.2285	0.4914	0	0.2457	0	0.2457	0	0.737101	2.457	0.737101	1.9656	0	5.40541	0.2457	0.737101	0.2457	0	7.12531	1.9656	0.4914	0	0.737101	0	0.982801	0	3.1941				187.882	4.914
190.729	0	2.56917	1.18577	3.35968	0.395257	0.197628	1.58103	1.77866	0.790514	0.197628	0.197628	0.395257	0.592885	4.74308	2.37154	0.790514	0.988142	0.592885	0	1.18577	3.16206	0.395257	2.7668	0.395257	0.395257	2.96443	1.18577	0.197628	1.58103	3.35968	1.58103	0.197628	1.77866	0	12.253	0	0	0	1.58103	0	0.592885	0.592885	2.17391				190.729	1.77866
195.682	0.663717	1.32743	1.32743	1.99115	0.221239	0.221239	0.221239	1.99115	0.884956	8.62832	0.221239	0.884956	1.54867	2.43363	2.43363	1.32743	0.663717	0.663717	0.884956	0	0.884956	0	0.884956	1.10619	2.65487	3.31858	0.221239	2.43363	1.10619	2.65487	0	0.442478	0.221239	0	14.6018	0	0	0	0.221239	0	0.663717	0.442478	0				195.682	1.99115
199.203	0	2.9316	2.9316	1.9544	0.651466	0.814332	1.4658	0.325733	1.30293	2.9316	2.76873	0.325733	2.28013	4.72313	2.443	0.325733	0.651466	1.30293	1.30293	0	2.11726	0	2.11726	0.977199	0	2.28013	0.651466	0.488599	1.30293	3.90879	1.14007	0.325733	0.325733	0	19.2182	0.325733	0.977199	0	0.325733	0.488599	0.488599	0.325733	1.62866				199.203	0.325733
202.724	0	2.47148	2.6616	1.52091	0.190114	0.570342	2.28137	1.90114	2.28137	4.75285	0.760456	0.190114	1.71103	2.09125	0.380228	0.95057	0.95057	0.95057	0.760456	0	0.570342	0	0.570342	0.380228	0.95057	3.42205	1.3308	0.570342	1.71103	3.61217	0.760456	0.380228	0.570342	0.380228	16.3498	0.760456	0.190114	0	0	0.190114	0.95057	0	2.09125				202.724	1.90114
206.245	1.23239	2.64085	0.528169	1.76056	0.704225	0.528169	1.05634	0.352113	0.176056	6.8662	1.76056	1.05634	0	1.93662	0.704225	0.704225	1.23239	0.176056	0.176056	0.176056	1.93662	0.176056	1.76056	1.23239	0	6.51408	1.23239	2.11268	2.11268	4.57746	0	0.528169	0.704225	0.352113	19.7183	0	0.352113	0	0.352113	0.176056	0.528169	0.704225	1.58451				206.245	0.352113
211.362	0	1.0929	1.0929	0	0.546448	0	0	1.63934	0	0	0.546448	1.63934	0	0	0.546448	0	0	0.546448	0	0	1.63934	0	1.63934	1.0929	1.0929	7.10383	3.27869	2.73224	2.18579	7.10383	3.82514	0	0.546448	0	19.1257	0	0	0	0	0	0	0	0.546448				211.362	1.63934
214.882	0.147493	3.24484	1.03245	1.9174	1.03245	0.737463	0.884956	0.294985	1.47493	0.737463	2.21239	0.147493	1.62242	3.9823	3.53982	0.294985	0.884956	1.47493	1.32743	0.147493	1.62242	0	1.62242	1.47493	0.294985	3.39233	0.294985	0.294985	1.76991	3.24484	0.442478	0	0.294985	0	16.3717	2.21239	2.21239	0	0.589971	0	0.737463	0	1.76991				214.882	0.294985
218.403	0.22779	0.683371	0.911162	1.36674	2.05011	0.911162	0.683371	1.36674	1.36674	6.37813	1.59453	0.22779	2.2779	5.01139	3.87244	0.22779	0.22779	0.22779	2.2779	0.22779	1.36674	0	1.36674	0.22779	0	2.96128	0.911162	0	2.96128	3.64465	2.05011	0	0.455581	0.22779	11.6173	0.911162	0.22779	0	2.2779	0	0.683371	0	2.2779				218.403	1.36674
221.901	0.220264	0.881057	0.660793	2.20264	0	0	1.54185	4.18502	0.881057	2.20264	0.660793	0	1.76211	4.84581	3.0837	0.660793	0.881057	1.32159	1.10132	0	1.10132	0.220264	0.881057	0.220264	0	3.74449	2.86344	1.10132	2.64317	4.18502	2.42291	0	1.54185	0.660793	8.81057	0	1.10132	0	0.660793	0	0	0	1.54185				221.901	4.18502
228.849	0.697674	0.465116	0.465116	2.09302	0	0.465116	2.32558	1.16279	3.25581	13.2558	0.465116	0.930233	3.02326	3.48837	2.55814	0.232558	0.465116	0.232558	0	0	1.86047	0.465116	1.39535	0.930233	0.697674	3.72093	0	0	1.16279	3.25581	1.39535	0.465116	0.697674	0.232558	10.4651	0.465116	0.465116	0.465116	0	0.232558	0.697674	0	1.16279				228.849	1.16279
232.369	2.18978	1.21655	0.973236	1.94647	0	0.486618	1.21655	1.94647	1.70316	0.243309	0.729927	0.486618	3.64964	3.16302	3.16302	0.243309	1.21655	0	0.973236	0	5.59611	2.18978	3.40633	0.486618	0	3.40633	0.729927	2.91971	0.486618	5.3528	0	0.973236	0.486618	0	10.4623	0.729927	0.243309	0	0	0	0.729927	0	0.973236				232.369	1.94647
235.914	0.789889	2.05371	1.26382	0.947867	0.315956	1.26382	1.4218	1.57978	1.4218	0.473934	1.26382	0	1.57978	3.47551	4.42338	0.315956	1.57978	0.315956	1.10585	0	3.31754	0.315956	3.00158	1.4218	0.473934	3.47551	0.315956	0.947867	4.42338	4.2654	0.631912	0.631912	0.157978	0	15.3239	0	0.631912	0	0	0	0.789889	0	1.89573				235.914	1.57978
238.332	1.05541	2.63852	3.69393	0.263852	0	0.527704	0.263852	3.69393	0	0.263852	0.263852	0.527704	0.527704	3.95778	1.58311	0.527704	0.791557	0.263852	0.791557	0	3.69393	0	3.69393	1.05541	0	3.69393	0.263852	0.263852	2.63852	6.33245	0	0.791557	0.527704	2.11082	20.3166	0	0.791557	0	0	0	0.791557	0	2.37467				238.332	3.69393
239.994	3.18725	1.99203	0.796813	2.39044	0	0	2.39044	1.19522	3.18725	4.38247	0.796813	0	4.38247	5.57769	3.18725	0.796813	0.398406	0.796813	1.19522	0	0.796813	0	0.796813	0.796813	0	0	0	0	3.18725	0.796813	0	1.19522	0.796813	1.59363	10.3586	0	0	0	0	0	0	0	1.19522				239.994	1.19522
251.825	4.2394	0	1.24688	0.249377	0	0.498753	1.74564	0.249377	2.49377	9.47631	1.49626	0.997506	0.997506	8.72818	8.22943	0.498753	0	3.2419	0	0	2.24439	1.24688	0.997506	0	1.49626	2.24439	0.74813	0.997506	1.49626	2.49377	1.99501	0	0.74813	0	7.73067	0	1.24688	0	1.24688	0	0	0	0.249377				251.825	0.249377
254.333	0	2.65781	3.32226	0.996678	0	0	0	2.32558	0.332226	1.99336	0.664452	2.32558	1.99336	6.97674	2.32558	0.996678	0.332226	0.996678	0.664452	0	3.32226	2.65781	0.664452	0	0.996678	3.98671	0.664452	0.996678	0.996678	2.32558	1.66113	0	0	0.332226	7.6412	0.332226	0.664452	0	0.332226	0	0.332226	0.332226	0				254.333	2.32558
258.312	0.578035	4.33526	2.31214	2.02312	0	0	0.867052	2.89017	0.289017	2.89017	0.289017	0.578035	2.31214	9.82659	7.22543	0	0.289017	1.44509	1.7341	0	1.15607	0.289017	0.867052	0	1.44509	1.7341	0.578035	0.867052	0.867052	4.33526	0.867052	0	0	0	4.62428	0	0.289017	0	0	0	0.289017	0	0.867052				258.312	2.89017
260.821	1.26263	1.0101	1.76768	1.26263	0.252525	0.757576	0.505051	2.52525	0	1.26263	1.76768	0.505051	6.31313	13.1313	2.27273	0	0	1.51515	1.26263	0	0.505051	0	0.505051	0	0.757576	4.0404	0.252525	0.252525	2.0202	2.27273	1.51515	0.505051	0.757576	0.757576	2.27273	0.252525	0	0	0.252525	0	0.505051	0	1.76768				260.821	2.52525
263.329	0.531915	1.32979	0.265957	1.06383	0	0	1.06383	1.8617	1.06383	17.2872	0	0	4.78723	7.18085	1.59574	0.265957	0.265957	0.265957	0.531915	0	1.32979	0.265957	1.06383	0.265957	0.265957	2.39362	1.06383	0.531915	1.32979	5.05319	0	0	0.531915	0	2.92553	0.531915	0.265957	0	0	0	0.797872	0	2.92553				263.329	1.8617
265.837	1.46699	4.15648	2.20049	0.977995	0	0	1.22249	2.44499	0.977995	2.93399	0.244499	0.244499	11.0024	13.4474	3.42298	0.244499	0	1.46699	0.488998	0.244499	0.244499	0	0.244499	0.244499	0	1.46699	0.733496	0.733496	0.488998	0.977995	0.733496	0.244499	0.244499	0	2.20049	0.244499	1.71149	0	0.488998	0	0	0	0.244499				265.837	2.44499
270.853	0.238095	4.28571	0.952381	0.238095	0	0.47619	1.42857	4.7619	1.19048	13.3333	0.47619	0.238095	1.66667	4.04762	4.04762	0.714286	0	1.42857	0.952381	0	0.47619	0.238095	0.238095	0.714286	0.714286	2.61905	0.47619	1.42857	0.714286	3.09524	1.19048	0	0	0.714286	4.04762	0.952381	1.42857	0	0.952381	0	0.238095	0	0.714286				270.853	4.7619
275.809	1.34048	4.02145	1.07239	4.02145	0	0.80429	1.60858	1.60858	0	1.60858	0.80429	0	1.34048	2.68097	0.80429	1.60858	0.268097	1.34048	0.268097	0	0.536193	0.536193	0	0.536193	0	8.31099	0.80429	2.94906	2.14477	4.82574	0	0	0	0	9.38338	0.80429	0.268097	0	0	0.268097	0	0	1.34048				275.809	1.60858
288.242	0	1.18483	0.7109	1.4218	0	0.947867	0.473934	0.7109	0.7109	0.947867	0.947867	1.18483	0	1.89573	3.31754	1.4218	0.7109	0.947867	2.60664	0	2.60664	0	2.60664	0.236967	0.947867	3.31754	0.947867	3.08057	3.79147	3.79147	2.36967	0	0.947867	0	14.6919	0.473934	0.236967	0	0.236967	0	0.236967	0	1.4218				288.242	0.7109
290.369	0.663717	4.20354	1.32743	1.76991	0.221239	0	0.663717	1.10619	0.884956	0.663717	0	0	1.54867	3.76106	5.53097	0.442478	1.32743	0.663717	0.884956	0.442478	1.10619	0.221239	0.884956	0.884956	0.442478	3.53982	0.884956	1.76991	2.21239	3.31858	2.43363	1.76991	0	0	10.177	0.442478	1.54867	0	0.221239	0	0	0	1.54867				290.369	1.10619
294.514	0.461894	1.38568	0.461894	1.38568	0	0	0.692841	2.30947	0.692841	6.92841	0.692841	0	0.692841	2.30947	2.30947	0.461894	0.230947	0	1.38568	0	2.77136	0.461894	2.30947	0.923788	0	5.31178	1.15473	0.692841	5.08083	3.9261	0	0.461894	0.461894	0	12.2402	0.461894	0.692841	0	0	0.461894	0.461894	0	1.84758				294.514	2.30947
300.703	0.25641	0.25641	2.05128	0.769231	0.25641	0	1.28205	3.33333	0.769231	10.5128	0.512821	0	0	1.53846	2.5641	0.512821	1.02564	0	0.512821	0	1.79487	0	1.79487	1.28205	0.25641	3.07692	0.769231	2.30769	2.5641	3.58974	1.28205	0.512821	0	0	12.3077	0.512821	1.28205	0	0.25641	0.25641	0.512821	0	1.28205				300.703	3.33333
302.885	0	2.72109	0.680272	1.13379	0	0.226757	0.453515	6.80272	0	0.907029	0	1.81406	0.680272	4.30839	1.36054	1.36054	0.226757	0	0.680272	0	4.30839	1.13379	3.1746	1.5873	0.226757	3.1746	1.36054	3.1746	4.53515	2.72109	0.680272	0	0.907029	0.453515	10.8844	0.453515	0.226757	0	1.13379	0.453515	0.226757	0	1.5873				302.885	6.80272
304.875	0.497512	4.22886	1.99005	1.24378	0	0.497512	0.248756	6.46766	0.248756	2.23881	0.746269	0.248756	0.995025	3.73134	1.24378	0.746269	0.995025	0.995025	0.995025	0	1.99005	1.24378	0.746269	1.24378	0.995025	3.73134	0.995025	3.73134	1.49254	1.49254	1.24378	0	0.248756	0	12.4378	0.248756	0.248756	0	0.746269	0.248756	0	0	1.24378				304.875	6.46766
309.019	0	2.53807	0.507614	1.26904	0	0	1.26904	2.28426	0.253807	11.9289	0.507614	0	0.761421	3.5533	5.07614	2.03046	0	0	1.01523	0	2.03046	0.253807	1.77665	1.01523	0.507614	5.58376	0.507614	3.29949	3.80711	3.04569	0	0.507614	0	0	11.4213	0.507614	0	0	0.761421	0.253807	0.761421	0.761421	0.507614				309.019	2.28426
317.308	0.519481	2.85714	0.779221	1.03896	0.25974	1.03896	1.2987	4.41558	1.03896	6.23377	1.81818	0	0.25974	3.8961	2.07792	0.25974	0.519481	0	0.779221	0	2.07792	0	2.07792	0.519481	0.779221	3.63636	1.55844	2.33766	3.8961	2.5974	1.81818	1.03896	0.519481	0.519481	15.3247	0.519481	0	0	1.2987	0	0	0	1.55844				317.308	4.41558
319.325	0.810811	1.62162	1.62162	2.16216	0	0.27027	1.08108	0	1.89189	20.5405	1.08108	0	0	1.08108	2.43243	0.27027	0.27027	0	1.89189	0	1.35135	0.27027	1.08108	1.35135	1.08108	4.86486	0	1.62162	3.24324	3.51351	1.89189	0.27027	1.08108	0	19.4595	0.27027	0.27027	0	0.540541	0.27027	0.27027	0	0.810811				319.325	0
323.497	1.22549	0.735294	0	2.69608	0.245098	0.735294	0.490196	2.45098	1.47059	1.47059	1.22549	0.735294	0.735294	3.18627	3.18627	0.490196	0.980392	0	0.735294	0	1.71569	0	1.71569	1.96078	0	2.45098	0	1.96078	2.94118	1.71569	0.245098	0.735294	0.490196	0	22.7941	0	0.245098	0	1.47059	0.245098	0	0	2.20588				323.497	2.45098
324.671	0	1.61943	0	1.21457	0	0	0.809717	0	0	0	4.04858	0	1.21457	3.64372	1.61943	0.404858	0	0	1.21457	0	3.23887	0	3.23887	1.21457	0	1.61943	2.83401	0	7.69231	4.45344	0	0	2.42915	5.66802	17.8138	0	2.42915	0	2.02429	0	0.809717	0	1.61943				324.671	0
332.007	1.05541	2.90237	0.527704	1.84697	0.527704	0.263852	0.527704	0.263852	1.31926	1.84697	2.11082	0.791557	0	8.70712	5.5409	0.527704	1.05541	0.263852	2.37467	0	5.5409	2.37467	3.16623	1.31926	0	4.22164	1.31926	1.58311	1.58311	5.01319	1.05541	0	0.791557	0	16.8865	0	4.48549	0	0.791557	0	0.263852	0.527704	0.791557				332.007	0.263852
334.231	1.59363	4.38247	1.19522	12.3506	0	1.19522	0.796813	0.796813	0.796813	2.78884	0.796813	0	5.17928	6.77291	7.96813	0	0	0	1.19522	0	0.398406	0	0.398406	0.796813	0	0.398406	0	2.39044	1.99203	1.19522	0	0	0	0.796813	6.77291	0	0	0	0	0	0.398406	0	0				334.231	0.796813
336.151	0.606061	1.51515	0.30303	6.9697	0.30303	1.51515	2.42424	6.06061	1.51515	21.5152	0.909091	0	2.42424	3.63636	7.87879	0	0	0	1.51515	0	2.42424	1.51515	0.909091	0.30303	0	2.12121	0	1.21212	0.606061	2.72727	0	0	0	0	3.0303	0	0	0	0.909091	0	0.909091	0.606061	0.30303				336.151	6.06061
340.295	0.797872	3.7234	0	3.19149	0	0	0.265957	0	1.8617	31.6489	0.265957	0	0.797872	5.05319	7.97872	0	0.531915	0	0.265957	0	1.32979	1.32979	0	0.797872	0	1.59574	0.531915	1.06383	0.531915	2.12766	0.265957	0	0.265957	0.531915	2.39362	0.531915	0.265957	0	0.531915	0	0	0	0.797872				340.295	0
341.442	1.98413	3.1746	0	3.96825	0	0	0.793651	0.396825	0	17.0635	0	0	5.15873	7.14286	8.33333	0	0	0	0	0	6.34921	5.15873	1.19048	0.396825	0	3.57143	0	0	2.38095	1.98413	0	0	0	0.396825	4.7619	0.396825	0	0	0	0.396825	0	0	1.5873				341.442	0.396825
344.44	0.611621	1.52905	0.30581	1.22324	0.30581	0.917431	1.22324	1.83486	0.611621	1.52905	0.917431	0.611621	0.917431	14.0673	14.0673	0.917431	0.30581	0	0.917431	0	6.72783	5.50459	1.22324	0.917431	0.30581	0.917431	0.30581	1.22324	0.917431	4.58716	0.611621	0	0.30581	0	8.25688	0	0	0	0.611621	0	0	0	0.30581				344.44	1.83486
348.584	0.712589	1.90024	0.23753	0.712589	0	0.950119	2.13777	3.80048	0	15.677	0.950119	1.66271	0.475059	2.85036	7.12589	0	0.475059	0.475059	1.18765	0	4.75059	2.85036	1.90024	1.42518	1.18765	4.27553	1.66271	2.13777	1.42518	7.12589	0.23753	0	0	0.23753	8.55107	0	0.23753	0	0	0	0	0	1.42518				348.584	3.80048
356.735	0.78534	2.09424	0	6.02094	0	0.26178	1.57068	7.06806	0.52356	28.2723	0.52356	0.26178	0.26178	2.09424	5.2356	0.52356	0	0.78534	0.52356	0	3.66492	2.09424	1.57068	1.83246	0.26178	3.9267	0	2.6178	0.52356	4.18848	0	0	0	0.78534	2.87958	0	0	0	0	0	0	0	1.3089				356.735	7.06806
358.917	0.630252	3.15126	0.630252	2.31092	0.210084	1.05042	1.47059	3.9916	0.630252	8.61345	0.420168	1.2605	0.210084	3.36134	11.3445	0.840336	0.840336	0.210084	0.630252	0	3.36134	1.47059	1.89076	0.210084	0	5.04202	1.05042	3.15126	0.630252	4.83193	0.630252	0	0.630252	0.420168	7.98319	0	0	0	0	0.630252	0.420168	0	0.630252				358.917	3.9916
363.062	0	1.44928	0.483092	3.86473	0.241546	0.241546	1.20773	0.724638	0.966184	0.966184	0.724638	0.966184	0.483092	4.10628	5.55556	1.20773	0.724638	0	1.20773	0.483092	8.45411	5.55556	2.89855	0.724638	0.724638	3.38164	1.20773	0.483092	5.31401	4.58937	3.1401	0	0.241546	0	12.0773	0.724638	0	0	0	0.724638	0	0	1.44928				363.062	0.724638
367.151	0.28169	0.84507	0	3.09859	0.28169	0.56338	0.56338	3.09859	0.56338	0.56338	0.56338	1.12676	1.69014	5.35211	3.94366	1.69014	0.28169	0.28169	1.40845	0	0.56338	0	0.56338	2.25352	0	4.78873	2.8169	2.8169	5.6338	8.16901	3.09859	0	0.56338	0	14.9296	0	0.56338	0	0	0	0	0	1.40845				367.151	3.09859
368.947	0	2.07792	0	3.11688	0	0.519481	0	6.23377	0.25974	0.779221	0.519481	1.2987	0	4.15584	1.81818	1.03896	2.33766	0.519481	0.779221	0	2.33766	0.519481	1.81818	0	0.519481	5.97403	0.779221	4.67532	2.85714	7.53247	2.07792	0.25974	0	0	16.6234	1.2987	1.55844	0	0.519481	0	0	0	3.11688				368.947	6.23377
373.091	0	1.9656	0.2457	1.9656	0	0.737101	0.2457	5.15971	0.737101	6.38821	1.2285	0.982801	0.4914	5.89681	3.4398	1.4742	0.4914	0.4914	0.4914	0	0.982801	0	0.982801	0.4914	0.2457	5.89681	1.7199	1.7199	4.4226	7.12531	0.4914	0	0.2457	0	16.2162	0.4914	0.982801	0	0	0.2457	0	0	3.1941				373.091	5.15971
377.236	0.391389	0.978474	0.391389	2.15264	0.391389	0.587084	0.391389	1.76125	1.95695	0.978474	0.978474	0.587084	0	5.67515	4.10959	0	1.36986	0	0.782779	0	1.95695	0.391389	1.56556	0.587084	0.587084	5.87084	0.978474	0.978474	1.17417	5.87084	0.782779	0	0.391389	0	16.8297	0.195695	1.36986	0	0.587084	0	0	0.587084	1.56556				377.236	1.76125
382.43	0	1.89189	0	1.62162	0	0.540541	1.08108	2.7027	0.810811	2.97297	0.540541	0	0.810811	2.97297	0	0	0.810811	0	0.540541	0	2.97297	0	2.97297	0.27027	0.810811	4.59459	2.16216	0.540541	0.810811	6.21622	1.35135	0	0	0	19.1892	1.62162	0.27027	0	0	0.27027	0	0.27027	3.24324				382.43	2.7027
386.574	0	0.253165	0.253165	1.01266	0	0.506329	0.253165	3.03797	0.253165	4.81013	0.759494	0	0	1.01266	1.51899	0.506329	0.759494	0	1.26582	0	2.78481	0	2.78481	0	0	1.51899	2.78481	1.51899	3.5443	4.05063	2.53165	0	0	0	22.0253	0.759494	0	0	0	0.253165	0	0	5.06329				386.574	3.03797
[truncated: 1 more columns]

## Sheet: Diatoms
	Depth	Age (ka)	Abundances	Fresh water species	Chaetoceros spp
	6.4	10.6872	3	2	4				Absent	0
	16.16	28.0952	4	4	4				R	1					1.07143
	25.82	45.6626	5	0	4				F	2
	35.32	63.2666	3	0	2				C	3					2.71429
	44.82	81.1955	4	3	4				A	4
	61.43	113.323	3	2	1				D	5
	71.02	132.325	3	4	0
	80.67	151.78	3	3	0
	90.2	171.322	4	0	4
	99.72	191.17	3	0	2
	109.19	211.237	3	3	1
	116.47	226.883	0	0	0
	128.1	252.274	4	0	0
	137.65	273.488	3	0	4
	147.16	294.939	2	0	2
	153.46	309.329	4	1	2
	165.98	338.35	2	3	0
	175.79	361.484	3	0	0
	178.09	366.958	1	0	0
	188.28	391.439	0	0	0

## Sheet: SST
Age (ka)	Polysolenia lappacea/ spinosa	Siphonosphaera abyssi	Dictyocoryne elegans	Dictyocoryne muelleri	Dictyocoryne profunda/ truncatum	Didymocyrtis tetrathalamus	Heliodiscus asteriscus/echiniscus	Larcopyle buetschlii	Phorticium pylonium/polycladum	Rhizoplegma boreale	Rhizosphaera medianum	Spongaster tetras tetras	Spongodiscus resurgens	Stylochlamydium venustum	Tetrapyle octacantha group	Acanthodesmia vinculata	Antarctissa ? sp, 1	Botryopyle scatum	Ceratospyris borealis	Eucecryphalus gegenbauri	Lithomelissa setosa	Lophophaena hispida	Plectacantha oikiskos	Pterocanium praetextum		Sum
0.789403	0	0	1.14123	0	0.142653	1.14123	0	3.42368	2.1398	0	0.142653	0	3.13837	0	17.4037	0.998573	0	0.713267	0	0	2.71041	3.70899	1.71184	0.285307		38.8017
1.51741	0.735294	0	0	1.10294	0	1.10294	0	2.57353	5.14706	0	0	0	0.367647	0	20.5882	0	0	0	0	0	0	0.735294	0.367647	0		32.7206
3.42074	0	0	0	1.13208	0.566038	0.754717	0	3.20755	1.88679	0	0	0	3.01887	0	14.5283	0.566038	0	0.566038	0	0	2.45283	2.83019	1.69811	0.566038		33.7736
6.05209	0.138313	0	0.829876	0.829876	0	1.93638	0	4.01107	1.52144	0	0	0	3.73444	0	10.6501	0.691563	0	0.968188	0	0	1.1065	3.18119	2.90456	1.38313		33.8866
6.78009	0	0	0	0	0.35461	0.35461	0	0	3.19149	0	0	0	4.96454	0	9.92908	0.70922	0	1.41844	0	0	0.70922	2.12766	0.35461	1.41844		25.5319
7.48178	0	0	0	1.21581	0	1.21581	0	0.911854	3.03951	0	0	0	2.43161	0	11.8541	1.21581	0	0.303951	0	0	0.911854	1.51976	2.12766	0.911854		27.6596
8.73606	0.17301	0	0.346021	0.17301	0.17301	0.865052	0	2.24913	0.692042	0	0	0	1.21107	0	4.67128	0.17301	0	0.17301	0	0	3.63322	0.865052	3.2872	0.17301		18.8581
10.1658	0.381679	0	0	0	0	0.763359	0	2.29008	4.96183	0	0	0	1.52672	0	6.48855	0.381679	0	0.381679	0	0	2.29008	0.381679	5.34351	0.381679		25.5725
11.3674	0.165289	0	0	1.65289	0	0	0	3.30579	1.4876	0	0.165289	0	4.6281	0	6.61157	0.661157	0	0	0	0	1.98347	0.495868	2.97521	0.330579		24.4628
13.9987	0	0	0	0.43573	0	0	0	2.61438	0.87146	0	0	0	1.52505	0	2.61438	0.217865	0	0	0	0	29.4118	0.217865	0.653595	0.43573		38.9978
14.7267	0.8	0	0	1.2	0	0	0	2.8	5.6	0	0	0	1.2	0	2.4	0	0	0	0	0	37.2	0.8	2.8	0.4		55.2
17.823	0	0	0	0.21097	0	0.21097	0	1.47679	0	0	0	0	1.05485	0	3.37553	0.421941	0	0	0	0	44.3038	0.421941	0.632911	0		52.1097
20.4543	0.191205	0	0.573614	0.191205	0.956023	0.191205	0	1.72084	0.764818	0	0.191205	0	2.67686	0	3.44168	0.191205	0	0	0	0	39.1969	0.764818	0.956023	0.764818		52.7725
23.0856	0	0	0	1.24555	0	0.533808	0	3.20285	0.88968	0	0	0	3.20285	0	5.87189	0	0	0.177936	0	0	15.3025	0.533808	1.77936	0.88968		33.6299
25.717	0.27027	0	0	0.27027	0	1.08108	0	1.08108	1.35135	0	0.540541	0	1.35135	0	4.32432	0	0	0	0	0	28.6486	0	0	0		38.9189
28.7167	0.419287	0	0.209644	1.67715	0	0.209644	0	4.61216	0.628931	0	0.209644	0	2.93501	0	3.14465	0.419287	0	0	0	0	23.4801	1.04822	0	0.838574		39.8323
31.3481	0.623053	0	0	1.86916	1.24611	1.24611	0	5.60748	2.49221	0	0.623053	0	2.18069	0	9.34579	0.623053	0	0.623053	0	0	11.215	0	0	0.311526		38.0062
32.1375	0.501672	0	0	0.668896	0	0.334448	0	4.01338	4.68227	0	0	0	2.17391	0	7.85953	0	0	0.167224	0	0	28.5953	0.334448	0	0		49.3311
34.7688	0	0	0	0.207469	0	0.622407	0	5.18672	2.48963	0	0.207469	0	0.829876	0	4.35685	0	0	0.207469	0	0	5.80913	0.207469	0	1.24481		21.3693
37.2894	0.229358	0	0	0.688073	0	0.229358	0	2.06422	1.6055	0	0	0	2.29358	0	4.3578	0	0	0	0	0	30.7339	0.688073	0	0.688073		43.578
39.7511	0	0	0	0.798403	0	0.399202	0	1.99601	1.79641	0	0.399202	0	0.199601	0	2.99401	0.199601	0	0.199601	0	0	32.7345	1.79641	0	0.199601		43.7126
42.2129	0.207039	0	0	0.414079	0	0.207039	0	2.69151	0.828157	0	0.414079	0	1.24224	0	4.34783	0	0	0	0	0	43.6853	0.414079	0	0.828157		55.2795
44.6911	0.682594	0	0	0	0	0.853242	0	1.87713	1.53584	0	0	0	2.04778	0	6.31399	0	0	0	0	0	29.8635	0	0	0.682594		43.8567
47.1529	0	0	0	1.15741	0.231481	1.85185	0	0.925926	2.5463	0	0.231481	0	2.08333	0	6.71296	0.925926	0	0	0	0	19.213	0.925926	0	0		36.8056
49.6147	0	0	0	0	0.219298	0	0	2.19298	2.85088	0	1.53509	0	1.09649	0	6.79825	0	0	0.219298	0	0	31.5789	1.09649	0	0.657895		48.2456
52.0765	0.175747	0	0	0.878735	0.702988	0.702988	0	1.93322	0.527241	0	0.878735	0	2.10896	0	4.21793	0.351494	0	0.351494	0	0	20.5624	1.05448	0	0.878735		35.3251
54.5383	0.20284	0	0	1.21704	0	0.811359	0	0.40568	1.21704	0	0.608519	0	0	0	9.73631	0.608519	0	0.20284	0	0	16.8357	1.21704	0	0		33.0629
57.0821	0	0	0	0.606061	0.20202	0.808081	0	4.24242	1.61616	0	0.20202	0	2.0202	0	5.85859	0.40404	0	0	0	0	3.0303	0.40404	0	0.40404		19.798
58.1489	0	0	0.867679	0.21692	0	0.21692	0	1.51844	0.867679	0	0	0	1.51844	0	7.80911	0	0	0.433839	0	0	3.47072	1.73536	0	0		18.6551
60.6106	0	0	0.201613	0.806452	0.201613	0.403226	0	1.6129	2.41935	0	1.6129	0	1.6129	0	3.02419	0	0	0.403226	0	0	39.3145	0.403226	0	0		52.0161
63.5812	0.40568	0	0.20284	0.608519	0	1.41988	0	4.0568	3.0426	0	0.811359	0	3.44828	0	10.7505	0	0	0.20284	0	0	11.359	1.41988	1.41988	1.41988		40.568
66.043	0	0	0	1.49573	0.213675	0.641026	0	1.92308	3.63248	0	0	0	3.4188	0	8.76068	0	0	0	0	0	23.9316	1.28205	1.7094	0.641026		47.6496
68.5048	0	0	0	0.379507	0	1.32827	0	1.89753	2.65655	0	0.948767	0	3.03605	0	8.34915	0.759013	0	0.379507	0	0	29.4118	0.948767	0.948767	0.189753		51.2334
71.3445	0.314961	0	0	0.314961	0.15748	1.25984	0	3.77953	0.472441	0	0.629921	0	1.25984	0	9.6063	0	0	0.314961	0	0	18.7402	1.10236	4.56693	0.787402		43.3071
75.5526	0.209644	0	0	0.628931	0.419287	1.67715	0	3.56394	0.628931	0	1.04822	0	3.14465	0	11.74	0	0	0.209644	0	0	8.80503	1.67715	6.91824	0.838574		41.5094
78.5161	0	0	0	0.983607	0.327869	0.983607	0	2.78689	1.47541	0	0.327869	0	3.27869	0	12.1311	0.327869	0	0	0	0	6.06557	2.95082	1.14754	0.327869		33.1148
80.6103	0.610687	0	0.305344	1.22137	0.610687	0.916031	0	2.44275	1.37405	0	0.763359	0	3.81679	0	10.5344	0.610687	0	0.152672	0	0	7.48092	1.83206	4.73282	0.305344		37.7099
82.0921	0	0	0.673401	1.3468	0.505051	1.17845	0	4.0404	0.841751	0	3.53535	0	3.87205	0	9.42761	0.673401	0	0.16835	0	0	19.1919	1.51515	3.7037	0.673401		51.3468
85.0555	0.185529	0	0.185529	1.2987	0.185529	1.66976	0	2.41187	4.26716	0	1.2987	0	3.71058	0	12.0594	0.371058	0	0	0	0	3.33952	1.2987	3.33952	0.927644		36.5492
94.1436	0.93633	0	0	0.187266	1.1236	1.31086	0	2.24719	1.49813	0	0.93633	0	2.99625	0	10.6742	0.374532	0	0.561798	0	0	8.98876	1.68539	0.561798	0.561798		34.6442
97.1071	0	0	0	0.980392	0	0.980392	0	4.41176	2.45098	0	0.980392	0	5.39216	0	13.7255	0.490196	0	0	0	0	7.84314	0.980392	1.96078	0.980392		41.1765
102.461	0.334448	0	0	1.00334	0.83612	1.00334	0	3.01003	1.67224	0	0.668896	0	4.34783	0	13.3779	#DIV/0!	0	#DIV/0!	0	0	8.19398	1.50502	4.34783	1.33779		#DIV/0!
105.425	0.575816	0	0	0.959693	0	0.767754	0	2.68714	1.72745	0	0	0	5.18234	0	12.2841	0.334448	0	0.501672	0	0	3.07102	1.34357	0.383877	0.575816		30.3947
108.419	0	0	0	1.38408	0	2.07612	0	1.7301	1.90311	0	1.7301	0	2.42215	0	8.65052	0.191939	0	0.767754	0	0	6.05536	0.865052	1.7301	0.519031		30.0254
111.969	0.283286	0	0	1.27479	0.283286	1.13314	0	2.54958	0.991501	0	0	0	1.983	0	9.34844	0	0	0.346021	0	0	20.255	0.849858	0.849858	0.566572		40.7143
115.519	0	0	0	2.00946	0.827423	2.24586	0	2.48227	3.5461	0	0	0	4.01891	0	18.4397	0	0	0.424929	0	0	3.30969	0.945626	1.30024	0		39.5502
119.14	0.242131	0	0.484262	2.05811	0.484262	0.605327	0	2.30024	2.17918	0	0	0	4.60048	0	20.9443	0.591017	0	0.472813	0	0	1.81598	2.30024	1.33172	1.08959		41.4997
120.122	0.4329	0	0	0.865801	0.4329	0.865801	0	3.0303	0	0	0	0	1.7316	0	19.0476	0.121065	0	1.33172	0	0	0.4329	1.2987	3.4632	2.5974		35.6519
122.689	0.225734	0	0.225734	1.58014	0.451467	0.902935	0	3.16027	1.3544	0	0	0	4.06321	0	15.8014	0.4329	0	0	0	0	3.83747	1.58014	0.225734	0.451467		34.2929
126.239	0	0	0	0	0	0.413223	0	1.65289	1.44628	0	0	0	1.23967	0	4.33884	0.451467	0	0.451467	0	0	7.2314	0.619835	1.44628	1.03306		20.3244
129.789	0	0	0.324675	0.649351	0.649351	0.324675	0	3.8961	0.649351	0	0	0	4.22078	0	8.11688	0.826446	0	0.206612	0	0	6.81818	2.92208	0	0.649351		30.2538
130.499	0	0	0	0.660066	0.330033	0	0	1.9802	1.9802	0	0	0	3.30033	0	3.63036	0.974026	0	0	0	0	5.94059	0.990099	1.65017	0		21.4361
134.049	0	0	0	0.315457	0.315457	0	0	1.57729	1.26183	0	0.315457	0	1.26183	0	1.57729	0	0	0	0	0	4.10095	0.630915	0	0		11.3565
137.599	0	0	0	0.591716	0	0.887574	0	3.25444	0.591716	0	0	0	1.77515	0	2.95858	0	0	0	0	0	13.6095	0.591716	0.591716	0		24.8521
141.148	0	0	0	0.879765	0	0.58651	0	1.17302	0.293255	0	0	0	2.34604	0	1.17302	0	0	0	0	0	36.0704	0.293255	2.05279	0		44.868
144.698	0	0	0	1.14943	0.287356	0	0	3.16092	2.01149	0	0	0	2.58621	0	4.88506	0	0	0	0	0	11.4943	0.862069	3.73563	0.862069		31.0345
147.964	0	0	0	0	0	0.223714	0	1.11857	0	0	0	0	1.11857	0	1.34228	0.574713	0	0	0	0	25.5034	1.11857	1.34228	0		32.3421
149.123	0	0	0	0	0	0	0	1.86047	0.232558	0	0.232558	0	2.32558	0	1.16279	0	0	0	0	0	17.907	0	0	0		23.7209
152.673	0	0	0	0	0.245098	0	0	1.22549	0.490196	0	0.245098	0	0.490196	0	1.47059	0.697674	0	0	0	0	5.14706	1.22549	0	0.245098		11.482
156.321	0	0	0	0	0	0	0	0.650759	0	0	0.21692	0	1.30152	0	1.73536	0.245098	0	0	0	0	44.4685	0.650759	0	0		49.269
159.168	0	0	0	0.458716	0	0.458716	0	1.14679	0	0	0.229358	0	1.14679	0	3.21101	0	0	0	0	0	5.27523	0.688073	0	0.458716		13.0734
162.015	0	0	0	0	0	0	0	0	0.7109	0	0	0	3.31754	0	2.60664	0	0	0	0	0	6.63507	1.18483	1.89573	0		16.3507
164.767	0	0	0	0.742574	0.49505	0	0	4.45545	0.990099	0	0.247525	0	5.44554	0	1.73267	0.473934	0	0	0	0	3.21782	0.247525	1.48515	0.742574		20.2759
167.67	0	0	0	0.985222	0	0	0	1.97044	0	0	0	0	3.44828	0	3.44828	0	0	0	0	0	3.44828	1.97044	1.72414	0.985222		17.9803
170.517	0	0	0	0.197239	0	0.197239	0	1.97239	0.788955	0	0.197239	0	3.5503	0	3.74753	0.246305	0	0	0	0	24.6548	0.197239	3.94477	0		39.694
172.813	0.208333	0	0.625	0.625	0	0.208333	0	2.70833	0	0	0	0	3.54167	0	5.83333	0	0	0	0	0	2.5	1.25	3.75	1.04167		22.2917
175.66	0.227273	0	0	0.454545	0	0.454545	0	5	0.681818	0	0	0	3.63636	0	6.36364	0.208333	0	0.208333	0	0	2.27273	1.13636	2.72727	0.454545		23.8258
178.526	0	0	0.514139	0.514139	0.771208	0	0	2.05656	1.79949	0	0	0	2.82776	0	5.39846	0.454545	0	0.227273	0	0	39.3316	0.771208	0.514139	0		55.1805
180.518	0	0	0	0	0.2331	0	0	3.0303	1.1655	0	0	0	2.0979	0	5.59441	0	0	0	0	0	3.9627	0.2331	0.932401	0.4662		17.7156
182.17	0	0	0	0.465116	0.465116	0.465116	0	5.34884	1.86047	0	0	0	6.51163	0	5.34884	0.2331	0	0	0	0	1.39535	0	1.62791	1.62791		25.3494
185.035	0	0	0	1.36054	0	0.453515	0	4.98866	0	0	0.226757	0	2.94785	0	5.89569	0.232558	0	0	0	0	2.04082	0.226757	0.453515	0.453515		19.2802
187.882	0	0	0	0.2457	0	0	0	2.457	0	0	0	0	5.40541	0	7.12531	0	0	0	0	0	1.2285	0	0.4914	0		16.9533
190.729	0	0	0.395257	1.77866	0.395257	0.395257	0	2.96443	1.58103	0	0.395257	0	3.35968	0	12.253	0.2457	0	0	0	0	0.197628	0.197628	0.592885	0.790514		25.5421
195.682	0	0	0.221239	0.442478	0	1.10619	0	3.31858	1.10619	0	0	0	2.65487	0	14.6018	0.197628	0	0.395257	0	0	8.62832	0.221239	1.54867	1.32743		35.7699
199.203	0	0	0.162866	0.651466	0.977199	0.977199	0	2.28013	1.30293	0	0	0	3.90879	0	19.2182	0.442478	0	0.221239	0	0	2.9316	2.76873	2.28013	0.325733		38.4487
202.724	0.190114	0	0	0.380228	0.190114	0.380228	0	3.42205	1.71103	0	0	0	3.61217	0	16.3498	0.162866	0	0.651466	0	0	4.75285	0.760456	1.71103	0.95057		35.225
206.245	0	0	0.176056	0.528169	1.05634	1.23239	0	6.51408	2.11268	0	0.176056	0	4.57746	0	19.7183	0	0	0.190114	0	0	6.8662	1.76056	0	0.704225		45.6126
211.362	0.546448	0	1.0929	0	0.546448	1.0929	0	7.10383	2.18579	0	0	0	7.10383	0	19.1257	0.352113	0	0.704225	0	0	0	0.546448	0	0		40.4006
214.882	0.147493	0	0.294985	0.737463	0.589971	1.47493	0	3.39233	1.76991	0	0	0	3.24484	0	16.3717	0	0	0.546448	0	0	0.737463	2.21239	1.62242	0.294985		33.4373
218.403	0.22779	0	0.455581	0.911162	0	0.22779	0	2.96128	2.96128	0	0	0	3.64465	0	11.6173	0.147493	0	1.03245	0	0	6.37813	1.59453	2.2779	0.22779		34.6651
221.901	0.220264	0	0	0.881057	0	0.220264	0	3.74449	2.64317	0	0.220264	0	4.18502	0	8.81057	0.455581	0	2.05011	0	0	2.20264	0.660793	1.76211	0.660793		28.7171
228.849	0.232558	0	0	1.39535	0	0.930233	0	3.72093	1.16279	0	0.465116	0	3.25581	0	10.4651	0.220264	0	0	0	0	13.2558	0.465116	3.02326	0.232558		38.8249
232.369	0.486618	0	0.973236	2.18978	0.243309	0.486618	0	3.40633	0.486618	0	2.18978	0	5.3528	0	10.4623	0.465116	0	0	0	0	0.243309	0.729927	3.64964	0.243309		31.6087
235.914	0	0	0.947867	1.4218	0.473934	1.4218	0	3.47551	4.42338	0	0.315956	0	4.2654	0	15.3239	0.243309	0	0	0	0	0.473934	1.26382	1.57978	0.315956		35.9463
238.332	0	0	0.527704	1.05541	1.84697	1.05541	0	3.69393	2.63852	0	0	0	6.33245	0	20.3166	0	0	0.315956	0	0	0.263852	0.263852	0.527704	0.527704		39.3661
239.994	0	0	0	0	0	0.796813	0	0	3.18725	0	0	0	0.796813	0	10.3586	0	0	0	0	0	4.38247	0.796813	4.38247	0.796813		25.498
251.825	0	0	0.249377	0.498753	0.249377	0	0	2.24439	1.49626	0	1.24688	0	2.49377	0	7.73067	0.796813	0	0	0	0	9.47631	1.49626	0.997506	0.498753		29.4751
254.333	0	0	0	0	0.664452	0	0	3.98671	0.996678	0	2.65781	0	2.32558	0	7.6412	#DIV/0!	0	#DIV/0!	0	0	1.99336	0.664452	1.99336	0.996678		#DIV/0!
258.312	0	0	0	0.578035	0	0	0	1.7341	0.867052	0	0.289017	0	4.33526	0	4.62428	0.249377	0	0	0	0	2.89017	0.289017	2.31214	0		18.1685
260.821	0	0	0	0.505051	0	0	0	4.0404	2.0202	0	0	0	2.27273	0	2.27273	0.332226	0	0	0	0	1.26263	1.76768	6.31313	0		20.7868
263.329	0	0	0	1.06383	0	0.265957	0	2.39362	1.32979	0	0.265957	0	5.05319	0	2.92553	0	0	0	0	0	17.2872	0	4.78723	0.265957		35.6383
265.837	0	0	0	0.244499	0	0.244499	0	1.46699	0.488998	0	0	0	0.977995	0	2.20049	0	0	0.252525	0	0	2.93399	0.244499	11.0024	0.244499		20.3014
270.853	0.238095	0	0.238095	0	0	0.714286	0	2.61905	0.714286	0	0.238095	0	3.09524	0	4.04762	0.265957	0	0	0	0	13.3333	0.47619	1.66667	0.714286		28.3612
275.809	0	0	0	0	0	0.536193	0	8.31099	2.14477	0	0.536193	0	4.82574	0	9.38338	0	0	0	0	0	1.60858	0.80429	1.34048	1.60858		31.0992
288.242	0	0	0.473934	1.18483	0.947867	0.236967	0	3.31754	3.79147	0	0	0	3.79147	0	14.6919	0.238095	0	0	0	0	0.947867	0.947867	0	1.4218		31.9916
290.369	0.221239	0	0	0.663717	0	0.884956	0	3.53982	2.21239	0	0.221239	0	3.31858	0	10.177	0.536193	0	0	0	0	0.663717	0	1.54867	0.442478		24.43
294.514	0	0	0.230947	1.84758	0.230947	0.923788	0	5.31178	5.08083	0	0.461894	0	3.9261	0	12.2402	0.7109	0	0	0	0	6.92841	0.692841	0.692841	0.461894		39.7409
300.703	0	0	0.512821	1.02564	0.25641	1.28205	0	3.07692	2.5641	0	0	0	3.58974	0	12.3077	0	0	0.221239	0	0	10.5128	0.512821	0	0.512821		36.3751
302.885	0.907029	0	0.226757	2.04082	0.226757	1.5873	0	3.1746	4.53515	0	1.13379	0	2.72109	0	10.8844	0.230947	0	0	0	0	0.907029	0	0.680272	1.36054		30.6164
304.875	0	0	0	0	0.497512	1.24378	0	3.73134	1.49254	0	1.24378	0	1.49254	0	12.4378	0.25641	0	0.25641	0	0	2.23881	0.746269	0.995025	0.746269		27.3785
309.019	0.253807	0	0.253807	1.01523	0.253807	1.01523	0	5.58376	3.80711	0	0.253807	0	3.04569	0	11.4213	0.453515	0	0	0	0	11.9289	0.507614	0.761421	2.03046		42.5855
317.308	0	0	0	1.55844	0.25974	0.519481	0	3.63636	3.8961	0	0	0	2.5974	0	15.3247	0.497512	0	0	0	0	6.23377	1.81818	0.25974	0.25974		36.8611
319.325	0.27027	0	0	0.540541	0.540541	1.35135	0	4.86486	3.24324	0	0.27027	0	3.51351	0	19.4595	0.507614	0	0	0	0	20.5405	1.08108	0	0.27027		56.4536
323.497	0.735294	0	0	1.47059	0	1.96078	0	2.45098	2.94118	0	0	0	1.71569	0	22.7941	0	0	0.25974	0	0	1.47059	1.22549	0.735294	0.490196		38.2499
324.671	0	0	0	1.61943	0.809717	1.21457	0	1.61943	7.69231	0	0	0	4.45344	0	17.8138	0	0	0	0	0	0	4.04858	1.21457	0.404858		40.8907
332.007	0	0	0.263852	2.37467	0.527704	1.31926	0	4.22164	1.58311	0	2.37467	0	5.01319	0	16.8865	0.245098	0	0.245098	0	0	1.84697	2.11082	0	0.527704		39.5403
334.231	0	0	0	0.398406	0	0.796813	0	0.398406	1.99203	0	0	0	1.19522	0	6.77291	0	0	0	0	0	2.78884	0.796813	5.17928	0		20.3187
336.151	0	0	0	0.606061	0	0.30303	0	2.12121	0.606061	0	1.51515	0	2.72727	0	3.0303	#DIV/0!	0	#DIV/0!	0	0	21.5152	0.909091	2.42424	0		#DIV/0!
340.295	0	0	0	0	0	0.797872	0	1.59574	0.531915	0	1.32979	0	2.12766	0	2.39362	0.791557	0	0.527704	0	0	31.6489	0.265957	0.797872	0		42.8086
341.442	0	0	0	0.793651	0	0.396825	0	3.57143	2.38095	0	5.15873	0	1.98413	0	4.7619	0	0	0	0	0	17.0635	0	5.15873	0		41.2698
344.44	0	0	0	0.611621	0.30581	0.917431	0	0.917431	0.917431	0	5.50459	0	4.58716	0	8.25688	0.606061	0	0.30303	0	0	1.52905	0.917431	0.917431	0.917431		27.2088
348.584	0	0	0	1.66271	0	1.42518	0	4.27553	1.42518	0	2.85036	0	7.12589	0	8.55107	0	0	0	0	0	15.677	0.950119	0.475059	0		44.4181
356.735	0.26178	0	0	1.04712	0	1.83246	0	3.9267	0.52356	0	2.09424	0	4.18848	0	2.87958	0	0	0	0	0	28.2723	0.52356	0.26178	0.52356		46.3351
358.917	0.420168	0	0	1.2605	0.420168	0.210084	0	5.04202	0.630252	0	1.47059	0	4.83193	0	7.98319	0	0	0.30581	0	0	8.61345	0.420168	0.210084	0.840336		32.6588
363.062	0.966184	0	0.724638	1.69082	0.241546	0.724638	0	3.38164	5.31401	0	5.55556	0	4.58937	0	12.0773	0.241546	0	0	0	0	0.966184	0.724638	0.483092	1.20773		38.8889
367.151	0	0	0	0	0.56338	2.25352	0	4.78873	5.6338	0	0	0	8.16901	0	14.9296	0	0	0	0	0	0.56338	0.56338	1.69014	1.69014		40.8451
368.947	0.519481	0	0	1.2987	0.519481	0	0	5.97403	2.85714	0	0.519481	0	7.53247	0	16.6234	0.25974	0	0.210084	0	0	0.779221	0.519481	0	1.03896		38.6516
373.091	0	0	0	0.737101	0	0.4914	0	5.89681	4.4226	0	0	0	7.12531	0	16.2162	0	0	0.241546	0	0	6.38821	1.2285	0.4914	1.4742		44.7133
377.236	0.195695	0	0	1.17417	0	0.587084	0	5.87084	1.17417	0	0.391389	0	5.87084	0	16.8297	0.391389	0	0.28169	0	0	0.978474	0.978474	0	0		34.724
382.43	0	0	0	2.16216	0.540541	0.27027	0	4.59459	0.810811	0	0	0	6.21622	0	19.1892	0.27027	0	0	0	0	2.97297	0.540541	0.810811	0		38.3784
386.574	0.506329	0	0	2.27848	0.506329	0	0	1.51899	3.5443	0	0	0	4.05063	0	22.0253	0.253165	0	0.391389	0	0	4.81013	0.759494	0	0.506329		41.1509

[truncated: 7 more sheets: SST Normal., Int TC, INT Normal., Log(>2%), Grouping, PPP, Feuil2]
